# Supplementary material for: Divergent evolution in the genomes of closely related lacertids, Lacerta viridis and L. bilineata, and implications for speciation
Source: PubMed Central journal article supplement (PMC6381762; doi:10.1093/gigascience/giy160), 2018-12-10

## Divergent evolution in the genomes of closely-related lacertids, *Lacerta viridis* and *L. bilineata* and implications for speciation

--Manuscript Draft--

|                                                      |                                                                                                                                                                                                                                                                                                                                                                                                                                                                                                                                                                                                                                                                                                                                                                                                                                                                                                                                                                                                                                                                                                                                                                                                                                                                                                                                                                                                                                                                                                                                                                                                                                                                                                                                                                                                                                                                                                                                                                                                                                                                                           |                     |
|------------------------------------------------------|-------------------------------------------------------------------------------------------------------------------------------------------------------------------------------------------------------------------------------------------------------------------------------------------------------------------------------------------------------------------------------------------------------------------------------------------------------------------------------------------------------------------------------------------------------------------------------------------------------------------------------------------------------------------------------------------------------------------------------------------------------------------------------------------------------------------------------------------------------------------------------------------------------------------------------------------------------------------------------------------------------------------------------------------------------------------------------------------------------------------------------------------------------------------------------------------------------------------------------------------------------------------------------------------------------------------------------------------------------------------------------------------------------------------------------------------------------------------------------------------------------------------------------------------------------------------------------------------------------------------------------------------------------------------------------------------------------------------------------------------------------------------------------------------------------------------------------------------------------------------------------------------------------------------------------------------------------------------------------------------------------------------------------------------------------------------------------------------|---------------------|
| <b>Manuscript Number:</b>                            | GIGA-D-18-00173                                                                                                                                                                                                                                                                                                                                                                                                                                                                                                                                                                                                                                                                                                                                                                                                                                                                                                                                                                                                                                                                                                                                                                                                                                                                                                                                                                                                                                                                                                                                                                                                                                                                                                                                                                                                                                                                                                                                                                                                                                                                           |                     |
| <b>Full Title:</b>                                   | Divergent evolution in the genomes of closely-related lacertids, <i>Lacerta viridis</i> and <i>L. bilineata</i> and implications for speciation                                                                                                                                                                                                                                                                                                                                                                                                                                                                                                                                                                                                                                                                                                                                                                                                                                                                                                                                                                                                                                                                                                                                                                                                                                                                                                                                                                                                                                                                                                                                                                                                                                                                                                                                                                                                                                                                                                                                           |                     |
| <b>Article Type:</b>                                 | Research                                                                                                                                                                                                                                                                                                                                                                                                                                                                                                                                                                                                                                                                                                                                                                                                                                                                                                                                                                                                                                                                                                                                                                                                                                                                                                                                                                                                                                                                                                                                                                                                                                                                                                                                                                                                                                                                                                                                                                                                                                                                                  |                     |
| <b>Funding Information:</b>                          | Deutsche Forschungsgemeinschaft (FZT118)                                                                                                                                                                                                                                                                                                                                                                                                                                                                                                                                                                                                                                                                                                                                                                                                                                                                                                                                                                                                                                                                                                                                                                                                                                                                                                                                                                                                                                                                                                                                                                                                                                                                                                                                                                                                                                                                                                                                                                                                                                                  | Dr. Martin Schlegel |
| <b>Abstract:</b>                                     | <p>Background: <i>Lacerta viridis</i> and <i>L. bilineata</i> are sister species of European green lizards (eastern and western clades respectively), which until recently were grouped together as the <i>L. viridis</i> complex. Genetic incompatibilities were observed between lacertid populations through crossing experiments, which led to the delineation of two separate species within the <i>L. viridis</i> complex. The population histories of these sister species and processes driving divergence are unknown. We constructed high quality de novo genome assemblies for both <i>L. viridis</i> and <i>L. bilineata</i> through Illumina and PacBio sequencing, with annotation support provided from transcriptome sequencing of several tissues. To estimate gene flow between the two species and identify the intrinsic and extrinsic factors involved in reproductive isolation, we studied their evolutionary histories, identified cross-species genomic rearrangements, detected evolutionary pressures on non-coding RNA and genes undergoing varying selection pressures.</p> <p>Findings: Here we show that the gene flow between the lacertid species was primarily unidirectional from <i>L. viridis</i> to <i>L. bilineata</i> since their split 2.7-3.05 Mya. Adaptive evolution of the non-coding repertoire, mutations in transcription factors, accumulation of divergence through inversions and selection on genes involved in neural development, reproduction and behavior have been critical for reduced reproductive success between lacertid species.</p> <p>Conclusion: Divergent evolution between lacertid species is a result of adaptive evolution of non-coding elements, cognitive and reproductive genes. We propose that assortative mating in lacertids is influenced by diversification of genes responsible for cutaneous response on exposure to UV-B. Our results provide valuable insights into the demographic history and factors contributing to evolutionary divergence leading to speciation in European green lizards.</p> |                     |
| <b>Corresponding Author:</b>                         | Rohit Kolra<br><br>GERMANY                                                                                                                                                                                                                                                                                                                                                                                                                                                                                                                                                                                                                                                                                                                                                                                                                                                                                                                                                                                                                                                                                                                                                                                                                                                                                                                                                                                                                                                                                                                                                                                                                                                                                                                                                                                                                                                                                                                                                                                                                                                                |                     |
| <b>Corresponding Author Secondary Information:</b>   |                                                                                                                                                                                                                                                                                                                                                                                                                                                                                                                                                                                                                                                                                                                                                                                                                                                                                                                                                                                                                                                                                                                                                                                                                                                                                                                                                                                                                                                                                                                                                                                                                                                                                                                                                                                                                                                                                                                                                                                                                                                                                           |                     |
| <b>Corresponding Author's Institution:</b>           |                                                                                                                                                                                                                                                                                                                                                                                                                                                                                                                                                                                                                                                                                                                                                                                                                                                                                                                                                                                                                                                                                                                                                                                                                                                                                                                                                                                                                                                                                                                                                                                                                                                                                                                                                                                                                                                                                                                                                                                                                                                                                           |                     |
| <b>Corresponding Author's Secondary Institution:</b> |                                                                                                                                                                                                                                                                                                                                                                                                                                                                                                                                                                                                                                                                                                                                                                                                                                                                                                                                                                                                                                                                                                                                                                                                                                                                                                                                                                                                                                                                                                                                                                                                                                                                                                                                                                                                                                                                                                                                                                                                                                                                                           |                     |
| <b>First Author:</b>                                 | Sree Rohit Rohit Kolra                                                                                                                                                                                                                                                                                                                                                                                                                                                                                                                                                                                                                                                                                                                                                                                                                                                                                                                                                                                                                                                                                                                                                                                                                                                                                                                                                                                                                                                                                                                                                                                                                                                                                                                                                                                                                                                                                                                                                                                                                                                                    |                     |
| <b>First Author Secondary Information:</b>           |                                                                                                                                                                                                                                                                                                                                                                                                                                                                                                                                                                                                                                                                                                                                                                                                                                                                                                                                                                                                                                                                                                                                                                                                                                                                                                                                                                                                                                                                                                                                                                                                                                                                                                                                                                                                                                                                                                                                                                                                                                                                                           |                     |
| <b>Order of Authors:</b>                             | Sree Rohit Rohit Kolra                                                                                                                                                                                                                                                                                                                                                                                                                                                                                                                                                                                                                                                                                                                                                                                                                                                                                                                                                                                                                                                                                                                                                                                                                                                                                                                                                                                                                                                                                                                                                                                                                                                                                                                                                                                                                                                                                                                                                                                                                                                                    |                     |
|                                                      | Anne Weigert                                                                                                                                                                                                                                                                                                                                                                                                                                                                                                                                                                                                                                                                                                                                                                                                                                                                                                                                                                                                                                                                                                                                                                                                                                                                                                                                                                                                                                                                                                                                                                                                                                                                                                                                                                                                                                                                                                                                                                                                                                                                              |                     |
|                                                      | Amin Saffari                                                                                                                                                                                                                                                                                                                                                                                                                                                                                                                                                                                                                                                                                                                                                                                                                                                                                                                                                                                                                                                                                                                                                                                                                                                                                                                                                                                                                                                                                                                                                                                                                                                                                                                                                                                                                                                                                                                                                                                                                                                                              |                     |
|                                                      | Stephanie Kehr                                                                                                                                                                                                                                                                                                                                                                                                                                                                                                                                                                                                                                                                                                                                                                                                                                                                                                                                                                                                                                                                                                                                                                                                                                                                                                                                                                                                                                                                                                                                                                                                                                                                                                                                                                                                                                                                                                                                                                                                                                                                            |                     |
|                                                      | Maria Beatriz Walter Costa                                                                                                                                                                                                                                                                                                                                                                                                                                                                                                                                                                                                                                                                                                                                                                                                                                                                                                                                                                                                                                                                                                                                                                                                                                                                                                                                                                                                                                                                                                                                                                                                                                                                                                                                                                                                                                                                                                                                                                                                                                                                |                     |
|                                                      | Cathrin Spröer                                                                                                                                                                                                                                                                                                                                                                                                                                                                                                                                                                                                                                                                                                                                                                                                                                                                                                                                                                                                                                                                                                                                                                                                                                                                                                                                                                                                                                                                                                                                                                                                                                                                                                                                                                                                                                                                                                                                                                                                                                                                            |                     |
|                                                      |                                                                                                                                                                                                                                                                                                                                                                                                                                                                                                                                                                                                                                                                                                                                                                                                                                                                                                                                                                                                                                                                                                                                                                                                                                                                                                                                                                                                                                                                                                                                                                                                                                                                                                                                                                                                                                                                                                                                                                                                                                                                                           |                     |

|                                                                                                                                                                                                                                                                                                                                                                                                                                                                                                                               |                       |
|-------------------------------------------------------------------------------------------------------------------------------------------------------------------------------------------------------------------------------------------------------------------------------------------------------------------------------------------------------------------------------------------------------------------------------------------------------------------------------------------------------------------------------|-----------------------|
|                                                                                                                                                                                                                                                                                                                                                                                                                                                                                                                               | Henrike Indrischek    |
|                                                                                                                                                                                                                                                                                                                                                                                                                                                                                                                               | Gero Doose            |
|                                                                                                                                                                                                                                                                                                                                                                                                                                                                                                                               | Manjusha Chintalapati |
|                                                                                                                                                                                                                                                                                                                                                                                                                                                                                                                               | Konrad Lohse          |
|                                                                                                                                                                                                                                                                                                                                                                                                                                                                                                                               | Jörg Overmann         |
|                                                                                                                                                                                                                                                                                                                                                                                                                                                                                                                               | Boyke Bunk            |
|                                                                                                                                                                                                                                                                                                                                                                                                                                                                                                                               | Christoph Bleidorn    |
|                                                                                                                                                                                                                                                                                                                                                                                                                                                                                                                               | Klaus Henle           |
|                                                                                                                                                                                                                                                                                                                                                                                                                                                                                                                               | Katja Nowick          |
|                                                                                                                                                                                                                                                                                                                                                                                                                                                                                                                               | Rui Faria             |
|                                                                                                                                                                                                                                                                                                                                                                                                                                                                                                                               | Peter F Stadler       |
|                                                                                                                                                                                                                                                                                                                                                                                                                                                                                                                               | Martin Schlegel       |
| <b>Order of Authors Secondary Information:</b>                                                                                                                                                                                                                                                                                                                                                                                                                                                                                |                       |
| <b>Additional Information:</b>                                                                                                                                                                                                                                                                                                                                                                                                                                                                                                |                       |
| <b>Question</b>                                                                                                                                                                                                                                                                                                                                                                                                                                                                                                               | <b>Response</b>       |
| Are you submitting this manuscript to a special series or article collection?                                                                                                                                                                                                                                                                                                                                                                                                                                                 | No                    |
| <b>Experimental design and statistics</b><br><br>Full details of the experimental design and statistical methods used should be given in the Methods section, as detailed in our <a href="#">Minimum Standards Reporting Checklist</a> . Information essential to interpreting the data presented should be made available in the figure legends.<br><br>Have you included all the information requested in your manuscript?                                                                                                  | Yes                   |
| <b>Resources</b><br><br>A description of all resources used, including antibodies, cell lines, animals and software tools, with enough information to allow them to be uniquely identified, should be included in the Methods section. Authors are strongly encouraged to cite <a href="#">Research Resource Identifiers</a> (RRIDs) for antibodies, model organisms and tools, where possible.<br><br>Have you included the information requested as detailed in our <a href="#">Minimum Standards Reporting Checklist</a> ? | Yes                   |
| <b>Availability of data and materials</b>                                                                                                                                                                                                                                                                                                                                                                                                                                                                                     | Yes                   |

All datasets and code on which the conclusions of the paper rely must be either included in your submission or deposited in [publicly available repositories](#) (where available and ethically appropriate), referencing such data using a unique identifier in the references and in the “Availability of Data and Materials” section of your manuscript.

Have you have met the above requirement as detailed in our [Minimum Standards Reporting Checklist](#)?

1 **Divergent evolution in the genomes of closely-related lacertids, *Lacerta***  
2 ***viridis* and *L. bilineata* and implications for speciation**

3 Rohit Kolora, Anne Weigert<sup>‡</sup>, Amin Saffari<sup>‡</sup>, Stephanie Kehr, Maria Beatriz Walter Costa,  
4 Cathrin Spröer, Henrike Indrischek, Gero Doose, Manjusha Chintalapati, Konrad Lohse, Jörg  
5 Overmann, Boyke Bunk, Christoph Bleidorn, Klaus Henle, Katja Nowick, Rui Faria, Peter F  
6 Stadler, Martin Schlegel

7 <sup>‡</sup> These authors contributed equally to this work.

8  
9 **Abstract**

10 **Background:** *Lacerta viridis* and *L. bilineata* are sister species of European green lizards  
11 (eastern and western clades respectively), which until recently were grouped together as the *L.*  
12 *viridis* complex. Genetic incompatibilities were observed between lacertid populations through  
13 crossing experiments, which led to the delineation of two separate species within the *L. viridis*  
14 complex. The population histories of these sister species and processes driving divergence are  
15 unknown. We constructed high quality *de novo* genome assemblies for both *L. viridis* and *L.*  
16 *bilineata* through Illumina and PacBio sequencing, with annotation support provided from  
17 transcriptome sequencing of several tissues. To estimate gene flow between the two species and  
18 identify the intrinsic and extrinsic factors involved in reproductive isolation, we studied their  
19 evolutionary histories, identified cross-species genomic rearrangements, detected evolutionary  
20 pressures on non-coding RNA and genes undergoing varying selection pressures.

21 **Findings:** Here we show that the gene flow between the lacertid species was primarily  
22 unidirectional from *L. viridis* to *L. bilineata* since their split 2.7-3.05 Mya. Adaptive evolution  
23 of the non-coding repertoire, mutations in transcription factors, accumulation of divergence

24 through inversions and selection on genes involved in neural development, reproduction and  
25 behavior have been critical for reduced reproductive success between lacertid species.

26 **Conclusion:** Divergent evolution between lacertid species is a result of adaptive evolution of  
27 non-coding elements, cognitive and reproductive genes. We propose that assortative mating in  
28 lacertids is influenced by diversification of genes responsible for cutaneous response on  
29 exposure to UV-B. Our results provide valuable insights into the demographic history and  
30 factors contributing to evolutionary divergence leading to speciation in European green lizards.

31

## 32 **Introduction**

33 Understanding what species are and the processes driving their emergence have been two  
34 central issues in biology [1]. Divergent evolution, which can eventually lead to speciation, is  
35 driven by various mechanisms, such as chromosomal rearrangements, polyploidy in plants,  
36 whole genome duplications followed by differential loss of genes and reduced hybrid viability  
37 or sterility through Bateson-Dobzhansky-Muller incompatibilities (BDMIs) [2]. Both genetic  
38 drift and selection can lead to the emergence of reproductive barriers, in particular intrinsic  
39 BDMIs and, ultimately speciation.

40 During the last century, the genes involved in reproductive isolation were essentially identified  
41 through crosses in the lab [3]. Studies characterizing these so-called “speciation genes” in  
42 model organisms such as *Drosophila*, revealed several general patterns: i) genes involved in  
43 post-zygotic incompatibilities show signatures of accelerated evolution [3]; ii) incompatibilities  
44 often involve a disproportionate number of genes located on sex chromosomes [4, 5] and iii)  
45 mis-expression is often observed in hybrids, suggesting that gene regulation is an important  
46 component of speciation [6-8]. Genes involved in speciation can often be non-essential and  
47 reproductive isolation can be restricted to a few loci in the genome [9, 10].

1  
2  
3  
4  
5  
6  
7  
8  
9  
10  
11  
12  
13  
14  
15  
16  
17  
18  
19  
20  
21  
22  
23  
24  
25  
26  
27  
28  
29  
30  
31  
32  
33  
48 The advent of high throughput sequencing has enabled comparative genomic analyses making  
49 it possible to identify genomic regions contributing to diversification. Additionally, their  
50 distribution across the genome provides crucial information to understand the genomic  
51 architecture of speciation [11]. For instance, genomic rearrangements can now be detected in  
52 model and non-model organisms using *in-silico* methods [12-14], allowing to test hypotheses  
53 about the role of genomic rearrangements in speciation [15]. Specifically theory suggests that  
54 rearranged regions of the genome can facilitate speciation and several empirical studies have  
55 shown that inversions show higher divergence and an enrichment for genetic incompatibilities  
56 between species compared to collinear regions [16-19]. Inversions are also known to facilitate  
57 speciation in the presence of gene flow in different ways: i) allow accumulation of genetic  
58 differences within rearrangements (including genes involved in reproductive isolation) despite  
59 gene flow [20, 21], ii) avoid species fusion after secondary contact [16] and iii) maintain  
60 favorable combinations of locally adapted alleles at different loci favoring spread of  
61 rearrangements [22].

34  
35  
36  
37  
38  
39  
40  
41  
42  
43  
44  
45  
46  
47  
48  
49  
50  
51  
52  
53  
54  
55  
62 Assessment of divergence in regulatory elements and transcription factors between species  
63 contributes to a more complete understanding of the link between genotypes and phenotypes.  
64 This opens the door to investigate the general importance of gene regulation in speciation, as  
65 well as more specific hypotheses such as the role of zinc-finger genes, especially *Krüppel*-type  
66 zinc fingers (KZNFs), a family of transcription factors in species diversification [7]. In addition  
67 to protein-coding regions in the genome, variations in non-coding RNAs (ncRNAs) act as  
68 precursors of speciation through differences in epigenetic mechanisms [23]. These functional  
69 differences are primarily attributed to species-specific diversity of ncRNA classes and structural  
70 evolution in conserved ncRNAs [24-26].

57  
58  
59  
60  
61  
62  
63  
64  
65  
71 The demographic history of recently diverged taxa can now be inferred from genome-wide  
72 sequencing data. Different model-based methods are now available [27], including some that

73 make use of genomic data from a single individual from each species to test for migration as  
74 well as population size changes during divergence [28]. These methodological advances allow  
75 for a better interpretation of the genomic landscape of speciation and the evolutionary processes  
76 involved [29].

77 Lizards provide an excellent model for the study of speciation due to the existing knowledge  
78 on their long-term demographics and adaptive morphologies, in addition to the ease of sample  
79 collection and experimental manipulations [30]. Lizards of the genus *Anolis* have especially  
80 been studied in detail, as their distribution on islands coupled with repeated events of adaptive  
81 radiations offered a perfect framework for evolutionary ecology studies. Not surprisingly, the  
82 first sequenced squamate genome was an anole lizard [31]. Comparative genomic analysis of  
83 *Anolis carolinensis* (anole lizard) with the genomes of birds and mammals was pivotal in  
84 identifying accelerated evolution of egg proteins associated with amniote evolution [31].  
85 Further sauropsid genomes (birds and reptiles) were sequenced in recent years, now covering a  
86 broader taxonomic range of Squamata, Archosauria and Chelonia [32-39]. The study of *Gekko*  
87 *japonicus* (gecko lizard) contributed to the understanding of evolution and adaptation of tail  
88 regeneration, clinging, nocturnal vision and diversification of the olfactory system [34]. In  
89 addition, the genomes of *Pogona vitticeps* (bearded dragon lizard) and *Shinisaurus*  
90 *crocodilurus* (Chinese crocodile lizard) have recently been characterized [32, 35]. However,  
91 comparative genome analyses of closely-related lizard species pairs have only been undertaken  
92 recently in anoles where adaptive evolution of genes related to brain development and behavior  
93 was reported [40].

94 In particular, the family Lacertidae (Sauropsida, Squamata) has been well covered in-terms of  
95 phylogeographic studies, providing important information about the likely timing and  
96 geographic context of speciation [30]. Within this family, the *Lacerta viridis* complex shows  
97 an intricate evolutionary history with secondary contact zones [41, 42]. Here, we focus on the

1  
2  
3  
4  
5 98 divergence between the western clade formally described as *L. bilineata* (corresponding to  
6  
7  
8 99 lineage B) and the eastern clade of *L. viridis* (lineage V) that currently occupy disjoint regions  
9  
10  
11  
12  
13 100 in Europe [42].

14  
15 101 Adult individuals from the two taxa are very similar: throat coloration of hatchlings and early  
16  
17  
18 102 juveniles is the only described diagnostic trait so far [43]. Although ongoing gene flow between  
19  
20  
21  
22 103 these two species was previously hypothesized in studies of allozyme variation [44, 45], recent  
23  
24  
25 104 analyses based on mtDNA and one nuclear marker (fibint7) have cast doubt on the taxonomic  
26  
27  
28 105 classification of the individuals analyzed in those studies [42]. Furthermore, the limited power  
29  
30  
31 106 of these two markers did not provide conclusive evidence either for or against gene flow  
32  
33  
34 107 between *L. viridis* and *L. bilineata*.

35  
36 108 Hybrids between different main lineages within the *L. viridis* complex (northern Italy and  
37  
38  
39 109 Hungary) exhibit reduced fitness under laboratory conditions [46]. This suggests at least partial  
40  
41  
42 110 reproductive isolation between *L. viridis* and *L. bilineata* in the wild which can arise due to  
43  
44  
45 111 BDMIs. This raises the prospect that genomic rearrangements could be involved in the  
46  
47  
48 112 diversification of the *Lacerta viridis* complex [47, 48]. Lizard-specific KZNF genes have  
49  
50  
51 113 recently been predicted [49], making our focal pair of taxa an excellent case study of evolution  
52  
53  
54 114 in this class of genes and their role in speciation between via changes in gene regulatory  
55  
56  
57 115 networks.

58  
59 116 Here we combine short Illumina and long PacBio read sequencing approaches to construct high  
60  
61  
62 117 quality *de novo* genomes for both *L. bilineata* and *L. viridis*, with annotation support from  
63  
64  
65 118 transcriptomic data. We investigated the demographic history of divergence between the two  
66  
67  
68 119 lacertid taxa, performed a broad comparison of genomic features contributing to species  
69  
70  
71 120 divergence and quantified selection in lacertid evolution.

72  
73  
74  
75  
76  
77  
78  
79 121



122

1

2

3

4

5

6

7

8

9

10

11

12

13

14

15

16

17

18

19

20

21

22

23

24

25

26

27

28

29

30

31

32

33

34

35

36

37

38

39

40

41

42

43

44

45

46

47

48

49

50

51

52

53

54

55

56

57

58

59

60

61

62

63

64

65

## 123 **Results**

### 124 **The genomes of *L. viridis* and *L. bilineata***

125 We employed a hybrid strategy of combining Illumina and PacBio sequencing data to produce  
126 separate genome assemblies for the two lacertid species. Genome sequencing coverages of 34x  
127 Illumina and 14x PacBio for *L. viridis*; 37x Illumina and 11x PacBio for *L. bilineata* aided in  
128 the construction of high quality genome assemblies (supplement SI-1; Figure S2, S3). The  
129 assembled lacertid genomes achieved better contiguity than the high coverage illumina-only  
130 contigs of *A. carolinensis* and *G. japonicus* (Table S1). The contig N50's of genomic assemblies  
131 of *L. viridis* and *L. bilineata* were 368kb and 663kb respectively, while the BUSCO  
132 (Benchmarking Universal Single-Copy Orthologs) completeness were 96% and 94%  
133 respectively which was higher than the available lizard genomes. Since the genome of *L. viridis*  
134 had better contiguity than *L. bilineata*, *L. viridis* was used as the reference to predict genomic  
135 variants (structural variants (SVs) and single nucleotide polymorphisms (SNPs) between the  
136 two taxa. There were no observable differences in segmental duplications between the lacertid  
137 genomes (Figure S4). The syntenic blocks between the genomes of *L. viridis* and *L. bilineata*  
138 had an identity of 98.2% (87% represented by pair-wise syntenies). Synteny information was  
139 used to create unordered contig clusters (min. size of 1 Mbp covering one-third of the *L. viridis*  
140 genome) which roughly represent positioning on the same chromosome (Suppl. File S2). The  
141 median synonymous substitution rate (Ks) and non-synonymous substitution rate (Ka) between  
142 the two lacertid species were 0.021 and 0.016 respectively. A divergence time of 2.5-2.9 million  
143 years was estimated between the two species based on 4d-sites.

144 The identical structures of the HOX-cluster between the lacertid species and *A. carolinensis*  
145 confirms the high genomic assembly quality since the HOX-clusters are highly conserved

146 (supplement SI-1). The number of chromosomes and the sex-determination system are different  
147 between anole lizards ( $2n=36$ , 12 macro- and 24 microchromosomes; XY) and lacertid lizards  
148 ( $2n=38$ ; 36 macro- and 2 microchromosomes; ZW) [50, 51]. However, genomic contigs of both  
149 lacertid species were syntenic without breaks or inter-chromosomal transpositions to the macro-  
150 chromosomes of *A. carolinensis* (Figure S2), though the lacertids and anoles split more than  
151 150 Mya. An exception to this was a single *L. viridis* contig which split over two macro-  
152 chromosomes of the *A. carolinensis* genome. This particular contig of *L. viridis* was syntenic  
153 to five separate contigs in *L. bilineata* assembly, demonstrating higher fragmentation in genome  
154 assembly of the latter.

155 The assembled transcripts were crucial for gene annotations since the *ab initio* methods  
156 predicted fragmented proteins and coding sequences (CDS). A majority of the longest *de novo*  
157 assembled transcript isoforms were from the ovarian tissue followed by the brain. Since the  
158 sequencing throughput was highest for the liver tissue in both the species, the formation of  
159 longest isoforms in the ovaries was confirmed as not an artifact of sequencing. We identified  
160 22156 genes in *L. viridis* and 22491 genes in *L. bilineata* supported by *de novo* assembled  
161 transcripts (supplement SI-2; Table S2). The higher number of genes in *L. bilineata* was due to  
162 the fragmentation of genes onto multiple contigs, which can be resolved with scaffolding  
163 information. Compared to *A. carolinensis*, we observed an over-representation of genes in  
164 transfer RNA (tRNA) aminoacylation (Panther release 20170413, fold-enrichment=2.13-2.25,  
165  $p<0.03$ ) and tRNA metabolic process (Panther release 20170413, fold-enrichment=1.84-1.89,  
166  $p<0.003$ ) in both lacertids, indicating an expansion of tRNA-processing genes. Putative Z-  
167 chromosome linked contigs consisted of few non-coding elements (supplement SI-3). The total  
168 length of the contigs assigned to the Z-chromosome in lacertids was longer (13.5-15.6 Mbp)  
169 than the assigned Z-chromosomes of *P. vitticeps* (8 Mbp) but the number of identified genes  
170 were similar (205-221 in lacertids and 219 in *P. vitticeps*) [52].

171 The number of predicted members of the different non-coding RNA classes was similar in *L.*  
172 *viridis* and *L. bilineata* (Table S3). Compared to other selected tetrapod species, there was a  
173 substantial increase in the number of tRNAs (both functional- and pseudo-tRNAs) in the two  
174 lacertid species (Figure S5, S6). However, the number of tRNAs and pseudo-tRNAs are known  
175 to vary significantly in eukaryotes[53]. We found an over-representation of tRNA-processing  
176 genes supported by the expansion of tRNA elements in both lacertid species maintained through  
177 deletion-duplication events within lacertids. miRNA and snoRNA in the lacertids exhibited  
178 losses compared to the *A. carolinensis* (Figure S7, S8). Even though the number of snoRNA  
179 and miRNA were almost identical within lacertids, the members in each ncRNA class  
180 diversified between the two sister species. Repeat content also differed between *L. viridis* and  
181 *L. bilineata*; with the later exhibiting a gain of long-terminal repeat (LTR) elements (Table S5).

## 182 **Demography and gene flow during divergence**

183 Across all sites, mean Heterozygosity was slightly higher in *L. bilineata* than in *L. viridis*  
184 ( $\pi=0.0014$  and  $0.0013$  respectively). Absolute divergence per site between the two species as  
185 measured by  $D_{xy}$  was around  $0.0110$ . These estimates correspond to a pairwise  $F_{ST}$  between *L.*  
186 *viridis* and *L. bilineata* of  $0.77$ .

187 We inferred past divergence and gene flow between the two lacertid species using a likelihood  
188 method based on the site frequency spectrum of short sequence blocks i.e. blockwise site  
189 frequency spectrum (bSFS) [28, 54]. Since the likelihood calculation assumes no recombination  
190 within blocks and an infinite sites mutation model, we partitioned the genome into short (i.e.  
191 200 bases) blocks. Our dataset consisted of 18,059 informative blocks (i.e. not all sites in the  
192 block are missing data), of which a mere 95 were filtered out due to the evidence of  
193 recombination (they contained both shared heterozygous sites and fixed differences which

194 violates the 4-gamete criterion). Less than 1% of the total sites were filtered out due to  
1  
2 195 recombination reducing the average per-site heterozygosity in both species slightly (Table S6).

3  
4  
5 196 The counts of the four entries of the folded joint site frequency spectrum (heterozygous (het.)  
6  
7  
8 197 sites unique to A and B; het. sites shared by A and B; fixed differences) for each block defined  
9  
10 198 304 different configurations, 196 of which appeared more than once in the data.

11  
12  
13  
14 199 We compared the support between different demographic scenarios (Figure 1) that assume  
15  
16 200 either complete isolation or isolation with unidirectional migration between the two lacertid  
17  
18  
19 201 species and co-estimates all parameter under each model (supplement SI-4; Table S7) by  
20  
21 202 maximizing the likelihood across blocks (*Mathematica* code available in supplemental file 3).

22  
23  
24  
25 203 The best model supports gene flow between the two species with the assumption of two  
26  
27 204 different effective population sizes (M4.1 and M4.2). The overall best model (M4.1) supports  
28  
29  
30 205 isolation between the two lacertid species with unidirectional gene flow from *L. viridis* to *L.*  
31  
32 206 *bilineata* and fits significantly better than simpler models without gene flow (or just a single  $N_e$   
33  
34 207 parameter) (Table 1). This model (M4.1) also suggests a larger effective population size of *L.*  
35  
36  
37 208 *bilineata* ( $N_e=29,546$ ) compared to its ancestor and *L. viridis* ( $N_e=14,764$ ) (Table S7 Parameter  
38  
39 209 b) and a migration rate per generation of 0.11 from *L. viridis* to *L. bilineata*.

40  
41  
42  
43 210 Assuming a generation time of 3-3.5 years and a mutation rate of  $1.14e-8$ , our estimate of the  
44  
45 211 split between *L. viridis* and *L. bilineata* corresponds to 2.7-3.05 Mya (Table S8).

#### 48 49 212 **Detection of genomic rearrangements**

50  
51  
52 213 We detected 20,160 genomic rearrangements or structural variants (SVs) longer than 50bp  
53  
54 214 between the two lacertids (Figure 2; Table S9). These rearrangements covered 39.4Mb of the  
55  
56  
57 215 *L. viridis* genome accounting to 2.7% of the genome. These rearranged regions had a higher  
58  
59 216 GC-content (47.1%) compared to regions with no detected rearrangements (44.5%). This

217 contrast in GC-content has been observed in genomic breakpoints, copy-number variants  
218 (CNVs) and somatic rearrangements before [55-58]. 10.8 Mb of the *L. viridis* genome (0.07%)  
219 was detected to be covered with large rearrangements affecting genes (covering the entire  
220 length of more than one gene) compared to *L. bilineata*, but these regions had a slightly smaller  
221 GC (44.4%). These large regions were enriched for RNA-directed DNA polymerase activity  
222 (22.46 fold-enrichment,  $p=5.11e-03$ ).

223 Indels are the most frequent genomic rearrangements mainly affecting introns, repeat elements  
224 and pseudo-tRNAs (supplement SI-5; Table S10). This concedes with the observations made  
225 with respect to SVs in human populations and pigs [13, 59]. Most SVs overlapping exons cover  
226 entire exons and do not result in frame-shift mutations, with the exception of EXD2 and HERC2  
227 which were either non-essential or their functions can be complemented by other genes  
228 (supplement SI-6).

### 229 **Structural selection of ncRNAs**

230  
231 MicroRNAs (miRNA) were the most structurally conserved family of ncRNAs followed by  
232 small non-coding RNAs (snoRNA) (Figure S9). The four types of ncRNAs and the number of  
233 groups in each category are tabulated in Table S11 (supplement SI-7). High levels of diversity  
234 were observed in tRNAs, especially in pseudo-tRNA, which was further supported by high copy  
235 numbers of tRNAs with low conservation between the two lacertid species.

236 All ncRNAs with low diversity across orthologs were computationally tested for sites with  
237 positive selection in either lacertids. The divergent snoRNA families belong to the H/ACA box  
238 class which can introduce change posttranslational mechanisms and pseudouridylation between  
239 the two species [60]. SNORD61 (Small Nucleolar RNA, C/D Box 61) (Figure S10a) was  
240 inferred to have evolved under positive selection in *L. bilineata*. The human ortholog of  
SNORD61 occurs in the intron of a RBMX (RNA binding motif protein, X-linked gene), known

241 to be involved in the dosage compensation and cohesion regulator of sister chromatids [61].  
242 Two microRNAs showed signs of positive selection in *L. viridis*: MIR6516 (mir-6516-3p)  
243 (Figure S10b) associated with urea synthesis[62] and MIR27 (mir-27a and mir27-d) (Figure  
244 S10c) which is known to play a role in regeneration and osteoblast differentiation in mice [63,  
245 64]. However, mir-27d was absent in *L. bilineata*, so the indication of divergence between  
246 lacertids can be due to the presence of an additional MIR27 sequence in *L. viridis*. Two  
247 lincRNAs orthologs (LiNC66 and LiNC29) overlapping with conserved regions across  
248 tetrapods were structurally divergent between the lacertids, since both had high selection scores  
249 and passed the visual filtering (Figure S10d-e).

### 250 **Purifying selection in lacertids**

251 The visual opsins are pivotal for adaptation to diurnal habitats in Squamata [32, 65]. Moreover,  
252 the nocturnal *G. japonicus* lost two of the five functional opsin paralogs [34]. All five paralogs  
253 of visual opsins of *A. carolinensis* (22 transcripts from ENSEMBL) were also present in *L.*  
254 *viridis* and *L. bilineata* (20 transcript sequences), indicating similar diurnal adaptations. We  
255 observed high conservation of SWS1 (opsin) which is crucial for sexual selection [66, 67] and  
256 of the pigmentation protein MC1R linked to adaptive coloration [68] within the lacertids  
257 (supplement SI-8).

### 258 **Varying selection pressures in protein-coding genes between lacertids**

259 Genes involved in neuronal activity, behavior, auditory perception and female reproductive  
260 system development were conserved in the lacertid ancestor i.e. before the split between the  
261 two lacertid species (compared to five other vertebrates as background). Genes with different  
262 selection constraint between the two lacertid species (i.e. difference in purifying selection after  
263 the split between *L. viridis* and *L. bilineata*) were related to brain and neural development,  
264 embryo and cartilage development along with behavioral responses (Table S12).

265 The test for positive selection in either of the lacertid species was performed with branch-site  
266 model of codeml (model M2) using a sub-set of other lizards as background branches. The  
267 number of genes with positively selected sites (PSS) in different foreground branches (*L.*  
*viridis*; *L. bilineata*; or the ancestor of *L. viridis* and *L. bilineata*) are tabulated in the Table S13  
(supplement SI-9). One of the genes with PSS in *L. bilineata* (STAR7) was present on Z-  
chromosome. The predicted ontologies of genes with PSS in either of the two lacertid species  
indicate potential variation in growth and developmental processes, behavioral responses  
(temperature and pH) and transcriptional regulation (Table S14). Three genes (NASP, PDL11  
and RTKN) were positively selected in the ancestor of the lacertid branch compared to  
background branches that include more distant classes such as mammals and birds (supplement  
SI-9, Table S15).

276 The prostacyclin synthase (PTGIS) involved in regeneration through prostaglandin synthesis is  
277 positively selected in *A. carolinensis* and *G. japonicus* [34]. This gene evolved under positive  
278 selection in the lacertid ancestor with *A. carolinensis* and *G. japonicus* as the background,  
279 hinting at evolutionary changes in regenerative mechanisms between lizards.

### 280 **Diversification of UV-responsive genes**

281 We identified three paralogs of the hyaluronidases (HYAL1, HYAL2 and HYAL4) in both the  
282 lacertid genomes. Two genes (STIK1 and HYAL2) coding for proteins in the extra-cellular  
283 matrix of the skin reacting to UV-B light (GO:0071493) [69] were positively selected in  
284 ancestral branch of the lacertids, while the HYAL1 paralog was positively selected in *L. viridis*  
(supplement SI-8). Arylsulfatase gene (ARSB) which is involved in the chondroitin sulfate  
biosynthesis pathway along with HYAL was also positively selected in *L. viridis*. Significant  
pathway enrichment of chondroitin sulfate biosynthesis was observed for PSGs in *L. viridis*  
( $p=2.6e-06$ ,  $q=1.3e-05$ ).

## 289 **Divergence of Kruppel-type zinc-finger proteins and species-specific alternative splicing**

1  
2  
3 290 KRAB-ZNFs or KZNFs (zinc finger proteins with a *Krüppel*-associated box (KRAB)) are  
4  
5  
6 291 transcriptional regulators are confined to tetrapod vertebrates [70] and are known to play a role  
7  
8 292 in reproductive isolation through binding domain differences as well as in the shaping of  
9  
10 293 recombination landscape across the primate genomes [7, 71-74]. To investigate the role of  
11  
12 294 KRAB-ZNFs in the reproductive isolation of our two lacertid species, we compared the KZNF  
13  
14 295 orthologs for differences in their DNA-binding domains and found divergent six orthologous  
15  
16 296 C2H2 zinc-finger proteins (supplement SI-10). Interestingly, all of these KZNFs had their  
17  
18 297 longest transcripts assembled from ovarian tissues (Table S16) and these were not tissue-  
19  
20 298 specific since they were expressed in all the five tissues.

24  
25  
26 299 The genes with significantly varying splice forms between the lacertid species were enriched  
27  
28 300 for spliceosomal activity (supplement SI-10). These differences in alternative splicing were  
29  
30 301 predicted based on the presence of alternative splice junction read support in all the five tissue  
31  
32 302 transcriptomes (brain, heart, liver, kidneys and ovaries).

## 37 303 **Impact of rearrangements on sequence evolution**

38  
39  
40 304 Deletions are the most frequent type of SVs in the genome and occurred on both positively  
41  
42 305 selected and neutrally evolving genes. Duplications and insertions only occurred in genes  
43  
44 306 evolving neutrally while deletions and inversions occurred in genes irrespective of their  
45  
46 307 selective regime. The ratio of regions with rearrangements or SVs to those with no detected  
47  
48 308 rearrangements was different between genes under positive selection and neutrally evolving  
49  
50 309 genes (Boschloo's exact test, two-sided; difference in proportion=0.125,  $p=0.06$ ). This implies  
51  
52 310 low significance in the association of genes under positive selection (PSGs) with SVs. Since  
53  
54 311 this can be due to indels over-showing other categories of SVs due to higher abundance, we  
55  
56 312 tested the individual effect of each SV category with positive selection separately. The  
57  
58  
59  
60  
61  
62  
63  
64  
65



1  
2  
3  
4  
5  
6  
7  
8  
9  
10  
11  
12  
13  
14  
15  
16  
17  
18  
19  
20  
21  
22  
23  
24  
25  
26  
27  
28  
29  
30  
31  
32  
33  
34  
35  
36  
37  
38  
39  
40  
41  
42  
43  
44  
45  
46  
47  
48  
49  
50  
51  
52  
53  
54  
55  
56  
57  
58  
59  
60  
61  
62  
63  
64  
65

313 association between PSGs and each SV category (or rearrangements) was performed with  
314 independent Boschloo exact-tests (Table S17). Tests between different categories of SVs over  
315 PSGs and neutrally evolving genes (NGs) showed significantly higher occurrence of inversions  
316 with PSGs compared to other SV categories ( $p=0.028$ ). These inversions overlapping with  
317 PSGs were independent events on different contigs. We also observed a significant occurrence  
318 of inversions with PSGs over NGs compared to both non-rearranged regions ( $p=0.009$ ) and  
319 collinear regions ( $p=0.006$ ).

320

## 321 Discussion

322 We provide the assembled genomes of two closely-related lacertid species, *L. viridis* and *L.*  
323 *bilineata*, investigated the population history and determined the patterns of genomic  
324 divergence between these species.

325 The error correction of PacBio reads (15-18% error rate) with Illumina data (<0.1% error rate)  
326 provided a clear improvement in the genome assembly. The assembly contiguity was highest  
327 with partial error correction of PacBio reads (without splitting at chimeric junctions) followed  
328 by hybrid assembly through DBG2OLC implementing removal of chimeric joins. This hybrid  
329 assembly strategy aided in generating high quality contig-level genomes with moderate genome  
330 coverages (~35X Illumina and ~15X PacBio). The quality of the lacertid genome assemblies  
331 was higher than the available lizard genomes (Table S1).

332 The estimated time of split between *L. viridis* and *L. bilineata* was 2.7-3.05 Mya which is  
333 similar to the earlier predicted split time of 2.6-3.4 Mya based on mitochondrial genomes which  
334 are 95% identical [41, 75]. The genetic divergence between the two lacertid species ( $F_{ST}=0.77$ )  
335 is slightly higher than between species divergence in primates ( $F_{ST}=0.54-0.74$  between

336 chimpanzees and bonobos) and within species divergence of *L. agilis* populations ( $F_{ST}=0.299$ ).

337 Therefore, our results support the separate species status of *L. viridis* and *L. bilineata*.

338 The best demographic model confirmed unidirectional gene flow predominantly in the direction

339 from *L. viridis* to *L. bilineata*. We also infer a higher effective population size for *L. bilineata*

340 which can be explained by greater population subdivision compared to *L. viridis* [42, 76, 77].

341 The eastern clade (*L. viridis*) possesses smaller effective population size indicating lower

342 genetic diversity in our sampled population (Hungary), in line with previous studies. Another

343 possibility is that *L. viridis* is strongly structured into meta-populations that are affected by local

344 extinction and recolonization events[78].

345 Diversity within various ncRNA classes and adaptive differences in ncRNA orthologs capable

346 of altering their secondary structures are leading factors contributing to evolutionary divergence

347 since varying ncRNA structures imply functional changes [25]. Copy number variation and

348 differences in the content of miRNA families hints at variability in gene regulatory networks

349 between the lacertid sister species. Species-specific splicing mechanisms can be attributed to

350 the losses of snoRNA families (SNORA 17 and SNORA20) in *L. bilineata* and structural

351 changes in SNORD61 whose human ortholog occurs in RBMX gene (catalytic site 2

352 spliceosome) involved in dosage compensation [79]. This is supported by significant

353 enrichment of alternative splicing differences for spliceosomal complex related genes.

354 Although differential alternative splicing was observed in all extracted tissues of both species

355 (without reference bias), this needs to be further investigated with more biological replicates.

356 Positive selection of sites in NASP and PDLIM1 compared to distant background branches

357 including mammals and birds indicate disparate evolutionary changes in both *L. viridis* and *L.*

358 *bilineata* with regard to reproductive processes i.e. spermatogenesis, fertilization and embryo

359 implantation [80-83]. Positive selection of sites in the genes of either lacertid species after their

1  
2  
3  
4  
5  
6  
7  
8  
9  
10  
11  
12  
13  
14  
15  
16  
17  
18  
19  
20  
21  
22  
23  
24  
25  
26  
27  
28  
29  
30  
31  
32  
33  
34  
35  
36  
37  
38  
39  
40  
41  
42  
43  
44  
45  
46  
47  
48  
49  
50  
51  
52  
53  
54  
55  
56  
57  
58  
59  
60  
61  
62  
63  
64  
65

360 split from a common ancestor indicates adaptive differences leading to speciation if selection  
361 occurred before complete reproductive isolation [84-86].

362 UV-reflectance of plumages in birds an important trait in the sexual selection of  
363 morphologically similar sibling species [87]. Sexual selection in *L. viridis* has been linked to  
364 UV-response, males with more UV-reflective patches on the skin are preferably selected by the  
365 females [88, 89]. Hyaluronidases, known to be differentially expressed on exposure to UV-B  
366 in the skin of mice [69, 90, 91] evolve rapidly in lacertids. We speculate that differential  
367 cutaneous response as a result of adaptive differences in chondroitin sulfate (CS) biosynthesis  
368 pathway drives preferential mating in these lacertid species.

369 The divergence of transcription factors, especially differences in DNA-binding regions of  
370 KZNFs as observed here, might have contributed to the reduced reproductive success between  
371 lacertid species. This receives further support from adaptive differences in the transcription  
372 factors (UBIP1 and RPA2) crucial for spermatogonia formation [92, 93]. Varying levels of  
373 purifying selection in genes influencing forebrain development and behavior indicate  
374 dissimilarities between *L. viridis* and *L. bilineata* [94-98]. These differences can arise from  
375 adaptations to varying ecological habitats and environmental conditions [43]. Adaptive changes  
376 in genes involved in habitat preference, behavior and viability after the split of *L. viridis* and *L.*  
377 *bilineata* seem to be elemental in their divergence. Similar observations were made between  
378 species of anoles through selective differences in genes related to behavior and brain  
379 development [40].

380 Genomic regions harboring inversions are known to suppress recombination in  
381 heterokaryotypes [99] facilitating speciation in the presence of gene flow. Genomic inversions  
382 between the two lacertids are significantly associated with positively selected genes and may  
383 play a role in reproductive isolation. In particular, adaptation of genes related to cognitive and

384 reproductive genes (GPR155 and TDRD3) may contribute to reproductive isolation through  
385 association with inversions. Despite observing association of inversions with PSGs which can  
386 lead to reproductive isolation, we are currently unaware of fixed inversion differences between  
387 lacertids.

388 SV-polymorphisms also occur within populations [13] and sequencing of multiple individuals  
389 from different populations of each species is required before drawing far-reaching conclusions.  
390 Assessing the frequencies of these inversions within and between lacertid populations would  
391 be crucial in understanding their relevance to speciation. In addition to a detailed analysis of  
392 the demographic history and evolutionary scenario of European green lizards, our study  
393 provides valuable data that will help establish conservation guidelines for lacertids which are  
394 declining [100] due to habitat loss.

## 396 **Conclusions**

397 We assembled the first high quality genomes of two closely-related species of European green  
398 lizards produced with a cost-effective strategy. Genes related to with transcriptional regulation,  
399 behavior, neural and reproductive development have diversified the most between the lacertids.  
400 Species-specific diversity of ncRNAs, adaptive evolution in regulatory elements and  
401 transcription factors (especially KZNFs) indicate variation in gene regulatory networks  
402 pointing to reproductive isolation between the two species. Preferential mate selection between  
403 lacertids is driven by adaptation of genes responsible for differential cutaneous response to UV-  
404 exposure. Reproductive isolation between *L. viridis* and *L. bilineata* seems to be also driven by  
405 accumulated divergence through inversions and their association with genes under positive  
406 selection. Altogether, we provide a comprehensive study of the evolutionary history; genic,

407 structural and regulatory differences between the genomes of two closely-related lacertid  
1  
2 408 species.  
3  
4  
5

6 409  
7  
8  
9

## 10 410 **Materials and Methods**

### 13 411 **Sampling**

16 412 Two adult females were sampled for this study, a *L. viridis* from Tokaj, north-eastern Hungary  
17  
18 413 (21.39775°E, 48.11363°N) (September 2013) and a *L. bilineata* from Malain, France  
19  
20  
21 414 (4°48'2.01"E, 47°21'16.27"N) (July 2014). There is no known morphological variation  
22  
23  
24 415 between the individuals of the two species (Figure S1). These represent two of the four main  
25  
26 416 clades within the *L. viridis* complex [41, 42, 46, 101]. The specimens were transported in a  
27  
28  
29 417 cotton bag and kept at room temperature over night to avoid extreme stress responses. Tissues  
30  
31 418 from the brain, heart, liver, kidney and ovaries were dissected for tissue-specific transcriptome  
32  
33  
34 419 sequencing and the remaining body tissues were stored separately at -80°C.  
35  
36

### 37 420 **Whole-genome and transcriptome sequencing**

40 421 Tail tissue from each sample was digested with proteinase K and genomic DNA was extracted  
41  
42  
43 422 using a chloroform-based method [102]. The whole genome was sequenced using both short  
44  
45 423 (Illumina) and long read (PacBio) sequencing techniques. Short-read libraries with insert sizes  
46  
47  
48 424 of 380bp and 450bp were prepared for each individual separately. The Illumina paired-end  
49  
50 425 sequences were double-indexed using a multiplexing sequencing protocol [103, 104] on a  
51  
52 426 HiSeq2500. SMRTbell™ template library was prepared according to the instructions from  
53  
54  
55 427 PacificBiosciences, Menlo Park, CA, USA, following the Procedure and Checklist – Greater  
56  
57 428 Than 10 kb Template Preparation. Briefly, for preparation of 15kb libraries 10µg (*L. bilineata*)  
58  
59  
60 429 and 20µg (*L. viridis*) genomic DNA was damage-repaired twice, end-repaired and ligated  
61  
62  
63  
64  
65

1  
2  
3  
4  
5  
6  
7  
8  
9  
10  
11  
12  
13  
14  
15  
16  
17  
18  
19  
20  
21  
22  
23  
24  
25  
26  
27  
28  
29  
30  
31  
32  
33  
34  
35  
36  
37  
38  
39  
40  
41  
42  
43  
44  
45  
46  
47  
48  
49  
50  
51  
52  
53  
54  
55  
56  
57  
58  
59  
60  
61  
62  
63  
64  
65

430 overnight to hairpin adapters applying components from the DNA/Polymerase Binding Kit P6  
431 from Pacific BioSciences, Menlo Park, CA, USA. Reactions were carried out according the  
432 manufacturer's instructions. BluePippin™ Size-Selection to greater than 15kb was performed  
433 according to the manufacturer's instructions (Sage Science, Beverly, MA, USA). Conditions  
434 for annealing of sequencing primers and binding of polymerase to purified SMRTbell™  
435 template were assessed with the Calculator in RS Remote, PacificBiosciences, Menlo Park, CA,  
436 USA. Long-read sequencing was carried out for both genomes with 20 SMRT Cells applying  
437 P6-C4 chemistry on a PacBio RS-II sequencer. Average PacBio read lengths of 14kb and 12kb  
438 were retrieved for *L. viridis* and *L. bilineata*, respectively.

439 RNA from each tissue was extracted using Trizol Reagent (Life Technologies, Carlsbad, CA,  
440 USA) and purified with the RNeasy® Mini Kit (Qiagen, Hilden, Germany). The mRNA was  
441 purified using the Dynabeads® mRNA Purification Kit (Life Technologies, Carlsbad, CA,  
442 USA). The purity and concentration of RNA and cDNA were checked using Nanodrop and  
443 Bioanalyzer 2100 (Agilent Technologies, CA, USA) and fragments of length 200-250bp were  
444 obtained using Ambion® RNA fragmentation reagent. The first and second strands of cDNA  
445 were synthesized using random hexamer primers with SuperScript® II reverse transcriptase  
446 (Life Technologies, Carlsbad, CA, USA) and DNA Polymerase I with RNase H treatment (Life  
447 Technologies, Carlsbad, CA, USA) respectively.

448 *L. viridis* was sequenced on a single lane for a more elaborated estimation of the genome size  
449 and repeat content. In order to avoid lane- and run-biases, sequencing was distributed over three  
450 lanes with all genomes and transcriptomes.

#### 451 **Non-coding RNA (ncRNA) annotation and Repeat analysis**

1  
2 452 Small ncRNAs were annotated on the genomic contigs by performing an infernal cmscan  
3 453 (V1.1.1) using the RFAM covariance models as input and homologous ncRNA genes were  
4  
5 454 filtered with a cut-off of 1e-06 [105, 106].  
6

7  
8 455 Additionally, ncRNA class-specific annotation methods were used for tRNAs, snoRNAs and  
9  
10 456 miRNAs. tRNAs were annotated using tRNAscan-SE with default parameters [107]. The  
11  
12 457 BLAST-based snoStrip pipeline [108] was used to annotate snoRNAs. A comprehensive set of  
13  
14 458 snoRNAs from vertebrates and aves were used as query set [109]. To detect miRNAs, the avian  
15  
16 459 set of miRNAs were used as query sequences for a BLAST search in the lizard genomes. All  
17  
18 460 resulting blast hits were filtered for conservation of the seed region. The annotated snoRNAs  
19  
20 461 and miRNAs in lacertids were validated by blast searches against this reference database and  
21  
22 462 mature miRNA sequence homologies were used. In the case of overlapping miRNA and  
23  
24 463 snoRNA annotations, both were retained as it is known that snoRNAs can be processed into  
25  
26 464 small derived RNAs (sdRNAs) from miRNA-like RNAs [110]. Putative lincRNAs were  
27  
28 465 predicted based on the transcripts with no coding potential as assessed by Transdecoder [111]  
29  
30 466 and mapping on their respective genome without chimeric paths. Furthermore, only the  
31  
32 467 conserved lincRNAs with one-to-one orthologs between lacertids were retained.  
33  
34  
35  
36  
37  
38  
39

40 468 For comparison, ncRNA families (except lincRNA) were also annotated in other selected  
41  
42 469 sauropsid genomes. A reference database was created using sequenced and annotated genomes  
43  
44 470 from reptiles, aves and other vertebrates. The program ePoPe [112] was used to understand the  
45  
46 471 evolution of snoRNAs and miRNAs in the lacertids through the construction of phylogenetic  
47  
48 472 trees based on the gains and losses of ncRNA families.  
49  
50  
51  
52

53 473 The Repeatmodeler pipeline [113] was used to predict repeats in the genomes of lacertids. The  
54  
55 474 predicted repeat-families were used as initial libraries for *de novo* annotation of repeats using  
56  
57 475 Repeatmasker [114]. The evolution of these repeats was investigated using the repeat library  
58  
59 476 available for tetrapod species (Database: 20140131).  
60  
61  
62  
63  
64  
65

## 477 **Population histories, gene flow and coalescence**

1  
2  
3 478 To infer the history of divergence and gene flow between *L. viridis* and *L. bilineata* we used  
4  
5 479 the blockwise composite likelihood approach. We analytically computed the probabilities of  
6  
7  
8 480 mutational configurations in blocks of fixed length using the blockwise site frequency spectrum  
9  
10 481 (bSFS) framework [28].

11  
12  
13 482 We mapped the illumina reads from *L. viridis* and *L. bilineata* to the *L. viridis* genome as  
14  
15  
16 483 reference with BWA mem [115]. The homozygosity/heterozygosity of each site in both  
17  
18 484 lacertids was predicted based on the reference genome with freebayes [116] with a minimum  
19  
20  
21 485 read support of 5. For each block of length 200 bp, we counted the number of the four mutation  
22  
23 486 types defined by the joint SFS (Figure 3). We then summarized the frequency of each  
24  
25  
26 487 polymorphism pattern across all blocks [117, 118]. This data summary is referred to as  
27  
28 488 distribution of bSFS.

29  
30  
31 489 Blocks containing both fixed differences and shared heterozygous sites, violate the 4-gametes  
32  
33  
34 490 criterion and were removed given the assumption of no recombination within blocks. To correct  
35  
36 491 for the extent of linkage disequilibrium which includes correlation between adjacent blocks, we  
37  
38  
39 492 followed a conservative approach for the correction of maximum-likelihood of each model in  
40  
41 493 every 114 blocks. We fitted seven different demographic scenarios (Figure 2): divergence with  
42  
43 494 the same effective population sizes in two separated populations and their ancestor (M1),  
44  
45  
46 495 divergence with different effective population sizes in one lineage compared to its ancestor  
47  
48 496 (M2.1, M2.2), divergence with continuous unidirectional gene flow with fixed effective  
49  
50  
51 497 population size (M3.1, M3.2), and divergence with continuous unidirectional gene flow with  
52  
53 498 different effective population sizes in one lineage compared to its ancestor (M4.1, M4.2). The  
54  
55  
56 499 best fitting scenario was chosen based on the difference in composite Log likelihoods between  
57  
58 500 models.



501 To calculate the time of split between *L. viridis* and *L. bilineata*, we assumed a mutation rate of  
1  
2 502 1.14e-08 based on the within-lineage divergence estimate of *L. viridis* from the pairwise  
3  
4 503 distances of cytochrome *b* gene [42]. This assumption was similar to the estimation of mutation  
5  
6  
7 504 rate in *A. carolinensis* [119]. No published estimate of the generation time for *L. viridis* and *L.*  
8  
9 505 *bilineata*. However, this can be calculated approximately as the mean age of the mothers of all  
10  
11 506 offspring [120] given the age structure data by Elbing [121] and Saint Girons *et al.* [122] for  
12  
13 507 three German populations of *L. viridis* and two French populations of *L. bilineata*, respectively.  
14  
15  
16 508 In captivity, females that breed for the first time lay on average 8.5 eggs, whereas older females  
17  
18 509 lay 11.1 eggs [123]. Given this data we estimated a mean generation length of 3.6 and 2.9 years  
19  
20  
21 510 for *L. viridis* and *L. bilineata*, respectively. We therefore assumed a generation time of about  
22  
23  
24 511 3-3.5 years for both species.

## 512 **Detection of genomic rearrangements from read-based pipelines and syntenic blocks**

513 Genomic rearrangements between the lacertids were detected based on both read-based  
514 methods and syntenic blocks information. *L. viridis* was used as the reference genome since the  
515 assembly was more contiguous. Genomic reads from *L. bilineata* were used as the query and  
516 the reads of *L. viridis* mapped against the reference were used as control.

517 ***Read-based pipelines:*** Genomic rearrangements were detected between lacertids using read  
518 mapping based methods for Illumina paired-end reads and for PacBio-reads separately,  
519 followed by SV callers specifically developed to deal with short and long read sequences,  
520 respectively. In both approaches, reads of *L. bilineata* (query) and of *L. viridis* (control) were  
521 separately mapped against the same reference (*L. viridis*).

522 The alignment of Illumina reads was carried out with BWA mem [115] and rearrangements  
523 were detected with MetaSV [124] pipeline which uses Breakdancer [125] to infer structural  
524 variants (SVs) using paired-end read information, CNVnator [126] to predict copy-number

525 variants (CNVs) from abnormal read-coverages and Pindel [127] to detect large SV-related  
1  
2 526 breakpoint events. The insert-size was estimated as  $400\pm 50$  from one million observations  
3  
4  
5 527 based on the alignment of paired-end Illumina reads. A minimum support of five reads and  
6  
7 528 mapping quality of 30 was set as the threshold to support SVs from Breakdancer. A bin-size of  
8  
9  
10 529 500 was used to run CNVnator and only precise SV-events were called. While for Pindel, only  
11  
12 530 variants with minimum read support of 5 paired-reads were used. MetaSV pipeline was used to  
13  
14 531 merge the SVs from these three different SV-callers and local *de novo* assemblies were  
15  
16  
17 532 constructed using the ABYSS assembler for insertions. In order to maintain a high level of  
18  
19 533 sensitivity and specificity (>90%) in the detection of SVs, only the rearrangements called with  
20  
21  
22 534 a minimum support of 8 uniquely mapped paired-end reads were used for further analyses  
23  
24 535 [128].

27 536 The PacBio reads were aligned to the reference with NGMLR and the alignment was fed to  
28  
29  
30 537 Sniffles SV-caller [12] to call variants with a minimum support of seven reads (atleast half of  
31  
32 538 the PacBio genome coverage of 14X).

35 539 ***Syntenic blocks approach:*** In addition to read-based methods, rearrangements were also  
36  
37  
38 540 detected from the blocks of synteny obtained through the UCSC pipeline [129]. The alignments  
39  
40 541 were converted to single-coverage genomes using `single_cov2` of the MultiZ pipeline [130] to  
41  
42  
43 542 avoid spurious assignments. Strand changes within syntenic blocks were clustered as inversions  
44  
45 543 (I) based on the orientation of the successive (I+1) and preceding (I-1) blocks. Regions with  
46  
47  
48 544 missing bases in the query alone were predicted to be deletions while gaps in the reference  
49  
50 545 genome alone were considered as insertions. Additionally, Hierarchical Alignment (HAL)  
51  
52 546 format [131] of the single-coverage genomes was used to predict rearrangements with  
53  
54  
55 547 `halBranchMutations` tool. This tool generates annotations for the location of rearrangements  
56  
57 548 based on the branch of interest in the HAL file (between *L. viridis* and *L. bilineata* in our case).  
58  
59  
60 549 The events detected with in both directions i.e. *L. viridis* reference with *L. bilineata* as query

1  
2 550 and *L. bilineata* reference and *L. viridis* as query were retained. The length threshold was set to  
3  
4 551 50bp and the predicted rearrangements were filtered based on quality to reduce false-positives  
5 552 (supplement SM-7).  
6

7  
8 553 Segmental duplications in the two lacertid species were detected by self-aligning the two  
9  
10 554 genomes separately with chained LASTZ[132] (step=9, H=3000, K=5000). High identity  
11  
12 555 matches (90% identity) within each genome of 1kb or more were defined as segmental  
13  
14 556 duplications.  
15  
16

### 17 18 557 **Structural selection in non-coding RNAs (ncRNA)** 19 20

21  
22 558 The predicted ncRNAs (miRNA, snoRNA, tRNA and lincRNA) in lacertids were tested for  
23  
24 559 structural selection (selection of sites acting on secondary structure in either of the lacertids)  
25  
26 560 with *G. japonicus* as outgroup. We used the Selection on the Secondary Structure test (SSS-  
27  
28 561 test) [133], a statistical test that assigns selection scores for each given sequence based on the  
29  
30 562 comparison between the structure of the given sequence and the structure of group consensus.  
31  
32  
33 563 It also provides a diversity value for the family that indicates its structural conservation. The  
34  
35 564 diversity value (d-score) is the family's median vase-pair distance to its consensus. The  
36  
37 565 miRNAs, snoRNAs and tRNAs were divided into sub-groups based on their families or their  
38  
39 566 anti-codon sequences, and only those sub-groups with at least three sequences were tested. The  
40  
41 567 groups that exhibited high structural diversity (median base pair distance to the consensus,  
42  
43 568  $d \geq 10.0$ ) were excluded from further analyses.  
44  
45  
46  
47  
48

49 569 A ncRNA structural test to detect positively selected structures is only appropriate for  
50  
51 570 structurally conserved groups. Low d-score values ( $d < 10.0$ ) were used to distinguish  
52  
53 571 conservation chosen based on structural uniformity of the groups. This cut-off was based on the  
54  
55 572 visual inspection of the secondary structures of families with d-scores of 1 to 20. Secondary  
56  
57 573 structures of ncRNA sequences were predicted using RNAfold [134]. In a similar fashion,  
58  
59  
60  
61  
62  
63  
64  
65

574 structures with selection scores of 0 to 30 were visually compared to the structure of their group  
1  
2 575 consensus. High selection scores ( $s \geq 10.0$ ) were used to predict the positively selected sequences  
3  
4 576 of small ncRNAs. Secondary structures with high selection scores were manually inspected to  
5  
6  
7 577 remove false positives. Specifically, the candidates with structures of low stability or those  
8  
9  
10 578 fundamentally dissimilar to the family consensus indicating loss of function were excluded.

11  
12 579 The selection test was adapted for lincRNAs and performed only on the two lacertid species  
13  
14  
15 580 without any outgroup since lincRNA annotations of other closely-related species were  
16  
17  
18 581 unavailable. Since positive selection of secondary structure cannot be determined without  
19  
20 582 outgroups, we instead detected divergence of lincRNA structure within the lacertids. Local  
21  
22 583 conserved structure blocks were predicted for the orthologous lincRNA families and these  
23  
24  
25 584 blocks were subjected to an adaptation of SSS-test based on local structures. The structural  
26  
27 585 selection for lincRNAs was assessed locally, since most base-pairings occur between  
28  
29  
30 586 nucleotides within a short distance [133, 135]. Local blocks of high structural diversity were  
31  
32 587 excluded from further analysis. Since outgroups were not used for lincRNAs, a lower selection  
33  
34  
35 588 score threshold ( $s \geq 4.0$ ) was applied to detect divergent candidates which were visually  
36  
37 589 inspected later to exclude false-positives.

#### 40 590 **Ortholog prediction and selection tests**

41  
42  
43 591 In order to investigate the selection pressure in the lacertid branch (ancestor of *L. viridis* and *L.*  
44  
45  
46 592 *bilineata*) compared to other vertebrates, the coding sequences (CDS) of five species, namely  
47  
48  
49 593 anole lizard (*Anolis carolinensis*), chicken (*Gallus gallus*), frog (*Xenopus tropicalis*), spotted  
50  
51 594 gar fish (*Lepisosteus oculatus*) and human (*Homo sapiens*) were downloaded from the Ensembl  
52  
53 595 database version 83 [136]. To keep the data consistent and avoid re-annotations, the CDS  
54  
55  
56 596 annotations were also extracted from the Ensembl database. The orthologs between the coding  
57  
58 597 sequences of the species were identified with ProteinOrtho V5 using the synteny option to  
59  
60  
61 598 reduce false orthologs assignments. The output was converted to run the POTION pipeline

599 [137] which tests for selection acting on protein coding genes. Only the single-copy orthologs  
1  
2 600 in each species was retained for each orthologous group.  
3

4  
5 601 The protein identity filtering in POTION was set to 30% in each orthologous group and  
6  
7 602 sequence size limits to more than 10 times or less than 0.2 of the median size in the group. Only  
8  
9 603 groups with at least 4 species were retained. The sequences in each orthologous group (after  
10  
11 604 filtering paralogs) were aligned, gap trimmed, phylogenetic trees were constructed and groups  
12  
13 605 with recombinants were excluded from the selection tests. The intermediates files from the  
14  
15 606 POTION pipeline were used to generate unrooted trees with lacertids (*L. viridis* and *L.*  
16  
17 607 *bilineata*) in the foreground branches. The remaining species were used as the background to  
18  
19 608 test for positive-selection using branch-site model of codeml within the PAML package[138].  
20  
21 609 A likelihood ratio test (LRT) based on  $\chi^2$  distribution was used to detect genes with significant  
22  
23 610 positive selection followed by multiple testing through Benjamini–Hochberg (BH) procedure.  
24  
25 611 Genes with  $p < 0.05$  and  $q < 0.05$  were retained and referred to as being positively selected in the  
26  
27 612 lacertid branch.  
28  
29  
30  
31  
32  
33  
34

35 613 To detect adaptive evolution through positive selection within either lacertids, additional tests  
36  
37 614 (PAML branch-site models) were performed with less distant outgroups using a set of five  
38  
39 615 lizard species, namely *L. viridis*, *L. bilineata*, *Anolis carolinensis*, *Gekko japonicus* and *Pogona*  
40  
41 616 *vitticeps*. The single-copy orthologs were identified with ProteinOrtho with a minimum protein  
42  
43 617 identity of 70%, e-value of 1e-06 and minimum similarity of 0.99 for additional hits. The  
44  
45 618 orthologous coding sequences from the five lizard species were aligned with MACSE while  
46  
47 619 accounting for frame-shifts and the stop codon at the end of the sequence was removed.  
48  
49 620 Unrooted trees were generated with three different foreground branches: i) lacertids (*L. viridis*  
50  
51 621 and *L. bilineata*) ii) *L. viridis* alone and iii) *L. bilineata* alone. The rest of the workflow for  
52  
53 622 detection of recombinants, removal of gaps and codeml tests was similar to the POTION  
54  
55 623 pipeline followed by filtering for significant candidate genes ( $p < 0.05$ ,  $q < 0.05$ ). In order to  
56  
57  
58  
59  
60  
61  
62  
63  
64  
65

624 avoid false predictions of positively selected sites (PSS) at the beginning or towards the end of  
1  
2 625 alignments, where mismatches were allowed, the candidate genes predicted to contain PSS in  
3  
4  
5 626 either species were visually inspected.  
6  
7

8 627  
9

## 12 628 **Data Access**

16 629 The genome assembly, transcript data, DNA and RNA sequencing reads have been deposited  
17  
18 630 in the European Nucleotide Archive under the Bioproject PRJEB24178.  
19  
20

22 631 GCA\_900245905 - *L. viridis* genome assembly  
23

24 632 GCA\_900245895 - *L. bilineata* genome assembly  
25  
26

28 633 The transcript assemblies, genome browser and online BLAST databases for the lacertid data  
29  
30 634 are hosted at <http://lacerta.bioinf.uni-leipzig.de>  
31  
32

34 635 Genome annotations, variant calls (VCFs) and other supporting datasets are available at  
35  
36 636 <http://doi.org/10.5281/zenodo.1219810>  
37  
38  
39

40 637  
41  
42

## 44 638 **Declarations**

## 48 639 **Acknowledgements**

50 640 The authors thank Ms. A. Grimm for the sample collection and providing the pictures of the  
51  
52 641 lacertids; Dr. C. Helm, Dr. D. Bernhard, Dr. M. Gerth, Mr. R. Wolf and Mr. S. Schaffer for  
53  
54 642 their help in the laboratory; Prof. S. Hoffmann and Dr. T. Hackl for valuable discussions and  
55  
56  
57 643 Mr. S. Peyr egne for helpful suggestions and proofreading. The specimen from Hungary was  
58  
59 644 kindly collected and provided by the team of Dr. Szabolcs Lengyel, Centre for Ecological  
60  
61  
62  
63  
64  
65

645 Research, Hungarian Academy of Science. Capture permit (No. 13778-7/ 2013) was issued by  
646 the North Hungarian Environmental Protection, Nature Conservation and Water Management  
647 Inspectorate. Capture permit (No. 36) for the French specimen was issued by the Préfet de la  
648 Côte d’Or. RF was financed by FCT [grant number SFRH/BPD/89313/2012] and is currently  
649 funded by the European Union’s Horizon 2020 research and innovation programme, under the  
650 Marie Skłodowska-Curie grant agreement number 706376.

### 651 **Funding**

652 This project was funded by the Deutsche Forschungsgemeinschaft (FZT 118).

### 653 **Declaration of interest**

654 The authors report no conflicts of interest. The authors alone are responsible for the content and  
655 writing of the paper.

### 656 **Additional files**

657 Additional file 1: This supplement contains methods SM1-SM12, information S11-SI10,  
658 Figures S1–S10, Tables S1–S17 and References.

659 Additional file 2: The figure for the contig clusters in lacertids generated from synteny  
660 information between *L. viridis* and *L. bilineata*.

661 Additional file 3,4: *Mathematica* notebooks containing the code used and other supporting  
662 information from the demography analysis of *L. viridis* and *L. bilineata*.

663

664

665

666

667 **References**

- 1
- 2
- 3 668 1. Coyne JA, Orr HA: **Speciation**: Sinauer Associates; 2004.
- 4 669 2. Orr HA: **Dobzhansky, Bateson, and the Genetics of Speciation**. *Genetics* 1996, **144**(4):1331-
- 5 670 1335.
- 6 671 3. Presgraves DC: **The molecular evolutionary basis of species formation**. *Nat Rev Genet* 2010,
- 7 672 **11**(3):175-180.
- 8 673 4. Charlesworth B, Coyne JA, H. Barton N: **The Relative Rates of Evolution of Sex Chromosomes**
- 9 674 **and Autosomes**. *American naturalist* 1987, **130**(1):113-146.
- 10 675 5. Masly JP, Presgraves DC: **High-resolution genome-wide dissection of the two rules of**
- 11 676 **speciation in Drosophila**. *PLoS Biol* 2007, **5**(9):e243.
- 12 677 6. Mack KL, Campbell P, Nachman MW: **Gene regulation and speciation in house mice**. *Genome*
- 13 678 *Res* 2016, **26**(4):451-461.
- 14 679 7. Nowick K, Carneiro M, Faria R: **A prominent role of KRAB-ZNF transcription factors in**
- 15 680 **mammalian speciation?** *Trends Genet* 2013, **29**(3):130-139.
- 16 681 8. Ortiz-Barrientos D, Kane NC: **Meeting review: American Genetics Association Symposium on**
- 17 682 **the genetics of speciation**. *Mol Ecol* 2007, **16**(14):2852-2854.
- 18 683 9. Mayr E: **Wu's genic view of speciation**. *Journal of Evolutionary Biology* 2001, **14**(6):866-867.
- 19 684 10. Chung W, Ting C-T: **Genes and speciation**. *Nature reviews Genetics* 2004, **5**(2):114.
- 20 685 11. Seehausen O, Butlin RK, Keller I, Wagner CE, Boughman JW, Hohenlohe PA, Peichel CL, Saetre
- 21 686 GP, Bank C, Brannstrom A *et al*: **Genomics and the origin of species**. *Nat Rev Genet* 2014,
- 22 687 **15**(3):176-192.
- 23 688 12. Sedlazeck FJ, Rescheneder P, Smolka M, Fang H, Nattestad M, von Haeseler A, Schatz MC:
- 24 689 **Accurate detection of complex structural variations using single-molecule sequencing**.
- 25 690 *Nature Methods* 2018.
- 26 691 13. Sudmant PH, Rausch T, Gardner EJ, Handsaker RE, Abyzov A, Huddleston J, Zhang Y, Ye K, Jun
- 27 692 G, Hsi-Yang Fritz M *et al*: **An integrated map of structural variation in 2,504 human genomes**.
- 28 693 *Nature* 2015, **526**(7571):75-81.
- 29 694 14. Alkan C, Coe BP, Eichler EE: **Genome structural variation discovery and genotyping**. *Nat Rev*
- 30 695 *Genet* 2011, **12**(5):363-376.
- 31 696 15. Davey JW, Barker SL, Rastas PM, Pinharanda A, Martin SH, Durbin R, McMillan WO, Merrill RM,
- 32 697 Jiggins CD: **No evidence for maintenance of a sympatric Heliconius species barrier by**
- 33 698 **chromosomal inversions**. *Evolution Letters* 2017, **1**(3):138-154.
- 34 699 16. Noor MA, Grams KL, Bertucci LA, Reiland J: **Chromosomal inversions and the reproductive**
- 35 700 **isolation of species**. *Proc Natl Acad Sci U S A* 2001, **98**(21):12084-12088.
- 36 701 17. Navarro A, Barton NH: **Chromosomal speciation and molecular divergence--accelerated**
- 37 702 **evolution in rearranged chromosomes**. *Science* 2003, **300**(5617):321-324.
- 38 703 18. Kirkpatrick M: **How and why chromosome inversions evolve**. *PLoS Biol* 2010, **8**(9).
- 39 704 19. McGaugh SE, Noor MA: **Genomic impacts of chromosomal inversions in parapatric**
- 40 705 **Drosophila species**. *Philos Trans R Soc Lond B Biol Sci* 2012, **367**(1587):422-429.
- 41 706 20. Lohse K, Clarke M, Ritchie MG, Etges WJ: **Genome-wide tests for introgression between**
- 42 707 **cactophilic Drosophila implicate a role of inversions during speciation**. *Evolution* 2015,
- 43 708 **69**(5):1178-1190.
- 44 709 21. Navarro A, Barton NH: **Accumulating postzygotic isolation genes in parapatry: a new twist on**
- 45 710 **chromosomal speciation**. *Evolution* 2003, **57**(3):447-459.
- 46 711 22. Kirkpatrick M, Barton N: **Chromosome inversions, local adaptation and speciation**. *Genetics*
- 47 712 2006, **173**(1):419-434.
- 48 713 23. Frías-Lasserre D, Villagra CA: **The Importance of ncRNAs as Epigenetic Mechanisms in**
- 49 714 **Phenotypic Variation and Organic Evolution**. *Frontiers in Microbiology* 2017, **8**:2483.
- 50 715 24. Walter Costa MB, Honer Zu Siederdisen C, Tulpan D, Stadler PF, Nowick K: **Temporal ordering**
- 51 716 **of substitutions in RNA evolution: Uncovering the structural evolution of the Human**
- 52 717 **Accelerated Region 1**. *J Theor Biol* 2017, **438**:143-150.



- 718 25. Bhartiya D, Scaria V: **Genomic variations in non-coding RNAs: Structure, function and regulation.** *Genomics* 2016, **107**(2-3):59-68.
- 1 719
- 2 720 26. Gardner PP, Fasold M, Burge SW, Ninova M, Hertel J, Kehr S, Steeves TE, Griffiths-Jones S, Stadler PF: **Conservation and losses of non-coding RNAs in avian genomes.** *PLoS One* 2015, **10**(3):e0121797.
- 3 721
- 4 722
- 5 723 27. Sousa V, Hey J: **Understanding the Origin of Species with Genome-Scale Data: the Role of Gene Flow.** *Nature reviews Genetics* 2013, **14**(6):404-414.
- 6 724
- 7 725 28. Lohse K, Chmelik M, Martin SH, Barton NH: **Efficient Strategies for Calculating Blockwise Likelihoods Under the Coalescent.** *Genetics* 2016, **202**(2):775-786.
- 8 726
- 9 727 29. Ravinet M, Faria R, Butlin RK, Galindo J, Bierne N, Rafajlović M, Noor MAF, Mehlig B, Westram AM: **Interpreting the genomic landscape of speciation: a road map for finding barriers to gene flow.** *Journal of Evolutionary Biology* 2017, **30**(8):1450-1477.
- 10 728
- 11 729 30. Camargo A, Sinervo B, Sites JW, Jr.: **Lizards as model organisms for linking phylogeographic and speciation studies.** *Mol Ecol* 2010, **19**(16):3250-3270.
- 12 730
- 13 731 31. Alföldi J, Di Palma F, Grabherr M, Williams C, Kong L, Mauceli E, Russell P, Lowe CB, Glor RE, Jaffe JD *et al*: **The genome of the green anole lizard and a comparative analysis with birds and mammals.** *Nature* 2011, **477**(7366):587-591.
- 14 732
- 15 733 32. Gao J, Li Q, Wang Z, Zhou Y, Martelli P, Li F, Xiong Z, Wang J, Yang H, Zhang G: **Sequencing, de novo assembling, and annotating the genome of the endangered Chinese crocodile lizard *Shinisaurus crocodilurus*.** *GigaScience* 2017, **6**(7):1-6.
- 16 734
- 17 735 33. Rice ES, Kohno S, John JS, Pham S, Howard J, Lareau LF, O'Connell BL, Hickey G, Armstrong J, Deran A *et al*: **Improved genome assembly of American alligator genome reveals conserved architecture of estrogen signaling.** *Genome Res* 2017, **27**(5):686-696.
- 18 736
- 19 737 34. Liu Y, Zhou Q, Wang Y, Luo L, Yang J, Yang L, Liu M, Li Y, Qian T, Zheng Y *et al*: **Gekko japonicus genome reveals evolution of adhesive toe pads and tail regeneration.** 2015, **6**:10033.
- 20 738
- 21 739 35. Georges A, Li Q, Lian J, O'Meally D, Deakin J, Wang Z, Zhang P, Fujita M, Patel HR, Holleley CE *et al*: **High-coverage sequencing and annotated assembly of the genome of the Australian dragon lizard *Pogona vitticeps*.** *GigaScience* 2015, **4**(1):45.
- 22 740
- 23 741 36. Castoe T, Koning A, Hall K, Card D, Schield D, Fujita M: **The Burmese python genome reveals the molecular basis for extreme adaptation in snakes.** *Proc Natl Acad Sci U S A* 2013, **110**.
- 24 742
- 25 743 37. Vonk F, Casewell N, Henkel C, Heimberg A, Jansen H, McCleary R: **The king cobra genome reveals dynamic gene evolution and adaptation in the snake venom system.** *Proc Natl Acad Sci U S A* 2013, **110**.
- 26 744
- 27 745 38. Shaffer H, Minx P, Warren D, Shedlock A, Thomson R, Valenzuela N: **The western painted turtle genome, a model for the evolution of extreme physiological adaptations in a slowly evolving lineage.** *Genome Biol* 2013, **14**.
- 28 746
- 29 747 39. Wang Z, Pascual-Anaya J, Zadissa A, Li W, Niimura Y, Huang Z: **The draft genomes of soft-shell turtle and green sea turtle yield insights into the development and evolution of the turtle-specific body plan.** *Nat Genet* 2013, **45**.
- 30 748
- 31 749 40. Tollis M, Hutchins ED, Stapley J, Rupp SM, Eckalbar WL, Maayan I, Lasku E, Infante CR, Dennis SR, Robertson JA *et al*: **Comparative Genomics Reveals Accelerated Evolution in Conserved Pathways during the Diversification of Anole Lizards.** *Genome Biology and Evolution* 2018, **10**(2):489-506.
- 32 750
- 33 751 41. Böhme MU, Fritz U, Kotenko T, Georg D, Ljubisavljević K, Tzankov N, Berendonk TU: **Phylogeography and cryptic variation within the *Lacerta viridis* complex (Lacertidae, Reptilia).** *Zoologica Scripta* 2007, **36**(2):119-131.
- 34 752
- 35 753 42. Marzahn E, Mayer W, Joger U, Ilgaz Ç, Jablonski D, Kindler C, Kumlutaş Y, Nistri A, Schneeweiss N, Vamberger M *et al*: **Phylogeography of the *Lacerta viridis* complex: mitochondrial and nuclear markers provide taxonomic insights.** *Journal of Zoological Systematics and Evolutionary Research* 2016, **54**(2):85-105.
- 36 754
- 37 755
- 38 756
- 39 757
- 40 758
- 41 759
- 42 760
- 43 761
- 44 762
- 45 763
- 46 764
- 47 765
- 48 766
- 49 767
- 50
- 51
- 52
- 53
- 54
- 55
- 56
- 57
- 58
- 59
- 60
- 61
- 62
- 63
- 64
- 65

- 768 43. Tvrtkovi N, Lazar B, Tome S, Grbac I: **The western green lizard *Lacerta (viridis) bilineata* Daudin, 1804 (Sauria: Lacertidae) in Slovenia and Croatia.** *Natura Croatica* 1998, **7**(4):363-369.
- 1 769
- 2 770
- 3 771 44. Amann T, Rykena S, Joger U, Nettmann HK, Veith M: **Zur artlichen Trennung von *Lacerta bilineata* DAUDIN, 1802 und *L. viridis* (LAURENTI, 1768)** *Salamandra* 1997, **33**(4):255-268.
- 4 772
- 5 773 45. Joger U, Amann T, Veith M: **Phylogeographie und genetische differenzierung im *Lacerta viridis/bilineata* komplex.** *Mertensiella* 2001, **13**:60-68.
- 6 774
- 7 775 46. Rykena S: **Kreuzungsexperimente zur Prüfung der Artgrenzen im Genus *Lacerta* sensu stricto.** *Zoosystematics And Evolution* 1991, **67**(1):55-68.
- 8 775
- 9 776
- 10 777 47. Olmo E: **Rate of chromosome changes and speciation in reptiles.** *Genetica* 2005, **125**(2-3):185-203.
- 11 777
- 12 778
- 13 779 48. Kupriyanova L, Kuksin A, Odierna G: **Karyotype, chromosome structure, reproductive modalities of three Southern Eurasian populations of the common lacertid lizard, *Zootoca vivipara* (Jacquin, 1787).** *Acta Herpetologica; Vol 3, No 2 (2008)* 2008.
- 14 780
- 15 781
- 16 782 49. Liu H, Chang LH, Sun Y, Lu X, Stubbs L: **Deep Vertebrate Roots for Mammalian Zinc Finger Transcription Factor Subfamilies.** *Genome Biol Evol* 2014, **6**(3):510-525.
- 17 783
- 18 784 50. Chiarelli AB, Capanna E: **Cytotaxonomy and Vertebrate Evolution Edited by A.B. Chiarelli and E. Capanna; 1973.**
- 19 784
- 20 785
- 21 786 51. Olmo E, Odierna G, Cobror O: **C-band variability and phylogeny of Lacertidae.** *Genetica* 1986, **71**:63-74.
- 22 787
- 23 788 52. Deakin JE, Edwards MJ, Patel H, O'Meally D, Lian J, Stenhouse R, Ryan S, Livernois AM, Azad B, Holleley CE *et al*: **Anchoring genome sequence to chromosomes of the central bearded dragon (*Pogona vitticeps*) enables reconstruction of ancestral squamate macrochromosomes and identifies sequence content of the Z chromosome.** *BMC Genomics* 2016, **17**:447.
- 24 789
- 25 790
- 26 791
- 27 791 53. Bermudez-Santana C, Attolini CS-O, Kirsten T, Engelhardt J, Prohaska SJ, Steigele S, Stadler PF: **Genomic organization of eukaryotic tRNAs.** *BMC Genomics* 2010, **11**(1):270.
- 28 792
- 29 793
- 30 794
- 31 795 54. Bunnefeld L, Frantz LA, Lohse K: **Inferring Bottlenecks from Genome-Wide Samples of Short Sequence Blocks.** *Genetics* 2015, **201**(3):1157-1169.
- 32 796
- 33 797 55. Bauters M, Van Esch H, Friez MJ, Boespflug-Tanguy O, Zenker M, Vianna-Morgante AM, Rosenberg C, Ignatius J, Raynaud M, Hollanders K *et al*: **Nonrecurrent MECP2 duplications mediated by genomic architecture-driven DNA breaks and break-induced replication.** *Genome Research* 2008, **18**(6):847-858.
- 34 797
- 35 798
- 36 799
- 37 800
- 38 801 56. Froyen G, Belet S, Martinez F, Santos-Rebouças Cíntia B, Declercq M, Verbeeck J, Donckers L, Berland S, Mayo S, Rosello M *et al*: **Copy-Number Gains of HUWE1 Due to Replication- and Recombination-Based Rearrangements.** *American Journal of Human Genetics* 2012, **91**(2):252-264.
- 39 801
- 40 802
- 41 803
- 42 804
- 43 805 57. Fukami M, Tsuchiya T, Vollbach H, Brown KA, Abe S, Ohtsu S, Wabitsch M, Burger H, Simpson ER, Umezawa A *et al*: **Genomic Basis of Aromatase Excess Syndrome: Recombination- and Replication-Mediated Rearrangements Leading to CYP19A1 Overexpression.** *The Journal of Clinical Endocrinology and Metabolism* 2013, **98**(12):E2013-E2021.
- 44 806
- 45 807
- 46 807
- 47 808
- 48 809 58. Drier Y, Lawrence MS, Carter SL, Stewart C, Gabriel SB, Lander ES, Meyerson M, Beroukheim R, Getz G: **Somatic rearrangements across cancer reveal classes of samples with distinct patterns of DNA breakage and rearrangement-induced hypermutability.** *Genome Research* 2013, **23**(2):228-235.
- 49 810
- 50 811
- 51 811
- 52 812
- 53 813 59. Zhao P, Li J, Kang H, Wang H, Fan Z, Yin Z, Wang J, Zhang Q, Wang Z, Liu J-F: **Structural Variant Detection by Large-scale Sequencing Reveals New Evolutionary Evidence on Breed Divergence between Chinese and European Pigs.** 2016, **6**:18501.
- 54 814
- 55 815
- 56 816 60. Kiss T, Fayet-Lebaron E, Jádý BE: **Box H/ACA Small Ribonucleoproteins.** *Molecular Cell* 2010, **37**(5):597-606.
- 57 816
- 58 817
- 59
- 60
- 61
- 62
- 63
- 64
- 65

- 818 61. Matsunaga S, Takata H, Morimoto A, Hayashihara K, Higashi T, Akatsuchi K, Mizusawa E,  
1 819 Yamakawa M, Ashida M, Matsunaga TM *et al*: **RBMX: a regulator for maintenance and**  
2 820 **centromeric protection of sister chromatid cohesion.** *Cell Rep* 2012, **1**(4):299-308.
- 3 821 62. Sun R-P, Xi Q-Y, Sun J-J, Cheng X, Zhu Y-L, Ye D-Z, Chen T, Wei L-M, Ye R-S, Jiang Q-Y *et al*: **In**  
4 822 **low protein diets, microRNA-19b regulates urea synthesis by targeting SIRT5.** *Scientific*  
5 823 *Reports* 2016, **6**:33291.
- 7 824 63. Wang T, Xu Z: **miR-27 promotes osteoblast differentiation by modulating Wnt signaling.**  
8 825 *Biochem Biophys Res Commun* 2010, **402**(2):186-189.
- 9 826 64. Clevers H, Loh KM, Nusse R: **Stem cell signaling. An integral program for tissue renewal and**  
10 827 **regeneration: Wnt signaling and stem cell control.** *Science* 2014, **346**(6205):1248012.
- 11 828 65. Ricklefs RE, Losos JB, Townsend TM: **Evolutionary diversification of clades of squamate**  
12 829 **reptiles.** *J Evol Biol* 2007, **20**(5):1751-1762.
- 14 830 66. van Hazel I, Sabouhanian A, Day L, Endler JA, Chang BSW: **Functional characterization of**  
15 831 **spectral tuning mechanisms in the great bowerbird short-wavelength sensitive visual**  
16 832 **pigment (SWS1), and the origins of UV/violet vision in passerines and parrots.** *BMC*  
17 833 *Evolutionary Biology* 2013, **13**:250-250.
- 19 834 67. de Lanuza GPI, Font E: **Ultraviolet vision in lacertid lizards: evidence from retinal structure,**  
20 835 **eye transmittance, SWS1 visual pigment genes and behaviour.** *The Journal of Experimental*  
21 836 *Biology* 2014, **217**(16):2899.
- 22 837 68. Laurent S, Pfeifer SP, Settles ML, Hunter SS, Hardwick KM, Ormond L, Sousa VC, Jensen JD,  
23 838 Rosenblum EB: **The population genomics of rapid adaptation: disentangling signatures of**  
24 839 **selection and demography in white sands lizards.** *Molecular Ecology* 2016, **25**(1):306-323.
- 26 840 69. Tobiishi M, Sayo T, Yoshida H, Kusaka A, Kawabata K, Sugiyama Y, Ishikawa O, Inoue S: **Changes**  
27 841 **in epidermal hyaluronan metabolism following UVB irradiation.** *Journal of Dermatological*  
28 842 *Science* 2011, **64**(1):31-38.
- 29 843 70. Urrutia R: **KRAB-containing zinc-finger repressor proteins.** *Genome Biol* 2003, **4**.
- 30 844 71. Wolfe SA, Nekludova L, Pabo CO: **DNA recognition by Cys2His2 zinc finger proteins.** *Annu Rev*  
31 845 *Biophys Biomol Struct* 2000, **29**.
- 33 846 72. Englbrecht CC, Schoof H, Böhm S: **Conservation, diversification and expansion of C2H2 zinc**  
34 847 **finger proteins in the Arabidopsis thaliana genome.** *BMC Genomics* 2004, **5**(1):39.
- 35 848 73. Emerson RO, Thomas JH: **Adaptive evolution in zinc finger transcription factors.** *PLoS Genet*  
36 849 2009, **5**(1):e1000325.
- 38 850 74. Nowick K, Fields C, Gernat T, Caetano-Anolles D, Kholina N, Stubbs L: **Gain, loss and divergence**  
39 851 **in primate zinc-finger genes: a rich resource for evolution of gene regulatory differences**  
40 852 **between species.** *PLoS One* 2011, **6**(6):e21553.
- 41 853 75. Kolora SR, Faria R, Weigert A, Schaffer S, Grimm A, Henle K, Sahyoun AH, Stadler PF, Nowick K,  
42 854 Bleidorn C *et al*: **The complete mitochondrial genome of *Lacerta bilineata* and comparison**  
43 855 **with its closely related congener *L. viridis*.** *Mitochondrial DNA Part A* 2017, **28**(1):116-118.
- 45 856 76. Eyre-Walker A, Keightley PD, Smith NGC, Gaffney D: **Quantifying the Slightly Deleterious**  
46 857 **Mutation Model of Molecular Evolution.** *Molecular Biology and Evolution* 2000, **19**(12):2142-  
47 858 2149.
- 48 859 77. Charlesworth B: **Effective population size and patterns of molecular evolution and variation.**  
49 860 *Nat Rev Genet* 2009, **10**(3):195-205.
- 51 861 78. Maruyama T, Kimura M: **Genetic variability and effective population size when local**  
52 862 **extinction and recolonization of subpopulations are frequent.** *Proceedings of the National*  
53 863 *Academy of Sciences of the United States of America* 1980, **77**(11):6710-6714.
- 54 864 79. Sperveslage J, Hoffmeister M, Henopp T, Klöppel G, Sipos B: **Establishment of robust controls**  
55 865 **for the normalization of miRNA expression in neuroendocrine tumors of the ileum and**  
56 866 **pancreas.** *Endocrine* 2014, **46**(2):226-230.
- 58 867 80. Finn RM, Ellard K, Eirin-Lopez JM, Ausio J: **Vertebrate nucleoplasmin and NASP: egg histone**  
59 868 **storage proteins with multiple chaperone activities.** *FASEB J* 2012, **26**(12):4788-4804.

- 869 81. Nagatomo H, Kohri N, Akizawa H, Hoshino Y, Yamauchi N, Kono T, Takahashi M, Kawahara M: **Requirement for nuclear autoantigenic sperm protein mRNA expression in bovine preimplantation development.** *Anim Sci J* 2016, **87**(3):457-461.
- 1 870
- 2 871
- 3 872 82. Shang Y, Wang H, Jia P, Zhao H, Liu C, Liu W, Song Z, Xu Z, Yang L, Wang Y *et al*: **Autophagy regulates spermatid differentiation via degradation of PDLIM1.** *Autophagy* 2016, **12**(9):1575-1592.
- 4 873
- 5 874
- 6 875 83. Yin J, Ni B, Tian ZQ, Yang F, Liao WG, Gao YQ: **Regulatory effects of autophagy on spermatogenesis.** *Biol Reprod* 2017, **96**(3):525-530.
- 7 876
- 8 877 84. Chen J, Shishkin AA, Zhu X, Kadri S, Maza I, Guttman M, Hanna JH, Regev A, Garber M: **Evolutionary analysis across mammals reveals distinct classes of long non-coding RNAs.** *Genome Biol* 2016, **17**:19.
- 9 878
- 10 879
- 11 880 85. Wiberg RA, Halligan DL, Ness RW, Necsulea A, Kaessmann H, Keightley PD: **Assessing Recent Selection and Functionality at Long Noncoding RNA Loci in the Mouse Genome.** *Genome Biol Evol* 2015, **7**(8):2432-2444.
- 12 881
- 13 882
- 14 883 86. Zhen Y, Andolfatto P: **Methods to detect selection on noncoding DNA.** *Methods Mol Biol* 2012, **856**:141-159.
- 15 884
- 16 885 87. Bleiweiss R: **Ultraviolet plumage reflectance distinguishes sibling bird species.** *Proceedings of the National Academy of Sciences of the United States of America* 2004, **101**(47):16561.
- 17 886
- 18 887 88. Bajer K, Molnár O, Török J, Herczeg G: **Female European green lizards (*Lacerta viridis*) prefer males with high ultraviolet throat reflectance.** *Behavioral Ecology and Sociobiology* 2010, **64**(12):2007-2014.
- 19 888
- 20 889
- 21 890 89. Bajer K, Molnár O, Török J, Herczeg G: **Ultraviolet nuptial colour determines fight success in male European green lizards (*Lacerta viridis*).** *Biology Letters* 2011, **7**(6):866-868.
- 22 891
- 23 892 90. Averbek M, Gebhardt CA, Voigt S, Beilharz S, Anderegg U, Termeer CC, Sleeman JP, Simon JC: **Differential Regulation of Hyaluronan Metabolism in the Epidermal and Dermal Compartments of Human Skin by UVB Irradiation.** *Journal of Investigative Dermatology* 2007, **127**(3):687-697.
- 24 893
- 25 894
- 26 895
- 27 896 91. Kurdykowski S, Mine S, Bardey V, Danoux L, Jeanmaire C, Pauly G, Brabencova E, Wegrowski Y, Maquart FX: **Ultraviolet-B irradiation induces differential regulations of hyaluronidase expression and activity in normal human keratinocytes.** *Photochem Photobiol* 2011, **87**(5):1105-1112.
- 28 897
- 29 898
- 30 899
- 31 900 92. Elmayan T, Proux F, Vaucheret H: **Arabidopsis RPA2: a genetic link among transcriptional gene silencing, DNA repair, and DNA replication.** *Curr Biol* 2005, **15**(21):1919-1925.
- 32 901
- 33 902 93. Kim JS, Chae JH, Cheon YP, Kim CG: **Reciprocal localization of transcription factors YY1 and CP2c in spermatogonial stem cells and their putative roles during spermatogenesis.** *Acta Histochem* 2016, **118**(7):685-692.
- 34 903
- 35 904
- 36 905 94. Mengesdorf T, Proud CG, Mies G, Paschen W: **Mechanisms underlying suppression of protein synthesis induced by transient focal cerebral ischemia in mouse brain.** *Exp Neurol* 2002, **177**(2):538-546.
- 37 906
- 38 907
- 39 908 95. Sfakianos MK, Eisman A, Gourley SL, Bradley WD, Scheetz AJ, Settleman J, Taylor JR, Greer CA, Williamson A, Koleske AJ: **Inhibition of Rho via Arg and p190RhoGAP in the postnatal mouse hippocampus regulates dendritic spine maturation, synapse and dendrite stability, and behavior.** *J Neurosci* 2007, **27**(41):10982-10992.
- 40 909
- 41 910
- 42 911
- 43 912 96. Jacquet BV, Muthusamy N, Sommerville LJ, Xiao G, Liang H, Zhang Y, Holtzman MJ, Ghashghaei HT: **Specification of a Foxj1-dependent lineage in the forebrain is required for embryonic-to-postnatal transition of neurogenesis in the olfactory bulb.** *J Neurosci* 2011, **31**(25):9368-9382.
- 44 913
- 45 914
- 46 915 97. Huang Y, Xu Z, Cao J, Cao H, Zhang S: **The expression of FOXJ1 in neurogenesis after transient focal cerebral ischemia.** *Can J Neurol Sci* 2013, **40**(3):403-409.
- 47 916
- 48 917 98. Lu B, Gehrke S, Wu Z: **RNA metabolism in the pathogenesis of Parkinsons disease.** *Brain Res* 2014, **1584**:105-115.
- 49 918
- 50 919 99. Rieseberg LH, Burke JM: **A genic view of species integration.** *Journal of Evolutionary Biology* 2001, **14**(6):883-886.
- 51 920
- 52
- 53
- 54
- 55
- 56
- 57
- 58
- 59
- 60
- 61
- 62
- 63
- 64
- 65

- 921 100. Böhme MU, Schneeweiß N, Fritz U, Schlegel M, Berendonk TU: **Small edge populations at risk: genetic diversity of the green lizard (*Lacerta viridis viridis*) in Germany and implications for conservation management.** *Conservation Genetics* 2007, **8**(3):555-563.
- 1 922
- 2 923
- 3 924 101. Joger U, Fritz U, Guicking D, Kalyabina-Hauf S, Nagy ZT, Wink M: **Phylogeography of western Palaeartic reptiles – Spatial and temporal speciation patterns.** *Zoologischer Anzeiger - A Journal of Comparative Zoology* 2007, **246**(4):293-313.
- 4 925
- 5 926
- 6 927 102. Weigert A, Helm C, Meyer M, Nickel B, Arendt D, Hausdorf B, Santos SR, Halanych KM, Purschke G, Bleidorn C *et al*: **Illuminating the base of the annelid tree using transcriptomics.** *Mol Biol Evol* 2014, **31**(6):1391-1401.
- 7 928
- 8 929
- 9 930 103. Kircher M, Sawyer S, Meyer M: **Double indexing overcomes inaccuracies in multiplex sequencing on the Illumina platform.** *Nucleic Acids Res* 2012, **40**(1):e3.
- 10 931
- 11 932 104. Meyer M, Kircher M: **Illumina sequencing library preparation for highly multiplexed target capture and sequencing.** *Cold Spring Harb Protoc* 2010, **2010**(6):pdb prot5448.
- 12 933
- 13 934 105. Nawrocki EP, Eddy SR: **Infernal 1.1: 100-fold faster RNA homology searches.** *Bioinformatics* 2013, **29**(22):2933-2935.
- 14 935
- 15 936 106. Nawrocki EP, Burge SW, Bateman A, Daub J, Eberhardt RY, Eddy SR, Floden EW, Gardner PP, Jones TA, Tate J *et al*: **Rfam 12.0: updates to the RNA families database.** *Nucleic Acids Res* 2015, **43**(Database issue):D130-137.
- 16 937
- 17 938
- 18 939 107. Lowe TM, Eddy SR: **tRNAscan-SE: a program for improved detection of transfer RNA genes in genomic sequence.** *Nucleic Acids Res* 1997, **25**.
- 19 940
- 20 941 108. Bartschat S, Kehr S, Tafer H, Stadler PF, Hertel J: **snoStrip: a snoRNA annotation pipeline.** *Bioinformatics* 2014, **30**(1):115-116.
- 21 942
- 22 943 109. Jorjani H, Kehr S, Jedlinski DJ, Gumienny R, Hertel J, Stadler PF, Zavolan M, Gruber AR: **An updated human snoRNAome.** *Nucleic Acids Res* 2016, **44**(11):5068-5082.
- 23 944
- 24 945 110. Taft RJ, Glazov EA, Lassmann T, Hayashizaki Y, Carninci P, Mattick JS: **Small RNAs derived from snoRNAs.** *RNA* 2009, **15**(7):1233-1240.
- 25 946
- 26 947 111. Haas BJ, Papanicolaou A, Yassour M, Grabherr M, Blood PD, Bowden J, Couger MB, Eccles D, Li B, Lieber M *et al*: **De novo transcript sequence reconstruction from RNA-Seq: reference generation and analysis with Trinity.** *Nature protocols* 2013, **8**(8):10.1038/nprot.2013.1084.
- 27 948
- 28 949 112. Hertel J, Stadler PF: **The Expansion of Animal MicroRNA Families Revisited.** *Life (Basel)* 2015, **5**(1):905-920.
- 29 950
- 30 951
- 31 952 113. Smit A, Hubley R: **RepeatModeler Open-1.0.** 2008-2015.
- 32 953
- 33 954 114. Smit A, Hubley R, Green P: **RepeatMasker Open-4.0.** 2013-2015.
- 34 955
- 35 956 115. Li H: **Aligning sequence reads, clone sequences and assembly contigs with BWA-MEM.** *arXiv:13033997* 2013.
- 36 957
- 37 958 116. Garrison E, Marth G: **Haplotype-based variant detection from short-read sequencing.** *arXiv preprint* 2012, **arXiv:1207.3907** ([q-bio.GN]\*).
- 38 959
- 39 960 117. Lohse K, Harrison RJ, Barton NH: **A general method for calculating likelihoods under the coalescent process.** *Genetics* 2011, **189**(3):977-987.
- 40 961
- 41 962 118. Nurnberger B, Lohse K, Fijarczyk A, Szymura JM, Blaxter ML: **Para-allopatry in hybridizing fire-bellied toads (*Bombina bombina* and *B. variegata*): Inference from transcriptome-wide coalescence analyses.** *Evolution* 2016, **70**(8):1803-1818.
- 42 963
- 43 964 119. Tollis M, Ausubel G, Ghimire D, Boissinot S: **Multi-Locus Phylogeographic and Population Genetic Analysis of *Anolis carolinensis*: Historical Demography of a Genomic Model Species.** *PLoS One* 2012, **7**(6):e38474.
- 44 965
- 45 966 120. Caughley G: **Parameters for Seasonally Breeding Populations.** *Ecology* 1967, **48**(5):834-839.
- 46 967
- 47 968 121. Elbing K: **Zur Wiederbesiedlung brandgeschädigter Teilhabitate durch Smaragdeidechsen (*Lacerta viridis*).** *Salamandra* 2000, **36**(3):175-184.
- 48 969
- 49 970 122. Saint Girons H, Castanet J, Bradshaw D, Baron J-P: **Démographie comparée de deux populations françaises de *Lacerta viridis* (Laurenti, 1768).** *Journal of Ecology* 1989, **44**(4):361-386.
- 50 971
- 51 972 123. Rykena S, Nettmann HK: ***Lacerta viridis* (Laurenti, 1768) – Smaragdeidechse, vol. 2; 1984.**
- 52 973
- 53 974
- 54 975
- 55 976
- 56 977
- 57 978
- 58 979
- 59 980
- 60 981
- 61 982
- 62 983
- 63 984
- 64 985
- 65 986

973 124. Mohiyuddin M, Mu JC, Li J, Bani Asadi N, Gerstein MB, Abyzov A, Wong WH, Lam HY: **MetaSV: an accurate and integrative structural-variant caller for next generation sequencing.** *Bioinformatics* 2015, **31**(16):2741-2744.

1 974

2 975

3 976 125. Chen K, Wallis JW, McLellan MD, Larson DE, Kalicki JM, Pohl CS, McGrath SD, Wendl MC, Zhang Q, Locke DP *et al*: **BreakDancer: an algorithm for high-resolution mapping of genomic structural variation.** *Nat Methods* 2009, **6**(9):677-681.

4 977

5 978

6 979 126. Abyzov A, Urban AE, Snyder M, Gerstein M: **CNVnator: an approach to discover, genotype, and characterize typical and atypical CNVs from family and population genome sequencing.** *Genome Res* 2011, **21**(6):974-984.

7 979

8 980

9 981

10 982 127. Ye K, Schulz MH, Long Q, Apweiler R, Ning Z: **Pindel: a pattern growth approach to detect break points of large deletions and medium sized insertions from paired-end short reads.** *Bioinformatics* 2009, **25**(21):2865-2871.

11 982

12 983

13 984

14 985 128. Xie C, Tammi MT: **CNV-seq, a new method to detect copy number variation using high-throughput sequencing.** *BMC Bioinformatics* 2009, **10**:80-80.

15 986

16 987 129. Kent WJ, Baertsch R, Hinrichs A, Miller W, Haussler D: **Evolution's cauldron: duplication, deletion, and rearrangement in the mouse and human genomes.** *Proc Natl Acad Sci U S A* 2003, **100**(20):11484-11489.

17 988

18 989

19 990 130. Blanchette M, Kent WJ, Riemer C, Elnitski L, Smit AF, Roskin KM, Baertsch R, Rosenbloom K, Clawson H, Green ED *et al*: **Aligning multiple genomic sequences with the threaded blockset aligner.** *Genome Res* 2004, **14**(4):708-715.

20 990

21 991

22 992

23 993 131. Hickey G, Paten B, Earl D, Zerbino D, Haussler D: **HAL: a hierarchical format for storing and analyzing multiple genome alignments.** *Bioinformatics* 2013, **29**(10):1341-1342.

24 993

25 994

26 995 132. Harris R: **Improved pairwise alignment of genomic DNA.** . *Ph.D. Thesis.* The Pennsylvania State University.; 2007.

27 996

28 997 133. Walter Costa MB, Höner zu Siederdisen C, Stadler PF, Nowick K: **SSS-test: a novel test for detecting selection on the secondary structures of non-coding RNAs. (submitted).** *Nucleic Acids Res* 2017.

29 998

30 999

31 1000 134. Lorenz R, Bernhart SH, Höner zu Siederdisen C, Tafer H, Flamm C, Stadler PF, Hofacker IL: **ViennaRNA Package 2.0.** *Algorithms for Molecular Biology* 2011, **6**(1):26.

32 1000

33 1001

34 1002 135. Lange SJ, Maticzka D, Mohl M, Gagnon JN, Brown CM, Backofen R: **Global or local? Predicting secondary structure and accessibility in mRNAs.** *Nucleic Acids Res* 2012, **40**(12):5215-5226.

35 1003

36 1004 136. Yates A, Akanni W, Amode MR, Barrell D, Billis K, Carvalho-Silva D, Cummins C, Clapham P, Fitzgerald S, Gil L *et al*: **Ensembl 2016.** *Nucleic Acids Res* 2016, **44**(D1):D710-716.

37 1004

38 1005

39 1006 137. Hongo JA, de Castro GM, Cintra LC, Zerlotini A, Lobo FP: **POTION: an end-to-end pipeline for positive Darwinian selection detection in genome-scale data through phylogenetic comparison of protein-coding genes.** *BMC Genomics* 2015, **16**:567.

40 1007

41 1008

42 1009 138. Yang Z: **PAML 4: phylogenetic analysis by maximum likelihood.** *Mol Biol Evol* 2007, **24**(8):1586-1591.

43 1009

44 1010

45 1011

46 1011

47 1012

48 1012

49 1013

50 1013

51 1013

52 1014

53 1014

54 1014

55 1015

56 1015

57 1015

58 1015

59 1015

60 1015

61 1015

62 1015

63 1015

64 1015

65 1015

## 1016 **Figure Legends**

1  
2  
3  
4  
5  
6  
7  
8  
9  
10  
11  
12  
13  
14  
15  
16  
17  
18  
19  
20  
21  
22  
23  
24  
25  
26  
27  
28  
29  
30  
31  
32  
33  
34  
35  
36  
37  
38  
39  
40  
41  
42  
43  
44  
45  
46  
47  
48  
49  
50  
51  
52  
53  
54  
55  
56  
57  
58  
59  
60  
61  
62  
63  
64  
65

1017 Figure 1. Demographic models for the divergence between *L. viridis* and *L. bilineata*.  
1018 Divergence at time T with different  $N_e$  in one group (M2.1, M2.2) and divergence at time T  
1019 with continuous unidirectional gene flow with different  $N_e$  in one group (M4.1, M4.2). The  
1020 grey area indicates gene flow between both species and the similar shading of the branches  
1021 indicates similar effective population sizes ( $N_e$ ).  $N_{A,B}$  - effective population size compared to  
1022 ancestor, T - split time.

1023  
1024 Figure 2. Total counts and length ranges (in bp) of genomic rearrangements of SVs between *L.*  
1025 *viridis* and *L. bilineata*. The counts are represented by bars and length ranges by whiskers (y-  
1026 axis is log10-scaled). The rearrangements plotted are categorized into deletions (DEL),  
1027 duplications (DUP), insertions (INS) and inversions (INV).

1028  
1029 Figure 3. The folded blockwise site frequency spectrum (bSFS). The variation in alleles  
1030 represented by different colours (the ancestral state showed in red). Given a single genealogy  
1031 (a diploid genome from two populations can form six possible genealogies), each block contains  
1032 four mutation types: i) unique heterozygous sites in *L. bilineata*, ii) unique heterozygous sites  
1033 in *L. viridis*, iii) shared heterozygous sites between *L. viridis* and *L. bilineata* or iv) homozygous  
1034 sites which are different between *L. viridis* and *L. bilineata* i.e. homozygous fixed differences.  
1035 The bSFS (spectrum of SFS) has been calculated by counting the number of occurrences of  
1036 each SFS.

1038 **Tables**

1  
2

3 1039 Table 1. Comparison of different demographic models for divergence between *L. viridis* and *L. bilineata*.

4  
5 1040 The  $\Delta$  in log likelihood of each model is given relative to the best model. V - *L. viridis*, B - *L. bilineata*.

6  
7 1041 ‘ $\rightarrow$ ’ indicates the direction of gene flow between the two species; 2Ne - two different effective

8  
9 1042 population sizes assumed; IM - isolation with migration; DIV<sub>V</sub> - divergence without gene flow assuming

10  
11 1043 dissimilar effective population size in *L. viridis* compared to the lacertid ancestor and *L. bilineata*; DIV<sub>B</sub>

12  
13 1044 - divergence without gene flow assuming dissimilar effective population size in *L. bilineata* compared

14  
15 1045 to the lacertid ancestor and *L. viridis*.

16  
17  
18  
19

| <b>M2 (without gene flow)</b> |                | <b>M4 (presence of gene flow)</b>      |                                        |
|-------------------------------|----------------|----------------------------------------|----------------------------------------|
| <b>DIV2NeV</b>                | <b>DIV2NeB</b> | <b>IM2NeV<math>\rightarrow</math>B</b> | <b>IM2NeB<math>\rightarrow</math>V</b> |
| -9.44                         | -9.45          | 0                                      | -3.04                                  |
| -12.1                         | -12.0          | 0                                      | -1.27                                  |
| -16.9                         | -16.7          | 0                                      | -1.16                                  |

20  
21  
22  
23  
24  
25  
26  
27  
28  
29  
30  
31  
32  
33 1046

34  
35  
36  
37  
38  
39  
40  
41  
42  
43  
44  
45  
46  
47  
48  
49  
50  
51  
52  
53  
54  
55  
56  
57  
58  
59  
60  
61  
62  
63  
64  
65



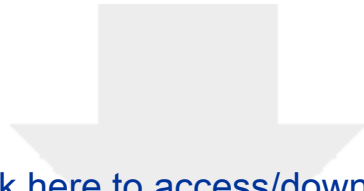

[Click here to access/download](#)

**Supplementary Material**

[Lacertids\\_Manuscript-Gigascience\\_Supplement.pdf](#)

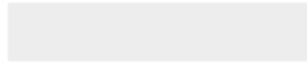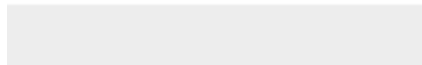

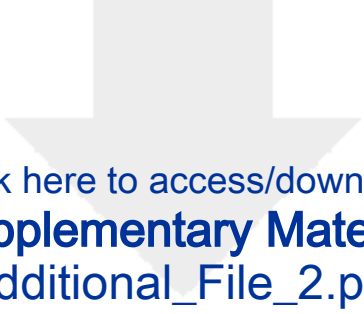

Click here to access/download  
**Supplementary Material**  
Additional\_File\_2.pdf





Click here to access/download  
**Supplementary Material**  
Figure\_1.svg



Click here to access/download  
**Supplementary Material**  
Figure\_2.svg



Click here to access/download  
**Supplementary Material**  
Figure\_3.svg



Click here to access/download  
**Supplementary Material**  
Additional\_file\_3.nb



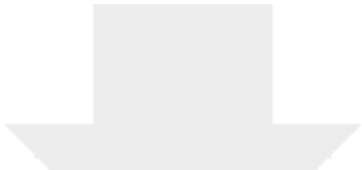

Click here to access/download  
**Supplementary Material**  
Additional\_file\_4.nb



Supplement: giy160_giga-d-18-00173_original_submission.pdf [file giy160_giga-d-18-00173_original_submission.pdf]
