# Supplementary material for: Divergent evolution in the genomes of closely related lacertids, Lacerta viridis and L. bilineata, and implications for speciation
Source: PubMed Central journal article supplement (PMC6381762; doi:10.1093/gigascience/giy160), 2018-12-10
Supplement: giy160_giga-d-18-00173_revision_1.pdf [file giy160_giga-d-18-00173_revision_1.pdf]

## Divergent evolution in the genomes of closely-related lacertids, *Lacerta viridis* and *L. bilineata* and implications for speciation

--Manuscript Draft--

|                                                      |                                                                                                                                                                                                                                                                                                                                                                                                                                                                                                                                                                                                                                                                                                                                                                                                                                                                                                                                                                                                                                                                                                                                                                                                                                                                                                                                                                                                                                                                                                                                                                                                                                                                                                                                                                                                                                                                                                                                                                                                                                                                                                                                                                                   |                     |
|------------------------------------------------------|-----------------------------------------------------------------------------------------------------------------------------------------------------------------------------------------------------------------------------------------------------------------------------------------------------------------------------------------------------------------------------------------------------------------------------------------------------------------------------------------------------------------------------------------------------------------------------------------------------------------------------------------------------------------------------------------------------------------------------------------------------------------------------------------------------------------------------------------------------------------------------------------------------------------------------------------------------------------------------------------------------------------------------------------------------------------------------------------------------------------------------------------------------------------------------------------------------------------------------------------------------------------------------------------------------------------------------------------------------------------------------------------------------------------------------------------------------------------------------------------------------------------------------------------------------------------------------------------------------------------------------------------------------------------------------------------------------------------------------------------------------------------------------------------------------------------------------------------------------------------------------------------------------------------------------------------------------------------------------------------------------------------------------------------------------------------------------------------------------------------------------------------------------------------------------------|---------------------|
| <b>Manuscript Number:</b>                            | GIGA-D-18-00173R1                                                                                                                                                                                                                                                                                                                                                                                                                                                                                                                                                                                                                                                                                                                                                                                                                                                                                                                                                                                                                                                                                                                                                                                                                                                                                                                                                                                                                                                                                                                                                                                                                                                                                                                                                                                                                                                                                                                                                                                                                                                                                                                                                                 |                     |
| <b>Full Title:</b>                                   | Divergent evolution in the genomes of closely-related lacertids, <i>Lacerta viridis</i> and <i>L. bilineata</i> and implications for speciation                                                                                                                                                                                                                                                                                                                                                                                                                                                                                                                                                                                                                                                                                                                                                                                                                                                                                                                                                                                                                                                                                                                                                                                                                                                                                                                                                                                                                                                                                                                                                                                                                                                                                                                                                                                                                                                                                                                                                                                                                                   |                     |
| <b>Article Type:</b>                                 | Research                                                                                                                                                                                                                                                                                                                                                                                                                                                                                                                                                                                                                                                                                                                                                                                                                                                                                                                                                                                                                                                                                                                                                                                                                                                                                                                                                                                                                                                                                                                                                                                                                                                                                                                                                                                                                                                                                                                                                                                                                                                                                                                                                                          |                     |
| <b>Funding Information:</b>                          | Deutsche Forschungsgemeinschaft (FZT118)                                                                                                                                                                                                                                                                                                                                                                                                                                                                                                                                                                                                                                                                                                                                                                                                                                                                                                                                                                                                                                                                                                                                                                                                                                                                                                                                                                                                                                                                                                                                                                                                                                                                                                                                                                                                                                                                                                                                                                                                                                                                                                                                          | Dr. Martin Schlegel |
| <b>Abstract:</b>                                     | <p><b>Background:</b> <i>Lacerta viridis</i> and <i>L. bilineata</i> are sister species of European green lizards (eastern and western clades respectively), which until recently were grouped together as the <i>L. viridis</i> complex. Genetic incompatibilities were observed between lacertid populations through crossing experiments, which led to the delineation of two separate species within the <i>L. viridis</i> complex. The population history of these sister species and processes driving divergence are unknown. We constructed high quality de novo genome assemblies for both <i>L. viridis</i> and <i>L. bilineata</i> through Illumina and PacBio sequencing, with annotation support provided from transcriptome sequencing of several tissues. To estimate gene flow between the two species and identify factors involved in reproductive isolation, we studied their evolutionary history, identified genomic rearrangements, detected signature of selection on non-coding RNA and protein-coding genes.</p> <p><b>Findings:</b> Here we show that the gene flow was primarily unidirectional from <i>L. bilineata</i> to <i>L. viridis</i> after their split at least 1.15 Mya. We detected positive selection of the non-coding repertoire; mutations in transcription factors; accumulation of divergence through inversions; selection on genes involved in neural development, reproduction and behavior, as well as in UV-response possibly driven by sexual selection, whose contribution to reproductive isolation between these lacertid species need to be further evaluated.</p> <p><b>Conclusion:</b> The combination of short and long sequence reads resulted in one of the most complete lizard genome assemblies. The characterization of a diverse array of genomic features provided valuable insights into the demographic history of divergence among European green lizards, as well as key species differences, some of which are candidates that could have played a role in speciation. In addition, our study generated valuable genomic resources that can be used to address conservation related issue in lacertids.</p> |                     |
| <b>Corresponding Author:</b>                         | Sree Rohit Raj Kolora<br><br>GERMANY                                                                                                                                                                                                                                                                                                                                                                                                                                                                                                                                                                                                                                                                                                                                                                                                                                                                                                                                                                                                                                                                                                                                                                                                                                                                                                                                                                                                                                                                                                                                                                                                                                                                                                                                                                                                                                                                                                                                                                                                                                                                                                                                              |                     |
| <b>Corresponding Author Secondary Information:</b>   |                                                                                                                                                                                                                                                                                                                                                                                                                                                                                                                                                                                                                                                                                                                                                                                                                                                                                                                                                                                                                                                                                                                                                                                                                                                                                                                                                                                                                                                                                                                                                                                                                                                                                                                                                                                                                                                                                                                                                                                                                                                                                                                                                                                   |                     |
| <b>Corresponding Author's Institution:</b>           |                                                                                                                                                                                                                                                                                                                                                                                                                                                                                                                                                                                                                                                                                                                                                                                                                                                                                                                                                                                                                                                                                                                                                                                                                                                                                                                                                                                                                                                                                                                                                                                                                                                                                                                                                                                                                                                                                                                                                                                                                                                                                                                                                                                   |                     |
| <b>Corresponding Author's Secondary Institution:</b> |                                                                                                                                                                                                                                                                                                                                                                                                                                                                                                                                                                                                                                                                                                                                                                                                                                                                                                                                                                                                                                                                                                                                                                                                                                                                                                                                                                                                                                                                                                                                                                                                                                                                                                                                                                                                                                                                                                                                                                                                                                                                                                                                                                                   |                     |
| <b>First Author:</b>                                 | Sree Rohit Rohit Kolora                                                                                                                                                                                                                                                                                                                                                                                                                                                                                                                                                                                                                                                                                                                                                                                                                                                                                                                                                                                                                                                                                                                                                                                                                                                                                                                                                                                                                                                                                                                                                                                                                                                                                                                                                                                                                                                                                                                                                                                                                                                                                                                                                           |                     |
| <b>First Author Secondary Information:</b>           |                                                                                                                                                                                                                                                                                                                                                                                                                                                                                                                                                                                                                                                                                                                                                                                                                                                                                                                                                                                                                                                                                                                                                                                                                                                                                                                                                                                                                                                                                                                                                                                                                                                                                                                                                                                                                                                                                                                                                                                                                                                                                                                                                                                   |                     |
| <b>Order of Authors:</b>                             | Sree Rohit Rohit Kolora                                                                                                                                                                                                                                                                                                                                                                                                                                                                                                                                                                                                                                                                                                                                                                                                                                                                                                                                                                                                                                                                                                                                                                                                                                                                                                                                                                                                                                                                                                                                                                                                                                                                                                                                                                                                                                                                                                                                                                                                                                                                                                                                                           |                     |
|                                                      | Anne Weigert                                                                                                                                                                                                                                                                                                                                                                                                                                                                                                                                                                                                                                                                                                                                                                                                                                                                                                                                                                                                                                                                                                                                                                                                                                                                                                                                                                                                                                                                                                                                                                                                                                                                                                                                                                                                                                                                                                                                                                                                                                                                                                                                                                      |                     |
|                                                      | Amin Saffari                                                                                                                                                                                                                                                                                                                                                                                                                                                                                                                                                                                                                                                                                                                                                                                                                                                                                                                                                                                                                                                                                                                                                                                                                                                                                                                                                                                                                                                                                                                                                                                                                                                                                                                                                                                                                                                                                                                                                                                                                                                                                                                                                                      |                     |
|                                                      | Stephanie Kehr                                                                                                                                                                                                                                                                                                                                                                                                                                                                                                                                                                                                                                                                                                                                                                                                                                                                                                                                                                                                                                                                                                                                                                                                                                                                                                                                                                                                                                                                                                                                                                                                                                                                                                                                                                                                                                                                                                                                                                                                                                                                                                                                                                    |                     |
|                                                      | Maria Beatriz Walter Costa                                                                                                                                                                                                                                                                                                                                                                                                                                                                                                                                                                                                                                                                                                                                                                                                                                                                                                                                                                                                                                                                                                                                                                                                                                                                                                                                                                                                                                                                                                                                                                                                                                                                                                                                                                                                                                                                                                                                                                                                                                                                                                                                                        |                     |
|                                                      | Cathrin Spröer                                                                                                                                                                                                                                                                                                                                                                                                                                                                                                                                                                                                                                                                                                                                                                                                                                                                                                                                                                                                                                                                                                                                                                                                                                                                                                                                                                                                                                                                                                                                                                                                                                                                                                                                                                                                                                                                                                                                                                                                                                                                                                                                                                    |                     |
|                                                      | Henrike Indrischek                                                                                                                                                                                                                                                                                                                                                                                                                                                                                                                                                                                                                                                                                                                                                                                                                                                                                                                                                                                                                                                                                                                                                                                                                                                                                                                                                                                                                                                                                                                                                                                                                                                                                                                                                                                                                                                                                                                                                                                                                                                                                                                                                                |                     |

|                                                |                                                                                                                                                                                                                                                                                                                                                                                                                                                                                                                                                                                                                                                                                                                                                                                                                                                                                                                                                                                                                                                                                                                                                                                                                                                                                                                                                                                                                                                                                                                                                                                                                                                                                                                                                                                                                                                                                                                                                                                                                                                                                                                                                                                                                                                                                                                                                                                                                                                                                                                                                                                                                                                                                                                                                                                                                                                                                                                                                                       |
|------------------------------------------------|-----------------------------------------------------------------------------------------------------------------------------------------------------------------------------------------------------------------------------------------------------------------------------------------------------------------------------------------------------------------------------------------------------------------------------------------------------------------------------------------------------------------------------------------------------------------------------------------------------------------------------------------------------------------------------------------------------------------------------------------------------------------------------------------------------------------------------------------------------------------------------------------------------------------------------------------------------------------------------------------------------------------------------------------------------------------------------------------------------------------------------------------------------------------------------------------------------------------------------------------------------------------------------------------------------------------------------------------------------------------------------------------------------------------------------------------------------------------------------------------------------------------------------------------------------------------------------------------------------------------------------------------------------------------------------------------------------------------------------------------------------------------------------------------------------------------------------------------------------------------------------------------------------------------------------------------------------------------------------------------------------------------------------------------------------------------------------------------------------------------------------------------------------------------------------------------------------------------------------------------------------------------------------------------------------------------------------------------------------------------------------------------------------------------------------------------------------------------------------------------------------------------------------------------------------------------------------------------------------------------------------------------------------------------------------------------------------------------------------------------------------------------------------------------------------------------------------------------------------------------------------------------------------------------------------------------------------------------------|
|                                                | Gero Doose                                                                                                                                                                                                                                                                                                                                                                                                                                                                                                                                                                                                                                                                                                                                                                                                                                                                                                                                                                                                                                                                                                                                                                                                                                                                                                                                                                                                                                                                                                                                                                                                                                                                                                                                                                                                                                                                                                                                                                                                                                                                                                                                                                                                                                                                                                                                                                                                                                                                                                                                                                                                                                                                                                                                                                                                                                                                                                                                                            |
|                                                | Manjusha Chintalapati                                                                                                                                                                                                                                                                                                                                                                                                                                                                                                                                                                                                                                                                                                                                                                                                                                                                                                                                                                                                                                                                                                                                                                                                                                                                                                                                                                                                                                                                                                                                                                                                                                                                                                                                                                                                                                                                                                                                                                                                                                                                                                                                                                                                                                                                                                                                                                                                                                                                                                                                                                                                                                                                                                                                                                                                                                                                                                                                                 |
|                                                | Konrad Lohse                                                                                                                                                                                                                                                                                                                                                                                                                                                                                                                                                                                                                                                                                                                                                                                                                                                                                                                                                                                                                                                                                                                                                                                                                                                                                                                                                                                                                                                                                                                                                                                                                                                                                                                                                                                                                                                                                                                                                                                                                                                                                                                                                                                                                                                                                                                                                                                                                                                                                                                                                                                                                                                                                                                                                                                                                                                                                                                                                          |
|                                                | Jörg Overmann                                                                                                                                                                                                                                                                                                                                                                                                                                                                                                                                                                                                                                                                                                                                                                                                                                                                                                                                                                                                                                                                                                                                                                                                                                                                                                                                                                                                                                                                                                                                                                                                                                                                                                                                                                                                                                                                                                                                                                                                                                                                                                                                                                                                                                                                                                                                                                                                                                                                                                                                                                                                                                                                                                                                                                                                                                                                                                                                                         |
|                                                | Boyke Bunk                                                                                                                                                                                                                                                                                                                                                                                                                                                                                                                                                                                                                                                                                                                                                                                                                                                                                                                                                                                                                                                                                                                                                                                                                                                                                                                                                                                                                                                                                                                                                                                                                                                                                                                                                                                                                                                                                                                                                                                                                                                                                                                                                                                                                                                                                                                                                                                                                                                                                                                                                                                                                                                                                                                                                                                                                                                                                                                                                            |
|                                                | Christoph Bleidorn                                                                                                                                                                                                                                                                                                                                                                                                                                                                                                                                                                                                                                                                                                                                                                                                                                                                                                                                                                                                                                                                                                                                                                                                                                                                                                                                                                                                                                                                                                                                                                                                                                                                                                                                                                                                                                                                                                                                                                                                                                                                                                                                                                                                                                                                                                                                                                                                                                                                                                                                                                                                                                                                                                                                                                                                                                                                                                                                                    |
|                                                | Klaus Henle                                                                                                                                                                                                                                                                                                                                                                                                                                                                                                                                                                                                                                                                                                                                                                                                                                                                                                                                                                                                                                                                                                                                                                                                                                                                                                                                                                                                                                                                                                                                                                                                                                                                                                                                                                                                                                                                                                                                                                                                                                                                                                                                                                                                                                                                                                                                                                                                                                                                                                                                                                                                                                                                                                                                                                                                                                                                                                                                                           |
|                                                | Katja Nowick                                                                                                                                                                                                                                                                                                                                                                                                                                                                                                                                                                                                                                                                                                                                                                                                                                                                                                                                                                                                                                                                                                                                                                                                                                                                                                                                                                                                                                                                                                                                                                                                                                                                                                                                                                                                                                                                                                                                                                                                                                                                                                                                                                                                                                                                                                                                                                                                                                                                                                                                                                                                                                                                                                                                                                                                                                                                                                                                                          |
|                                                | Rui Faria                                                                                                                                                                                                                                                                                                                                                                                                                                                                                                                                                                                                                                                                                                                                                                                                                                                                                                                                                                                                                                                                                                                                                                                                                                                                                                                                                                                                                                                                                                                                                                                                                                                                                                                                                                                                                                                                                                                                                                                                                                                                                                                                                                                                                                                                                                                                                                                                                                                                                                                                                                                                                                                                                                                                                                                                                                                                                                                                                             |
|                                                | Peter F Stadler                                                                                                                                                                                                                                                                                                                                                                                                                                                                                                                                                                                                                                                                                                                                                                                                                                                                                                                                                                                                                                                                                                                                                                                                                                                                                                                                                                                                                                                                                                                                                                                                                                                                                                                                                                                                                                                                                                                                                                                                                                                                                                                                                                                                                                                                                                                                                                                                                                                                                                                                                                                                                                                                                                                                                                                                                                                                                                                                                       |
|                                                | Martin Schlegel                                                                                                                                                                                                                                                                                                                                                                                                                                                                                                                                                                                                                                                                                                                                                                                                                                                                                                                                                                                                                                                                                                                                                                                                                                                                                                                                                                                                                                                                                                                                                                                                                                                                                                                                                                                                                                                                                                                                                                                                                                                                                                                                                                                                                                                                                                                                                                                                                                                                                                                                                                                                                                                                                                                                                                                                                                                                                                                                                       |
| <b>Order of Authors Secondary Information:</b> |                                                                                                                                                                                                                                                                                                                                                                                                                                                                                                                                                                                                                                                                                                                                                                                                                                                                                                                                                                                                                                                                                                                                                                                                                                                                                                                                                                                                                                                                                                                                                                                                                                                                                                                                                                                                                                                                                                                                                                                                                                                                                                                                                                                                                                                                                                                                                                                                                                                                                                                                                                                                                                                                                                                                                                                                                                                                                                                                                                       |
| <b>Response to Reviewers:</b>                  | <p>Dear Dr. Scott Edmunds, Executive Editor of GigaScience:</p> <p>We would like to resubmit the revised manuscript entitled “Divergent evolution in the genomes of closely-related lacertids, <i>Lacerta viridis</i> and <i>L. bilineata</i> and implications for speciation”, previously submitted to GigaScience (GIGA-D-18-00173). We believe we have addressed all the reviewers’ helpful and constructive points, performed the necessary modifications and corrections with additional analysis. We would like to thank the reviewers for their time invested in reviewing our manuscript. Below, we present detailed responses to all comments, hoping that the current version meets the quality standards for being published in GigaScience.</p> <p>Sincerely,<br/>Sree Rohit Raj Kolora, on behalf of all authors</p> <p>Reviewer suggestions:</p> <p>Reviewer #1: Kolora and colleagues assemble the genomes of two sister species of green lizards to determine the basis of the genomic incompatibility between them. The study is quite explorative and descriptive, testing a whole bunch of stuff that turned out to be of interest in other taxa. The MS is generally well-written but there are some textual issues listed below.</p> <p>In general I find this study lacking a clear focus. In lines 116-120 a clear aim of this study is missing. You do a whole bunch of analyses and the MS is quite long-winded, but the common thread is missing or at least obscured. The elements are all there though, so I would like to ask you to make this a bit tighter and to the point. The green lizard hybrid zone is a great system so leverage that in your advantage.</p> <p>To address this we have rewritten parts of our introduction and discussion to clarify the main aim of the study which is: “identifying candidates and traits involved in divergent evolution of sister species” – namely UV-reflective differences influencing sexual selection, structural divergence in ncRNAs, association of inversions with PSGs, adaptive differences in transcription factors and genes related to brain development and behavior.</p> <p>The green lizard hybrid zone though interesting is hard to define due to the presence of multiple contact zones (Marzahn et. al. 2016). The demography of the hybrid zones is still not completely clear and this can only be resolved by sequencing the individuals from this region, for which our study provides the reference genomes to compare.</p> <p>Lines 55-61: I find this section confusing. Your point ii simply seems a restatement of what you want to argue. From point iii it does not follow why this should prevent species merger, because could this not actually drive interspecific introgression? This part has been corrected to remove portions that have not been described in the manuscript. The basic notion was to explain how inversions can contribute to</p> |

divergence between species despite ongoing gene flow or admixture. We tried to clarify the third point to avoid confusion.

Lines 71-76: For example, this is all very general and what is lacking is a clear reasoning why you are doing this analysis for the green lizards in particular. Our apologies for the confusion, this and the previous paragraph are intended to describe the current methods that we can employ to get information from the genomes of two closely related species about their divergence process, including their demographic history (in this particular paragraph). The system of green lizards is introduced in the following paragraph and their features of interest are described.

Line 338-344: Your argument here is not clear (to me). The  $N_e$  of Lbil is larger than Lvir because of more structure in Lbil but then you appear to be talking about a subpopulation of Lvir (eastern clade) so that suggests Lvir has plenty of substructure? This objection is correct and we performed an extensive analysis with more blocks data. This supports Lvir to have a higher  $N_e$  compared to Lbil with gene flow from Lbil to Lvir. This part has been rewritten with this additional analysis which includes the model for admixture.

Textual:

Line 46: The "non-essential" is a bit misleading of course, it depends on what perspective (something similar in abstract too). This has been removed.

Line 105: The "Furthermore" does not follow, it is a disadvantage of the mtDNA/nuDNA sequence study over allozymes that you highlight here. Your aim is to show that there are still uncertainties. This has been modified accordingly.

Line 109 and 111: Two times "This" is confusing. I don't see how it follows here that genomic re-arrangements are likely. "This" has been removed and the sentences rewritten, genomic rearrangements were hypothesized earlier between lacertids due to changes in chromosome morphology (citation added).

Line 333-334: "which are 95% identical", these words are unnecessary and make for a confusing sentence (identical to what exactly?). The sentence has been corrected.

Line 362: word "is" missing  
This has been corrected.

Line 398: word "with" redundant  
This has been corrected.

Reviewer #2: In the manuscript "Divergent evolution in the genomes of closely-related lacertids, *Lacerta viridis* and *L. bilineata* and implications for speciation" Kolora and colleagues present de novo genome assemblies of two species of green lizards based on a combination of Illumina short reads and PacBio sequencing. This resulted in a pair of impressively contiguous and complete genomes which they annotate using a set of tissue-specific transcriptome sequencing. The authors go on to perform an exhaustive array of analyses to characterize structural, copy number, and sequence divergence between these two species, the ancestral lineage of these two species, and a selection of additional existing genomes. While I feel this work has the potential to be a great contribution, there are number of issues (detailed below) that I feel must first be addressed.

Line 18: "...identify intrinsic and extrinsic factors involved in reproductive isolation" While the divergence between these species is well characterized in this manuscript, the specific factors involved in reproductive isolation are not identified. The authors do suggest a number of viable hypotheses regarding the basis of isolation. Indeed, the authors discuss in their introduction how speciation genes have largely been identified in model organisms due to the tractability of genetic crosses. These speciation genes

are specifically those show to play a direct role in reproductive isolation and not all genes that have experienced divergence or selection between lineages. I would consider revising this sentence and elsewhere to reflect this distinction.  
The factors for reproductive isolation have been mentioned in lines 303, 370, 383, 397-398. Additional corrections were made in parts of discussion and in the conclusion to include these factors.

Line 25: "...have been critical for reduced reproductive success". Same comment as above. Considering adding "may" to the start of this phrase.  
This has been corrected.

Line 49: "diversification" Perhaps the authors mean divergence or speciation?  
"diversification" replaced by "divergence eventually leading to speciation"

Line 52: "allowing to test" This sentence is missing a subject.  
Subject "us" has been added.

Line 53: A comma is needed after "Specifically".  
This has been corrected.

Line 65: First mention of KZNFs here without clear explanation of why they are singled out.  
KZNFs have been removed from the sentence. The rationale was that KZNFs are known to be involved in species differences between primates, this has been referred to in the discussion.

Line 98: "Corresponding to lineage B" please add detail here on the citation of lineage B and V.  
The detailed citations have been added.

Results: Please report the total size of each assembly in the text.  
This information has been added.

Line 129: The Anolis carolinensis genome was not generated via high-coverage Illumina sequencing.  
This has been corrected.

Line 129 (and Table S1): Also, while it is accurate that contig N50 in the current study exceed contig N50 for Anolis carolinensis, the scaffold N50 for the carolinensis genome is multiple orders of magnitude more contiguous (151 Mb - note this has been often misreported at 4Mb in the literature, see Tollis et al 2018 for correct scaffold N50). I suggest making this point clear.  
This has been corrected in the supplement. An additional sentence on higher N50 of anolis genome was added.

Line 147: The reported karyotype is that of Anolis carolinensis, but is not shared by all anoles. Perhaps rephrase?  
A. carolinensis has been specifically mentioned.

Line 151: Please provide a citation for a divergence time of 150Mya or more.  
Citation has been provided.

Line 186: This estimate of  $F_{st}$  should be considered a maximum as using heterozygosity from single individuals will have the effect of maximizing the estimate of  $D_{xy}$  and minimizes estimates of  $\pi$ . I suggest making it clear that actual  $F_{st}$  is likely lower.  
The heterozygosity of an individual is an unbiased estimate of pairwise  $\pi$  (given a panmictic population) and  $d_{xy}$  is similarly sample size independent. Hence we would like to kindly inform that our estimate of  $F_{st}$  is indeed unbiased and not some upper lower bound.

Line 187, 203, 489: While I commend the authors for including their Mathematica code as a supplement, I think addition detail on this method and results should be provided. What are the likelihoods of each model? How much better than other models was

|                                                                               |                                                                                                                                                                                                                                                                                                                                                                                                                                                                                                                                                                                                                                                                                                                                                                                                                                                                                                                                                                                                                                                                                                                                                                                                                                                                                                                                                                                                                                                                                                                                                                                                                                                                                                                                                                                                                                                                                                                                                                                                                                                                                                                                                                                                                                                                                                                                                                                                                                                                                                                                                                                                                                                                                                                                                                                                                                                                                                                                                                                                                                                                                                                                                                                                                                                                                                                                                                                                                                                                                                       |
|-------------------------------------------------------------------------------|-------------------------------------------------------------------------------------------------------------------------------------------------------------------------------------------------------------------------------------------------------------------------------------------------------------------------------------------------------------------------------------------------------------------------------------------------------------------------------------------------------------------------------------------------------------------------------------------------------------------------------------------------------------------------------------------------------------------------------------------------------------------------------------------------------------------------------------------------------------------------------------------------------------------------------------------------------------------------------------------------------------------------------------------------------------------------------------------------------------------------------------------------------------------------------------------------------------------------------------------------------------------------------------------------------------------------------------------------------------------------------------------------------------------------------------------------------------------------------------------------------------------------------------------------------------------------------------------------------------------------------------------------------------------------------------------------------------------------------------------------------------------------------------------------------------------------------------------------------------------------------------------------------------------------------------------------------------------------------------------------------------------------------------------------------------------------------------------------------------------------------------------------------------------------------------------------------------------------------------------------------------------------------------------------------------------------------------------------------------------------------------------------------------------------------------------------------------------------------------------------------------------------------------------------------------------------------------------------------------------------------------------------------------------------------------------------------------------------------------------------------------------------------------------------------------------------------------------------------------------------------------------------------------------------------------------------------------------------------------------------------------------------------------------------------------------------------------------------------------------------------------------------------------------------------------------------------------------------------------------------------------------------------------------------------------------------------------------------------------------------------------------------------------------------------------------------------------------------------------------------------|
|                                                                               | <p>model M4.1? How were more complex models compared to models with fewer parameters?<br/>This was previously present in the supplement. We have moved it to the main text including additional analysis with an admixture model.</p> <p>Line 254: The maintenance of opsin paralogs over long periods of evolutionary times certainly suggest they are functionally important, but the phrase "similar diurnal adaptations" suggests parallel evolution, where the more likely scenario (I think) is simply conservation.<br/>We completely agree and did not intend to imply parallel evolution. We have corrected this sentence to imply conservation.</p> <p>Line 305: "Neutrally evolving genes" Please be specific about how genes are classified as "neutrally evolving". Does this mean they are unconstrained or that there is no evidence of positive selection in branch-site tests?<br/>We have corrected this to imply genes with no signs of positive selection.</p> <p>Line 311: "indels over-showing" I'm not clear what is meant by "over-showing". Please consider rephrasing?<br/>This has been corrected with "obscuring".</p> <p>Line 316: How were multiple Boschloo exact-tests tests corrected?<br/>FDRs were calculated and the values have been added.</p> <p>Line 337: "Therefore, our results support the separate species status of <i>L. viridis</i> and <i>L. bilineata</i>." Which species concept is used to underpin this statement?<br/>We rewrote this statement more carefully, since we do not want to indulge in any discussion of the numerous and controversial species concepts here.</p> <p>Line 338: "Confirmed" The demographic modeling supported unidirectional gene flow, but confirmed seems too strong of a sentiment here.<br/>Agreed, this has been replaced with "supports".</p> <p>Line 340: While population subdivision can increase heterozygosity and estimates of effective population size via the Wahlund effect, the heterozygosity of a single individual (a member of just a single subpopulation) would not reflect this increase heterozygosity. I would suggest the authors consider other possible explanations. For example, their hypothesis of unidirectional gene flow into <i>L. bilineata</i> could, by itself, explain elevated heterozygosity if the sequenced individual contains <i>L. viridis</i> alleles due to introgression.<br/>We have re-analysed the demographic patterns with additional data and more extensive models including simple divergence, isolation with migration and admixture. In this improved analyses, the best model supports gene flow predominantly from <i>L. bilineata</i> to <i>L. viridis</i>. Since gene flow occurs in this direction, <i>L. viridis</i> could have a higher effective population size.</p> <p>Line 508: "on overage" Typo?<br/>This has been corrected.</p> <p>Line 509: "... this data" should be "... these data"<br/>This has been corrected.</p> <p>Line 640: Please cite any relevant animal use and care authorizations.<br/>The capture permits were added in the acknowledgements, and the animal care for experimentation has been specified in the methods. The permits can be provided to the editor upon request. We do not have a specific ethics committee at our institution, hence we followed the guidelines provided by the Herpetological Animal Care and Use Committee (HACC) of the American Society of Ichthyologists and Herpetologists.</p> |
| <b>Additional Information:</b>                                                |                                                                                                                                                                                                                                                                                                                                                                                                                                                                                                                                                                                                                                                                                                                                                                                                                                                                                                                                                                                                                                                                                                                                                                                                                                                                                                                                                                                                                                                                                                                                                                                                                                                                                                                                                                                                                                                                                                                                                                                                                                                                                                                                                                                                                                                                                                                                                                                                                                                                                                                                                                                                                                                                                                                                                                                                                                                                                                                                                                                                                                                                                                                                                                                                                                                                                                                                                                                                                                                                                                       |
| <b>Question</b>                                                               | <b>Response</b>                                                                                                                                                                                                                                                                                                                                                                                                                                                                                                                                                                                                                                                                                                                                                                                                                                                                                                                                                                                                                                                                                                                                                                                                                                                                                                                                                                                                                                                                                                                                                                                                                                                                                                                                                                                                                                                                                                                                                                                                                                                                                                                                                                                                                                                                                                                                                                                                                                                                                                                                                                                                                                                                                                                                                                                                                                                                                                                                                                                                                                                                                                                                                                                                                                                                                                                                                                                                                                                                                       |
| Are you submitting this manuscript to a special series or article collection? | No                                                                                                                                                                                                                                                                                                                                                                                                                                                                                                                                                                                                                                                                                                                                                                                                                                                                                                                                                                                                                                                                                                                                                                                                                                                                                                                                                                                                                                                                                                                                                                                                                                                                                                                                                                                                                                                                                                                                                                                                                                                                                                                                                                                                                                                                                                                                                                                                                                                                                                                                                                                                                                                                                                                                                                                                                                                                                                                                                                                                                                                                                                                                                                                                                                                                                                                                                                                                                                                                                                    |

|                                                                                                                                                                                                                                                                                                                                                                                                                                                                                                                                                         |            |
|---------------------------------------------------------------------------------------------------------------------------------------------------------------------------------------------------------------------------------------------------------------------------------------------------------------------------------------------------------------------------------------------------------------------------------------------------------------------------------------------------------------------------------------------------------|------------|
| <p><b>Experimental design and statistics</b></p> <p>Full details of the experimental design and statistical methods used should be given in the Methods section, as detailed in our <a href="#">Minimum Standards Reporting Checklist</a>. Information essential to interpreting the data presented should be made available in the figure legends.</p> <p>Have you included all the information requested in your manuscript?</p>                                                                                                                      | <p>Yes</p> |
| <p><b>Resources</b></p> <p>A description of all resources used, including antibodies, cell lines, animals and software tools, with enough information to allow them to be uniquely identified, should be included in the Methods section. Authors are strongly encouraged to cite <a href="#">Research Resource Identifiers</a> (RRIDs) for antibodies, model organisms and tools, where possible.</p> <p>Have you included the information requested as detailed in our <a href="#">Minimum Standards Reporting Checklist</a>?</p>                     | <p>Yes</p> |
| <p><b>Availability of data and materials</b></p> <p>All datasets and code on which the conclusions of the paper rely must be either included in your submission or deposited in <a href="#">publicly available repositories</a> (where available and ethically appropriate), referencing such data using a unique identifier in the references and in the “Availability of Data and Materials” section of your manuscript.</p> <p>Have you have met the above requirement as detailed in our <a href="#">Minimum Standards Reporting Checklist</a>?</p> | <p>Yes</p> |



25 UV-response possibly driven by sexual selection, whose contribution to reproductive isolation  
26 between these lacertid species need to be further evaluated.

27 **Conclusion:** The combination of short and long sequence reads resulted in one of the most  
28 complete lizard genome assemblies. The characterization of a diverse array of genomic features  
29 provided valuable insights into the demographic history of divergence among European green  
30 lizards, as well as key species differences, some of which are candidates that could have played  
31 a role in speciation. In addition, our study generated valuable genomic resources that can be  
32 used to address conservation related issue in lacertids.

## 34 **Introduction**

35 Understanding what species are and the processes driving their emergence have been two  
36 central issues in biology [1]. During the last century, genes involved in reproductive isolation  
37 were mainly identified in model organisms, such as *Drosophila* [2]. These studies aiming at the  
38 so-called “speciation genes” revealed at least three general patterns: i) genes involved in post-  
39 zygotic incompatibilities show signatures of accelerated evolution [2]; ii) incompatibilities  
40 often involve a disproportionate number of genes located on sex chromosomes [3, 4] and iii)  
41 mis-expression is often observed in hybrids, suggesting that gene regulation is an important  
42 component of speciation [5-7]. However, the identification of incompatibilities using laborious  
43 lab crosses was only possible for model organisms, and thus the identification of loci involved  
44 in reproductive isolation [8] in natural populations remained largely unknown.

45 The advent of high throughput sequencing together with the development of novel approaches  
46 for whole genome analyses opened new research avenues to study the origin of species,  
47 including non-model organisms [9]. It has been shown that genes involved in adaptation and  
48 speciation are often found in regions of low recombination, such as genomic rearrangements,



49 suggesting that they play an important role in species diversification [10]. Several *in-silico* tools  
50 have been developed to detect structural variation with high precision using genomic data [11-  
51 13], thus enabling us to test evolutionary hypotheses such as the role of genomic rearrangements  
52 in speciation over a wider taxonomic range [14].

53 The assessment of divergence in regulatory elements and transcription factors between species  
54 further adds to a more complete understanding of the link between genotypes and phenotypes.  
55 In this respect, transcriptome sequencing offers an unprecedented resolution to investigate the  
56 general importance of divergence in gene regulation in speciation. In particular, zinc-finger  
57 genes, especially *Krüppel*-type zinc fingers (KZNFs), a family of transcription factors were  
58 pinpointed as strong candidates to play a role in the speciation of other vertebrates [6]. In  
59 addition, various epigenetic mechanisms between species mediated by non-coding RNA  
60 (ncRNA) can also contribute to speciation [15-18].

61 Nevertheless, our understanding of how speciation unfolds, as well as the mechanisms involved  
62 will remain limited without the knowledge of the demographic history between diverging taxa  
63 [8]. Model-based methods are now available to infer the demographic history of recently  
64 diverged taxa based on genome data from a few individuals of each species [19]. Thus, patterns  
65 of gene flow and population size changes during divergence can now be inferred without  
66 extensive sampling [20].

67 In summary, the identification of differences in genomic features between closely related  
68 species and their demographic history can now be assessed in a cost-effective manner. The  
69 resulting information is likely to provide insights about the main candidates playing a role in  
70 diversification, upon which more specific hypotheses concerning the mechanisms of divergence  
71 can be tested.

72 Lizards provide an excellent model for studying speciation due to the existing knowledge on  
73 their long-term demographics and adaptive morphologies, in addition to the ease of sample

1  
2  
3  
4  
5  
6  
7  
8  
9  
10  
11  
12  
13  
14  
15  
16  
17  
18  
19  
20  
21  
22  
23  
24  
25  
26  
27  
28  
29  
30  
31  
32  
33  
34  
35  
36  
74 collection and experimental manipulations [21]. Lizards of the genus *Anolis*, in particular, have  
75 been studied in detail, as their distribution on islands coupled with repeated adaptive radiations  
76 offer a perfect framework for evolutionary ecology studies [22]. Not surprisingly, the first  
77 sequenced squamate genome was an anole lizard [23]. Comparative genomic analysis of *Anolis*  
78 *carolinensis* (anole lizard) with the genomes of birds and mammals was pivotal in identifying  
79 accelerated evolution of egg proteins associated with amniote evolution [23]. Further sauropsid  
80 genomes (birds and reptiles) were sequenced in recent years, now covering a broader taxonomic  
81 range of Squamata, Archosauria and Chelonia [24-31]. For instance, the study of *Gekko*  
82 *japonicus* (gecko lizard) contributed to the understanding of evolution and adaptation of tail  
83 regeneration, clinging, nocturnal vision and diversification of the olfactory system [26]. In  
84 addition, the genomes of *Pogona vitticeps* (bearded dragon lizard) and *Shinisaurus*  
85 *crocodilurus* (Chinese crocodile lizard) have recently been characterized [24, 27]. However,  
86 comparative genome analyses of closely-related lizard species pairs have been limited to anoles,  
87 where adaptive evolution of genes related to brain development and behaviour was recently  
88 reported [32].

37  
38  
39  
40  
41  
42  
43  
44  
45  
46  
47  
48  
49  
50  
51  
52  
53  
54  
55  
56  
57  
58  
59  
60  
61  
62  
63  
64  
65  
89 The family Lacertidae (Sauropsida, Squamata) has been well covered in-terms of  
90 phylogeographic studies, providing important information about the likely timing and  
91 geographic context of speciation [21]. Within this family, the *Lacerta viridis* complex shows  
92 an intricate evolutionary history with secondary contact zones [33, 34]. Here, we focus on the  
93 divergence between the western clade formally described as *L. bilineata* and the eastern clade  
94 of *L. viridis* (corresponding to lineage B and lineage V respectively of Marzahn *et al.*) that  
95 currently occupy disjoint regions in Europe [34].

96 Adult individuals from the two taxa are very similar: throat colouration of hatchlings and early  
97 juveniles is the only described diagnostic trait so far [35]. Gene flow between these two species  
98 was previously hypothesized in studies of allozyme variation [36, 37]. However, recent

99 analyses based on mtDNA and one nuclear marker (fibint7) have cast doubt on the taxonomic  
100 classification of the individuals analyzed in those studies and did not provide conclusive  
101 evidence either for or against gene flow between *L. viridis* and *L. bilineata* [34].

102 Hybrids between different main lineages within the *L. viridis* complex (northern Italy and  
103 Hungary) exhibit reduced fitness under laboratory conditions [38]. This suggests that at least  
104 partial reproductive isolation between *L. viridis* and *L. bilineata* can exist in the wild due to  
105 genomic Bateson-Dobzhansky-Muller incompatibilities (BDMIs). Previous models have  
106 suggested that after a secondary contact, BDMIs can be maintained and further accumulate  
107 within genome rearrangements [39, 40], thus avoiding species fusion [41]. High karyotypic  
108 variability has been observed in reptiles [42], also within the *L. viridis* complex [43], raising  
109 the prospect that genomic rearrangements could also be involved in their diversification [44].  
110 Finally, lizard-specific KZNF genes have recently been predicted [45], making our focal pair  
111 of taxa an excellent case study of evolution in this class of genes and their role in speciation via  
112 changes in gene regulatory networks. Overall, the *L. viridis* complex comprises a very  
113 interesting system where different genomic components can be studied to elucidate the  
114 demographic history and possible processes involved in speciation.

115 Here, we combine short Illumina and long PacBio read sequencing approaches to construct high  
116 quality *de novo* genomes for both *L. bilineata* and *L. viridis*, with annotation support from  
117 transcriptomic data. We investigated the demographic history of divergence between the two  
118 lacertid taxa and performed a broad comparison of key genomic features providing important  
119 insights about their divergence that can be tested in future studies aiming to identify the  
120 mechanisms ultimately leading to speciation between this closely related species pair.

121

122

## 123 Results

### 124 The genomes of *L. viridis* and *L. bilineata*

125 We employed a hybrid strategy of combining Illumina and PacBio sequencing data to produce  
126 separate genome assemblies for the two lacertid species. Genome sequencing coverages of 34x  
127 Illumina and 14x PacBio for *L. viridis*; and 37x Illumina and 11x PacBio for *L. bilineata* aided  
128 in the construction of high quality genome assemblies (supplement SI-1; Figure S2, S3). The  
129 genome assembly sizes were 1.44 Gbp and 1.42 Gbp for *L. viridis* and *L. bilineata* respectively.  
130 The assembled lacertid genomes achieved better contiguity than the high coverage illumina-  
131 only contigs of *G. japonicus* but lower than the chromosome level assembly of *A. carolinensis*  
132 (368 kbp and 663 kbp for *L. bilineata* and *L. viridis* respectively versus 150 Mbp in *A.*  
133 *carolinensis*) (Table S1). While the BUSCO (Benchmarking Universal Single-Copy Orthologs)  
134 completeness in terms of single-copy ortholog (SCO) genes with vertebrate core gene set were  
135 96% and 94% respectively, higher than in the available lizard genomes. Since the genome of *L.*  
136 *viridis* had better contiguity than *L. bilineata* (higher N50 and lesser number of contigs), *L.*  
137 *viridis* was used as the reference to predict genomic variants (structural variants (SVs) and  
138 single nucleotide polymorphisms (SNPs) between the two taxa.

139 *Lacerta viridis* genome consisted of higher number of large segmental duplications (>5 kbp)  
140 than *L. bilineata* (Figure S4). However, since no significant differences were observed in  
141 segmental duplications (>1 kbp) between the two lacertid genomes (F-test:  $p=0.35$  and  
142 Wilcoxon test:  $p=0.55$ ). Hence, the occurrence of lesser large segmental duplications in *L.*  
143 *bilineata* could be a result of higher fragmentation in its genome assembly. Synteny information  
144 was used to create unordered contig clusters (min. size of 1 Mbp covering one-third of the *L.*  
145 *viridis* genome) which roughly represent positioning on the same chromosome (Suppl. File S2).  
146 The median synonymous substitution rate (Ks) and non-synonymous substitution rate (Ka)

147 based on 7,030 SCOs between the two lacertid species were 0.021 and 0.016 respectively. A  
148 mutation rate of  $1 \times 10^{-9}$  substitutions per site per generation was estimated from the fourfold  
149 degenerate sites. This mutation rate observed in the ancestral lacertid lineage is similar to the  
150 ancestral bird lineage ( $1.15\text{-}1.23 \times 10^{-9}$  per site per generation) [46, 47].

151 The identical structures of the HOX-cluster between the lacertid species and *A. carolinensis*  
152 confirmed the high genomic assembly quality since the HOX-clusters are highly conserved  
153 (supplement SI-1). The number of chromosomes and the sex-determination system are different  
154 between *A. carolinensis* ( $2n=36$ , 12 macro- and 24 microchromosomes; XY) and lacertid  
155 lizards ( $2n=38$ ; 36 macro- and 2 microchromosomes; ZW) [43, 48]. However, genomic contigs  
156 of both lacertid species were syntenic without breaks or inter-chromosomal transpositions to  
157 the macro-chromosomes of *A. carolinensis* (Figure S2), even though the lacertids and anoles  
158 split more than 150 Mya [49]. The only exception to this was a *L. viridis* contig that splits into  
159 two macro-chromosomes of the *A. carolinensis* genome. This particular contig of *L. viridis* was  
160 syntenic to five separate contigs in *L. bilineata* assembly, confirming a higher fragmentation in  
161 genome assembly of the latter.

162 The assembled transcripts were crucial for gene annotations since the *ab initio* methods  
163 predicted more fragmented proteins and coding sequences (CDS) (38,000-55,000) when  
164 compared to the final gene models (22,100-22,500) (Table S2). A majority of the longest *de*  
165 *novo* assembled transcript isoforms were from the ovarian tissue followed by the brain. Since  
166 the sequencing throughput was highest for the liver tissue in both species, this finding was not  
167 likely the result of sequencing artifacts. We identified 22,156 genes in *L. viridis* and 22,491  
168 genes in *L. bilineata* supported by *de novo* assembled transcripts (supplement SI-2; Table S2).  
169 The higher number of genes in *L. bilineata* was due to the fragmentation of a few genes onto  
170 multiple contigs, which can be resolved in the future with scaffolding information. Compared  
171 to *A. carolinensis*, we observed an over-representation of genes involved in transfer RNA

172 (tRNA) aminoacylation (Panther release 20170413, fold-enrichment=2.13-2.25,  $p<0.03$ ) and  
173 tRNA metabolic process (Panther release 20170413, fold-enrichment=1.84-1.89,  $p<0.003$ ) in  
174 both lacertids, indicating an expansion of tRNA-processing genes before their split. Putative Z-  
175 chromosome linked contigs consisted of few non-coding elements (7-11 microRNAs, 1  
176 snoRNA, 2-3 snRNAs and 46-53 functional tRNAs) (supplement SI-3). The total length of the  
177 contigs assigned to the Z-chromosome in lacertids was larger (13.5-15.6 Mbp) than the Z-  
178 chromosomes of *P. vitticeps* (8 Mbp) but the number of identified genes were similar (205-221  
179 and 219, respectively) [50].

180 The number of predicted members of the different non-coding RNA classes was similar in *L.*  
181 *viridis* and *L. bilineata* (Table S3). Compared to other selected tetrapod species, there was an  
182 increase in the number of tRNAs (both functional- and pseudo-tRNAs) in the two lacertid  
183 species (Figure S5, S6). However, the numbers of tRNAs and pseudo-tRNAs are known to vary  
184 significantly in eukaryotes[51]. We found an over-representation of tRNA-processing genes  
185 supported by the expansion of tRNA elements in both lacertid species maintained through  
186 deletion-duplication events. microRNAs and snoRNAs in the lacertids exhibited losses  
187 compared to *A. carolinensis* (Figure S7, S8). Even though the numbers of snoRNAs and  
188 miRNAs were almost identical, the members in each ncRNA class diversified between the two  
189 sister species. Repeat content also differed between *L. viridis* and *L. bilineata*; with the latter  
190 exhibiting a gain of long-terminal repeat (LTR) elements (Table S5).

### 191 **Demographic history of divergence**

192 Across all sites, mean heterozygosity was slightly lower in *L. bilineata* than in *L. viridis*  
193 ( $\pi=0.0022$  and  $0.0029$  respectively). Absolute divergence per site between the two species as  
194 measured by  $D_{xy}$  was around 0.0123. A maximum pairwise  $F_{ST}$  of 0.688 was estimated between  
195 *L. viridis* and *L. bilineata*.

196 We inferred past divergence and gene flow between the two lacertid species using a likelihood  
197 method based on the site frequency spectrum of short sequence blocks i.e. blockwise site  
198 frequency spectrum (bSFS) [20, 52]. Since the likelihood calculation assumes no recombination  
199 within blocks and an infinite sites mutation model, we partitioned the genome into short (i.e.  
200 200 bases) blocks. Our dataset consisted of 5,654,020 blocks, of which 46,825 were filtered out  
201 (0.83%) since they contained both fixed differences and shared heterozygous sites thus  
202 violating the 4-gametes criterion under the assumption of no recombination within blocks.

203 In total, we have 2785 distinct mutational configurations i.e. the counts of the four entries of  
204 the folded joint site frequency spectrum (heterozygous sites unique to *L. viridis* and *L. bilineata*;  
205 heterozygous sites shared by both lacertids; fixed differences) in each block. 1965 of these  
206 blocks appeared more than once in the data (Supplementary Information 3).

207 We compared the AIC scores of thirteen different demographic scenarios (Table 1) given the  
208 pattern of bSFS between the two lacertid species (Supplementary file 3). However, this  
209 composite likelihood computation does not account for the correlation between adjacent blocks  
210 due to the physical linkage. To correct for this, we assumed that every 1000th block is  
211 effectively unlinked (Supplementary Information 3 Section LD), i.e. statistically independent,  
212 and corrected lnC:L scores by a factor of 1/200.

213 The best of the thirteen models (M3.3) supports isolation between the two lacertid species with  
214 unidirectional gene flow from *L. bilineata* to *L. viridis* and fits significantly better than simpler  
215 scenarios like divergence without gene flow (or just a single  $N_e$  parameter) or admixture (Table  
216 1). This model (M3.3) also suggests a smaller effective population size of *L. bilineata*  
217 ( $N_e=37890$ ) compared to its ancestor and *L. viridis* ( $N_e=95400$ ) (supplement SI-4; Table S6)  
218 and a migration rate of  $M=0.28$  migrants per generation from *L. bilineata* to *L. viridis* (Table  
219 S7).

220 Assuming a generation time of 3.5 years and a mutation rate of  $1.77 \times 10^{-8}$  (based on *cyt-b* gene)  
221 or  $1 \times 10^{-9}$  (based on the fourfold degenerate sites), our estimate of the split between *L. viridis*  
222 and *L. bilineata* corresponds to 1.15 Mya and 20.37 Mya respectively (Table S8).

### 223 **Detection of genomic rearrangements**

224 We detected 20,160 genomic rearrangements or structural variants (SVs) longer than 50bp  
225 between the two lacertids (Figure 2; Table S9) covering 39.4 Mbp of the *L. viridis* genome  
226 (2.7% of the genome). Compared to *L. bilineata*, 10.8 Mbp (0.07%) of the *L. viridis* genome  
227 was covered with large rearrangements affecting genes (covering the entire length of more than  
228 one gene). These regions were enriched for RNA-directed DNA polymerase activity (22.46  
229 fold-enrichment,  $p=5.11e-03$ ).

230 Indels are the most frequent genomic rearrangements mainly affecting introns, repeat elements  
231 and pseudo-tRNAs (supplement SI-5; Table S10). This is similar to the observations made with  
232 respect to SVs in humans and pigs [12, 53]. Most SVs overlapping exons cover entire exons  
233 and do not result in frame shift mutations, with the exception of EXD2 and HERC2, suggesting  
234 that their functions can be complemented by other genes (supplement SI-6).

### 235 **Structural selection of ncRNAs**

236 MicroRNAs (miRNA) were the most structurally conserved family of ncRNAs followed by  
237 small non-coding RNAs (snoRNA) (Figure S9). The four types of ncRNAs and the number of  
238 groups in each category are shown in Table S11 (supplement SI-7). High levels of diversity  
239 were observed in tRNAs, especially in pseudo-tRNA, which was further supported by high copy  
240 numbers of tRNAs with a low conservation among tRNA orthologs between the two lacertid  
241 species.



242 All ncRNAs with low structural diversity across orthologs were computationally tested for sites  
1  
2 243 with positive selection in either species. The positively selected snoRNA families belong to the  
3  
4 244 H/ACA box class, which can introduce changes in post-translational mechanisms and  
5  
6  
7 245 pseudouridylation between the two species [54]. SNORD61 (Small Nucleolar RNA, C/D Box  
8  
9 246 61) (Figure S10a) was inferred to have evolved under positive selection in *L. bilineata*. The  
10  
11 247 human ortholog of SNORD61 occurs in the intron of a RBMX (RNA binding motif protein, X-  
12  
13 248 linked gene), known to be involved in the dosage compensation and cohesion regulation of  
14  
15 249 sister chromatids [55]. Two microRNAs showed signs of positive selection in *L. viridis*:  
16  
17 250 MIR6516 (mir-6516-3p) (Figure S10b), associated with urea synthesis in pigs [56] and MIR27  
18  
19 251 (mir-27a and mir27-d) (Figure S10c), known to play a role in regeneration and osteoblast  
20  
21 252 differentiation in mice [57, 58]. However, mir-27d was absent in *L. bilineata*, so the structural  
22  
23 253 divergence in the mir-27 family between the two lacertid species can be due to the presence of  
24  
25 254 an additional MIR27 sequence in *L. viridis*. Two lincRNAs orthologs (LiNC66 and LiNC29)  
26  
27 255 overlapping with conserved regions across tetrapods were structurally divergent between the  
28  
29 256 two species, as indicated by high selection scores and stable secondary structures (Figure S10d-  
30  
31 257 e).

### 39 258 **Varying selection pressures in protein-coding genes**

40  
41  
42 259 The visual opsins are pivotal for adaptation to diurnal habitats in Squamata [24, 59]. For  
43  
44 260 instance, the nocturnal *G. japonicus* lost two of the five functional opsin paralogs compared to  
45  
46 261 diurnal anoles [26]. All five paralogs of visual opsins in *A. carolinensis* (22 transcripts from  
47  
48 262 ENSEMBL) were also present in *L. viridis* and *L. bilineata* (20 transcript sequences), indicating  
49  
50 263 conservation of genes for diurnal vision. We observed high conservation of SWS1 (opsins  
51  
52 264 related to UV vision), described to be involved in sexual selection [60, 61] and of the  
53  
54 265 pigmentation protein MC1R, previously associated with adaptive colouration in sand lizards  
55  
56  
57  
58  
59 266 [62] (supplement SI-8).

267 Genes involved in neuronal activity, behaviour, auditory perception and female reproductive  
1 system development were conserved in the lacertid ancestor i.e. before the split between the  
2 268 system development were conserved in the lacertid ancestor i.e. before the split between the  
3  
4 269 two species (compared to five other vertebrates in the background). Genes with different  
5  
6  
7 270 selective constraints between the two species (i.e. differently influenced by purifying selection  
8  
9  
10 271 after their split) were related to brain and neural development, embryo and cartilage  
11  
12 272 development along with behavioural responses (Table S12).

13  
14  
15 273 The test for positive selection in either of the two species was performed with the branch-site  
16  
17  
18 274 model of codeml (model M2) using a subset of other lizards as background branches. The  
19  
20 275 number of genes with positively selected sites (PSS) in different foreground branches (*L.*  
21  
22 276 *viridis*; *L. bilineata*; or the ancestor of *L. viridis* and *L. bilineata*) are shown in the Table S13  
23  
24  
25 277 (supplement SI-9). The predicted ontologies of genes with PSS in either of the two species  
26  
27 278 indicate variation in growth and developmental processes, behavioural responses (temperature  
28  
29  
30 279 and pH) and transcriptional regulation (Table S14). One of the genes with PSS in *L. bilineata*  
31  
32 280 (STAR7) is located on the Z-chromosome. We identified two transcription factor genes, UBIP1  
33  
34  
35 281 and RPA2 involved in gene silencing and reproductive functions [63, 64], with adaptive  
36  
37 282 differences between the two species. Three genes with PSS overlapped inverted regions;  
38  
39  
40 283 GPR155 gene with PSS in *L. bilineata*, both TDRD3 and UGPA with PSS in *L. viridis*. GPR155  
41  
42 284 is involved in cognitive functions and expressed in mice forebrain [65] while TDRD3 is directly  
43  
44  
45 285 associated with oocyte formation and X-linked developmental disorders [66, 67]. Three genes  
46  
47 286 NASP, PDL11 and RTKN were positively selected in the ancestor of the lacertid branch  
48  
49  
50 287 compared to background branches that include more distant classes such as mammals and birds  
51  
52 288 (supplement SI-9, Table S15).

53  
54  
55 289 The prostacyclin synthase (PTGIS) involved in regeneration through prostaglandin synthesis is  
56  
57  
58 290 positively selected in *A. carolinensis* and *G. japonicus* [26]. This gene evolved under positive  
59  
60  
61  
62  
63  
64  
65

1  
2 291 selection in the lacertid ancestor with *A. carolinensis* and *G. japonicus* as the background,  
3  
4  
5  
6 292 hinting at evolutionary changes in regenerative mechanisms among lacertid lizards.

### 7 8 9 293 **Diversification of UV-responsive genes**

10  
11 294 We identified three paralogs of the hyaluronidases (HYAL1, HYAL2 and HYAL4) in both the  
12  
13 295 lacertid genomes. Two genes (STIK1 and HYAL2) coding for proteins in the extra-cellular  
14  
15 296 matrix of the skin reacting to UV-B light (GO:0071493) [68] were positively selected in the  
16  
17 297 ancestral branch of the two species, while the HYAL1 paralog was positively selected in the *L.*  
18  
19 298 *viridis* branch (supplement SI-8). Arylsulfatase gene (ARSB) which is involved in the  
20  
21 299 chondroitin sulfate biosynthesis pathway along with HYAL was also positively selected in *L.*  
22  
23 300 *viridis*. Significant pathway enrichment of chondroitin sulfate biosynthesis was observed for  
24  
25 301 PSGs in *L. viridis* ( $p=2.6e-06$ ,  $q=1.3e-05$ ).

### 26 27 28 29 302 **Divergence of Kruppel-type zinc-finger (KZNF) proteins**

30  
31  
32  
33 303 To investigate the role of KRAB-ZNFs in reproductive isolation of the two lacertid species, we  
34  
35 304 compared the DNA-binding domains of KZNF orthologs. From the 53 KZNF orthologs, six  
36  
37 305 C2H2 zinc-finger proteins showed binding specific differences between the two lacertid species  
38  
39 306 (supplement SI-10). While the longest transcripts of these six KZNFs were assembled from  
40  
41 307 ovarian tissues (Table S16), they were also expressed in all the other tissues analyzed (brain,  
42  
43 308 heart, liver and kidneys).

### 44 45 46 47 48 309 **Impact of rearrangements on sequence evolution**

49  
50  
51  
52 310 Deletions are the most frequent type of SVs in the genome and occurred on both positively  
53  
54 311 selected genes and those with no signs of positive selection. Duplications and insertions only  
55  
56 312 occurred in genes evolving without signs of positive selection while deletions and inversions  
57  
58 313 occurred in genes irrespective of their selective regime. The ratio between number of regions

1  
2  
3  
4  
5  
6  
7  
8  
9  
10  
11  
12  
13  
14  
15  
16  
17  
18  
19  
20  
21  
22  
23  
24  
25  
26  
27  
28  
29  
30  
31  
32  
33  
34  
35  
36  
37  
38  
39  
40  
41  
42  
43  
44  
45  
46  
47  
48  
49  
50  
51  
52  
53  
54  
55  
56  
57  
58  
59  
60  
61  
62  
63  
64  
65

314 with rearrangements or SVs to those with no detected rearrangements was not significantly  
315 different between genes under positive selection and those with no signs of positive selection  
316 (Boschloo's exact test, two-sided; difference in proportion=0.125,  $p=0.06$ ,  $q=0.1$ ). Since this  
317 can be due to abundant indels obscuring the association in other categories of SVs, we tested  
318 the association between each SV category with PSGs separately, applying independent  
319 Boschloo exact-tests (Table S17). An association of PSGs within inversions when compared to  
320 other SV categories was observed, but this did not remain significant after multiple testing  
321 ( $p=0.028$ ,  $q=0.06$ ). We also observed a significant association of PSGs over genes with no signs  
322 of positive selection within inversions compared to both non-rearranged regions ( $p=0.009$ ,  
323  $q=0.03$ ) and collinear regions ( $p=0.006$ ,  $q=0.03$ ). The inversions overlapping PSGs seem to  
324 reflect independent events, since the inversions are located on different contigs in the genome  
325 with size ranges between 70 kbp and 700 kbp.

## 327 **Discussion**

328 We provide the assembled genomes of two closely-related lacertid species, *L. viridis* and *L.*  
329 *bilineata*, investigated their history of divergence and analyzed the patterns of genomic  
330 variation between these species.

331 The assembly contiguity was highest with partial error correction of PacBio reads (without  
332 splitting at chimeric junctions) followed by hybrid assembly through DBG2OLC implementing  
333 removal of chimeric joins. This hybrid assembly strategy aided in generating high quality  
334 contig-level genomes with moderate genome coverages (~35X Illumina and ~15X PacBio).  
335 Our lacertid genome assemblies showed higher completeness than the available lizard genomes  
336 (Table S1).

337 The time of population divergence between *L. viridis* and *L. bilineata* was estimated as at least  
1  
2 338 1.15 Mya which is lower than the mitochondrial divergence time of 2.6-3.4 Mya previously  
3  
4  
5 339 estimated [33, 69]. *L. viridis* and *L. bilineata* show a high level of genome-wide differentiation  
6  
7 340 ( $F_{ST}=0.688$ ). The best demographic model (M3.3) supported unidirectional gene flow from *L.*  
8  
9 341 *bilineata* to *L. viridis* and higher effective population size for *L. viridis* than *L. bilineata*  
10  
11 342 consistent with the difference in genetic diversity between the two lacertid species.  
12  
13

14  
15 343 Species-specific diversity within various ncRNA classes and adaptive differences in ncRNA  
16  
17 344 orthologs capable of altering their secondary structures are two important factors contributing  
18  
19 345 to evolutionary divergence, since varying ncRNA structures imply functional changes [17].  
20  
21  
22 346 Copy number variation and differences in the content of miRNA families hint at variability in  
23  
24 347 gene regulatory networks between the lacertid sister species. Species-specific splicing  
25  
26 348 mechanisms can be attributed to the losses of snoRNA families (SNORA17 and SNORA20) in  
27  
28 349 *L. bilineata* and structural changes in SNORD61, which is involved in dosage compensation in  
29  
30 350 humans [70].  
31  
32  
33  
34  
35

36 351 Positive selection of sites in NASP and PDLIM1 in the lacertid ancestral branch compared to  
37  
38 352 distant background branches, including mammals and birds, may indicate disparate  
39  
40 353 evolutionary changes in the ancestor of *L. viridis* and *L. bilineata* with regard to reproductive  
41  
42 354 processes i.e. spermatogenesis, fertilization and embryo implantation [71-74]. In contrast,  
43  
44 355 positive selection acting on coding sites in just one lacertid species after their split suggests  
45  
46 356 adaptive differences which could play a role in the speciation process [75-77].  
47  
48  
49  
50

51 357 UV-reflectance of plumages in birds is an important trait involved in the sexual selection of  
52  
53 358 morphologically similar sibling species of Passeriformes [78]. Sexual selection in *L. viridis* has  
54  
55 359 been linked to UV-response. Males with more UV-reflective patches on the skin are preferably  
56  
57 360 selected by the females [79, 80]. We show that hyaluronidases, known to be differentially  
58  
59  
60  
61  
62  
63  
64  
65

361 expressed on exposure to UV-B in the skin of mice [68, 81, 82] evolved rapidly in *L. viridis*.  
362 We speculate that differential cutaneous response to UV through changes in the chondroitin  
363 sulfate (CS) biosynthesis pathway could be driven by mating preferences, which could  
364 ultimately contribute to speciation. Further studies are needed to test this hypothesis.

365 KRAB-ZNFs or KZNFs (zinc finger proteins with a *Krüppel*-associated box (KRAB)) are  
366 transcriptional regulators confined to tetrapod vertebrates [83] and are known to play a role in  
367 species specific changes in gene regulatory network through binding domain differences  
368 between humans and chimps [6, 84-87]. The divergence of transcription factors, especially  
369 differences in DNA-binding regions of KZNFs as observed here, could eventually have  
370 contributed to some degree of reproductive isolation between the two species, which should be  
371 further tested. This receives further support from adaptive differences in the transcription  
372 factors (UBIP1 and RPA2) crucial for spermatogenesis [63, 64]. Varying levels of purifying  
373 selection in genes influencing forebrain development and behaviour suggest different selective  
374 constraints between *L. viridis* and *L. bilineata*. The behavioural differences can be related to  
375 varying ecological habitats and environmental conditions [35] after the split of *L. viridis* and *L.*  
376 *bilineata*. Selective differences in genes related to behaviour and brain development have been  
377 reported to be involved in the diversification of anoles [32].

378 Genomic regions harbouring inversions are known to suppress recombination in  
379 heterokaryotypes facilitating speciation in the presence of gene flow [88] and in maintaining  
380 favourable combinations of locally adapted alleles at different loci [89]. Genomic inversions  
381 between the two lacertid species are significantly associated with positively selected genes  
382 (PSGs). Two of the three PSGs occurring within inversions play a role in cognitive and  
383 reproductive functions (GPR155 and TDRD3), suggesting that they could be involved in  
384 speciation. However, it is currently unknown if these inversions represent fixed differences  
385 between the two species and the lengths of these inversions is at a lower scale (less than 1 Mbp)

386 than those known to play a role in adaptation and speciation [10]. Future studies should try to  
387 address these issues, as well as the role of these genes in reproductive isolation between *L.*  
388 *viridis* and *L. bilineata*.

389

## 390 **Conclusions**

391 We assembled the first high quality genomes of two closely-related species of European green  
392 lizards with a cost-effective strategy. Genes related to transcriptional regulation, behaviour,  
393 neural and reproductive development have diversified the most between the two lacertid  
394 species. Species-specific diversity of ncRNAs, adaptive evolution in regulatory elements and  
395 transcription factors (including binding domain differences in KZNFs) indicate variation in  
396 gene regulatory networks between the two species. Adaptive evolution of genes responsible for  
397 differential cutaneous response to UV-exposure, in particular, could be driven by mate choice,  
398 and ultimately contribute to reproductive isolation. Altogether, we provide the first  
399 comprehensive study of the evolutionary history, genic, structural and regulatory differences  
400 between the genomes of two closely-related lacertid species. This comprises an important  
401 baseline for understanding the genomic regions and mechanisms involved in the speciation of  
402 European green lizards. In addition to a detailed analysis of the demographic history and  
403 evolutionary scenario of European green lizards, our study provides valuable resources that will  
404 help establish conservation guidelines for lacertids experiencing population declines due to  
405 habitat loss [90].

406

## 407 **Materials and Methods**

## 408 **Sampling**

1  
2  
3 409 Two adult females were sampled for this study, a *L. viridis* from Tokaj, north-eastern Hungary  
4  
5 410 (21.39775°E, 48.11363°N) (September 2013) and a *L. bilineata* from Mâlain, France  
6  
7  
8 411 (4°48'2.01"E, 47°21'16.27"N) (July 2014). There is no known morphological variation  
9  
10 412 between the individuals of the two species (Figure S1). These represent two of the four main  
11  
12 413 clades within the *L. viridis* complex [33, 34, 38, 91]. Animals were captures with permits of the  
13  
14 414 issuing authorities (please refer to acknowledgements) and handled according to the guidelines  
15  
16 415 of the Herpetological Animal Care and Use Committee (HACC) of the American Society of  
17  
18 416 Ichthyologists and Herpetologists. Tissues from the brain, heart, liver, kidney and ovaries were  
19  
20 417 dissected for tissue-specific transcriptome sequencing and the remaining tissues were stored  
21  
22 418 separately at -80°C.  
23  
24  
25  
26  
27

## 28 419 **Whole-genome and transcriptome sequencing**

29  
30  
31 420 Tail tissue from each sample was digested with proteinase K and genomic DNA was extracted  
32  
33 421 using a chloroform-based method [92]. The whole genome was sequenced using both short  
34  
35 422 (Illumina) and long read (PacBio) sequencing techniques. Short-read libraries with insert sizes  
36  
37 423 of 380bp and 450bp were prepared for each individual separately. The Illumina paired-end  
38  
39 424 sequences were double-indexed using a multiplexing sequencing protocol [93, 94] on a  
40  
41 425 HiSeq2500. SMRTbell™ template library was prepared according to the instructions from  
42  
43 426 PacificBiosciences, Menlo Park, CA, USA, following the Procedure and Checklist – Greater  
44  
45 427 Than 10 kb Template Preparation. Briefly, for preparation of 15kb libraries 10µg (*L. bilineata*)  
46  
47 428 and 20µg (*L. viridis*) genomic DNA was damage-repaired twice, end-repaired and ligated  
48  
49 429 overnight to hairpin adapters applying components from the DNA/Polymerase Binding Kit P6  
50  
51 430 from Pacific BioSciences, Menlo Park, CA, USA. Reactions were carried out according to the  
52  
53 431 manufacturer's instructions. BluePippin™ Size-Selection to greater than 15kb was performed  
54  
55 432 according to the manufacturer's instructions (Sage Science, Beverly, MA, USA). Conditions  
56  
57  
58  
59  
60  
61  
62  
63  
64  
65



433 for annealing of sequencing primers and binding of polymerase to purified SMRTbell™  
434 template were assessed with the Calculator in RS Remote, PacificBiosciences, Menlo Park, CA,  
435 USA. Long-read sequencing was carried out for both genomes with 20 SMRT Cells applying  
436 P6-C4 chemistry on a PacBio RS-II sequencer. Average PacBio read lengths of 14kb and 12kb  
437 were retrieved for *L. viridis* and *L. bilineata*, respectively.

438 RNA from each tissue was extracted using Trizol Reagent (Life Technologies, Carlsbad, CA,  
439 USA) and purified with the RNeasy® Mini Kit (Qiagen, Hilden, Germany). The mRNA was  
440 purified using the Dynabeads® mRNA Purification Kit (Life Technologies, Carlsbad, CA,  
441 USA). The purity and concentration of RNA and cDNA were checked using Nanodrop and  
442 Bioanalyzer 2100 (Agilent Technologies, CA, USA) and fragments of length 200-250bp were  
443 obtained using Ambion® RNA fragmentation reagent. The first and second strands of cDNA  
444 were synthesized using random hexamer primers with SuperScript® II reverse transcriptase  
445 (Life Technologies, Carlsbad, CA, USA) and DNA Polymerase I with RNase H treatment (Life  
446 Technologies, Carlsbad, CA, USA) respectively.

447 *L. viridis* was sequenced on a single lane for a more accurate estimate of genome size and repeat  
448 content. In order to avoid lane- and run-biases, sequencing was distributed over three lanes with  
449 all genomes and transcriptomes.

#### 450 **Non-coding RNA (ncRNA) annotation and Repeat analysis**

451 Small ncRNAs were annotated on the genomic contigs by performing an infernal cmscan  
452 (V1.1.1) using the RFAM covariance models as input and homologous ncRNA genes were  
453 filtered with a cut-off of 1e-06 [95, 96].

454 Additionally, ncRNA class-specific annotation methods were used for tRNAs, snoRNAs and  
455 miRNAs. tRNAs were annotated using tRNAscan-SE with default parameters [97]. The  
456 BLAST-based snoStrip pipeline [98] was used to annotate snoRNAs. A comprehensive set of

457 snoRNAs from vertebrates and aves were used as query set [99]. To detect miRNAs, the avian  
1  
2 458 set of miRNAs were used as query sequences for a BLAST search in the lizard genomes. All  
3  
4  
5 459 resulting blast hits were filtered for the conservation of the seed region. The annotated snoRNAs  
6  
7 460 and miRNAs in lacertids were validated by blast searches against this reference database and  
8  
9  
10 461 mature miRNA sequence homologies were used. In the case of overlapping miRNA and  
11  
12 462 snoRNA annotations, both were retained as it is known that snoRNAs can be processed into  
13  
14 463 small derived RNAs (sdRNAs) from miRNA-like RNAs [100]. Putative lincRNAs were  
15  
16  
17 464 predicted based on the transcripts with no coding potential as assessed by Transdecoder [101]  
18  
19 465 and mapping on their respective genome without chimeric paths. Furthermore, only the  
20  
21  
22 466 conserved lincRNAs with one-to-one orthologs between lacertids were retained.

23  
24  
25 467 For comparison, ncRNA families (except lincRNA) were also annotated in other selected  
26  
27 468 sauropsid genomes. A reference database was created using sequenced and annotated genomes  
28  
29  
30 469 from reptiles, aves and other vertebrates. The program ePoPe [102] was used to understand the  
31  
32 470 evolution of snoRNAs and miRNAs in the lacertids through the construction of phylogenetic  
33  
34  
35 471 trees based on the gains and losses of ncRNA families.

36  
37  
38 472 The Repeatmodeler pipeline [103] was used to predict repeats in the genomes of lacertids. The  
39  
40 473 predicted repeat-families were used as initial libraries for *de novo* annotation of repeats using  
41  
42  
43 474 Repeatmasker [104]. The evolution of these repeats was investigated using the repeat library  
44  
45 475 available for tetrapod species (Database: 20140131).

#### 48 49 476 **Population histories, gene flow and coalescence**

50  
51  
52 477 To assess the demographic history between *L. viridis* and *L. bilineata* we used the blockwise  
53  
54 478 composite likelihood approach. We analytically computed the probabilities of mutational  
55  
56  
57 479 configurations in blocks of fixed length using the blockwise site frequency spectrum (bSFS)  
58  
59 480 framework [20].

1  
2  
3  
4  
5  
6  
7  
8  
9  
10  
11  
12  
13  
14  
15  
16  
17  
18  
19  
20  
21  
22  
23  
24  
25  
26  
27  
28  
29  
30  
31  
32  
33  
34  
35  
36  
37  
38  
39  
40  
41  
42  
43  
44  
45  
46  
47  
48  
49  
50  
51  
52  
53  
54  
55  
56  
57  
58  
59  
60  
61  
62  
63  
64  
65

481 We mapped the illumina reads from *L. viridis* and *L. bilineata* to the *L. viridis* reference genome  
482 with BWA MEM [105]. The homozygosity/heterozygosity of each site in both lacertids was  
483 predicted based on the reference genome with freebayes [106] with a minimum read support of  
484 five and minimum allele frequency of 0.2. The intergenic regions of the genome were chopped  
485 into blocks of length 200 bp, this resulted in 5,654,020 blocks in total. The number of four  
486 mutation types defined by the joint SFS (Figure 3) were counted using Heffalump query  
487 (<https://bitbucket.org/ustenzel/heffalump> commit 7773784). In total, 2785 distinct mutational  
488 configurations were obtained, of which 1965 appeared more than once. We then summarized  
489 the frequency of each polymorphism pattern across all blocks [107, 108]. This data summary is  
490 referred to as distribution of bSFS.

491 Blocks containing both fixed differences and shared heterozygous sites, violate the 4-gametes  
492 criterion and 46,825 blocks (0.83%) were removed under the assumption of no recombination  
493 within blocks. To account for physical linkage between adjacent blocks, we assumed that every  
494 1000th block is effectively unlinked, i.e. statistically independent, and corrected InC:L scores  
495 by a factor of 1/200. We fitted thirteen different demographic scenarios (Figure 2) accounting  
496 for the presence or absence of gene flow, direction of gene flow, continuous or discrete  
497 migration and changes in effective population sizes. Models were compared using the Akaike  
498 information criterion (AIC) of their composite log-likelihoods.

499 We estimated the generation length based on the mean age of the mothers of all offspring [109]  
500 given the age structure data by Elbing [110] and Saint Girons *et al.* [111] for three German  
501 populations of *L. viridis* and two French populations of *L. bilineata*, respectively. In captivity,  
502 females that breed for the first time lay on average 8.5 eggs, whereas older females lay 11.1  
503 eggs [112]. Given this data, we estimated a mean generation length of 3.6 and 2.9 years for *L.*  
504 *viridis* and *L. bilineata*, respectively. We therefore assumed a generation time of about 3-4 years  
505 for both species. To scale our result in real-time, we used a mutation rate of  $1 \times 10^{-9}$  per site per

1  
2  
3  
4  
5  
6  
7  
8  
9  
10  
11  
12  
13  
14  
15  
16  
17  
18  
19  
20  
21  
22  
23  
24  
25  
26  
27  
28  
29  
30  
31  
32  
33  
34  
35  
36  
37  
38  
39  
40  
41  
42  
43  
44  
45  
46  
47  
48  
49  
50  
51  
52  
53  
54  
55  
56  
57  
58  
59  
60  
61  
62  
63  
64  
65

506 generation based on the fourfold degenerate sites of the single-copy gene orthologs between *L.*  
507 *viridis* and *L. bilineata* (supplementary methods SM-4). The lower limit of the mutation rate  
508 was assumed as  $1.77 \times 10^{-8}$  per site per generation (3.5 years as the generation time) based on  
509 the pairwise distance of 6.19% in the cytochrome b gene between *L. viridis* and *L. bilineata*  
510 [34]. This assumption is similar to the mutation rate of NADH-2 in *A. carolinensis* (1.3%  
511 mutations per million years) [113].

## 512 **Detection of genomic rearrangements from read-based pipelines and syntenic blocks**

513 Genomic rearrangements between the lacertids were detected based on both read-based  
514 methods and syntenic blocks information. *L. viridis* was used as the reference genome since the  
515 assembly was more contiguous for this species. Genomic reads from *L. bilineata* were used as  
516 the query and the reads of *L. viridis* mapped against the reference were used as control.

517 **Read-based pipelines:** Genomic rearrangements were detected between lacertids using read  
518 mapping based methods for Illumina paired-end reads and for PacBio-reads separately,  
519 followed by SV callers specifically developed to deal with short and long read sequences,  
520 respectively. In both approaches, reads of *L. bilineata* (query) and of *L. viridis* (control) were  
521 separately mapped against the same reference (*L. viridis*).

522 The alignment of Illumina reads was carried out with BWA MEM [105] and rearrangements  
523 were detected with MetaSV [114] pipeline which uses Breakdancer [115] to infer structural  
524 variants (SVs) using paired-end read information, CNVnator [116] to predict copy-number  
525 variants (CNVs) from abnormal read-coverages and Pindel [117] to detect large SV-related  
526 breakpoint events. The insert-size was estimated as  $400 \pm 50$  from one million observations  
527 based on the alignment of paired-end Illumina reads. A minimum support of five reads and  
528 mapping quality of 30 was set as the threshold to support SVs from Breakdancer. A bin-size of  
529 500 was used to run CNVnator and only precise SV-events were called. While for Pindel, only

530 variants with minimum read support of 5 paired-reads were used. MetaSV pipeline was used to  
1  
2 531 merge the SVs from these three different SV-callers and local *de novo* assemblies were  
3  
4 532 constructed using the ABYSS assembler for insertions. In order to maintain a high level of  
5  
6  
7 533 sensitivity and specificity (>90%) in the detection of SVs, only the rearrangements called with  
8  
9  
10 534 a minimum support of 8 uniquely mapped paired-end reads were used for further analyses  
11  
12 535 [118].

13  
14  
15 536 The PacBio reads were aligned to the reference with NGMLR and the alignment was fed to  
16  
17 537 Sniffles SV-caller [11] to call variants with a minimum support of seven reads (at least half of  
18  
19  
20 538 the PacBio genome coverage of 14X).

21  
22  
23 539 ***Syntenic blocks approach:*** In addition to read-based methods, rearrangements were also  
24  
25 540 detected from the blocks of synteny obtained through the UCSC pipeline [119]. The alignments  
26  
27  
28 541 were converted to single-coverage genomes using `single_cov2` of the MultiZ pipeline [120] to  
29  
30 542 avoid spurious assignments. Strand changes within syntenic blocks were clustered as inversions  
31  
32  
33 543 (I) based on the orientation of the successive (I+1) and preceding (I-1) blocks. Regions with  
34  
35 544 missing bases in the query alone were predicted to be deletions while gaps in the reference  
36  
37  
38 545 genome alone were considered as insertions. Additionally, Hierarchical Alignment (HAL)  
39  
40 546 format [121] of the single-coverage genomes was used to predict rearrangements with the  
41  
42  
43 547 `halBranchMutations` tool. This tool generates annotations for the location of rearrangements  
44  
45 548 based on the branch of interest in the HAL file (between *L. viridis* and *L. bilineata* in our case).  
46  
47  
48 549 The events detected in both directions i.e. *L. viridis* reference with *L. bilineata* as query and *L.*  
49  
50 550 *bilineata* reference and *L. viridis* as query were retained. The length threshold was set to 50bp  
51  
52  
53 551 and the predicted rearrangements were filtered based on quality to reduce false-positives  
54  
55 552 (supplement SM-7).

56  
57  
58 553 Segmental duplications in the two lacertid species were detected by self-aligning the two  
59  
60 554 genomes separately with chained LASTZ [122] (step=9, H=3000, K=5000). High identity

1 555 matches (90% identity) within each genome of 1kb or more were defined as segmental  
2 556 duplications.  
3  
4

### 5 557 **Structural selection in non-coding RNAs (ncRNA)**

6  
7

8  
9 558 The predicted ncRNAs (miRNA, snoRNA, tRNA and lincRNA) in lacertids were tested for  
10  
11 559 structural selection (selection of sites acting on secondary structure in either of the lacertids)  
12  
13 with *Gekko japonicus* as outgroup. We used the Selection on the Secondary Structure test (SSS-  
14 560 test) [123], a statistical test that assigns selection scores for each given sequence based on the  
15  
16 561 comparison between the structure of the given sequence and the structure of group consensus.  
17  
18 562 It also provides a diversity value for the family that indicates its structural conservation. The  
19  
20 563 diversity value (d-score) is the family's median vase-pair distance to its consensus. The  
21  
22 564 miRNAs, snoRNAs and tRNAs were divided into sub-groups based on their families or their  
23  
24 565 anti-codon sequences, and only those sub-groups with at least three sequences were tested. The  
25  
26 566 groups that exhibited high structural diversity (median base pair distance to the consensus,  
27  
28 567  $d \geq 10.0$ ) were excluded from further analyses.  
29  
30  
31  
32  
33  
34  
35

36 569 A ncRNA structural test to detect positively selected structures is only appropriate for  
37  
38 570 structurally conserved groups. Low d-score values ( $d < 10.0$ ) were used to distinguish  
39  
40 571 conservation chosen based on structural uniformity of the groups. This cut-off was based on the  
41  
42 572 visual inspection of the secondary structures of families with d-scores of 1 to 20. Secondary  
43  
44 573 structures of ncRNA sequences were predicted using RNAfold [124]. In a similar fashion,  
45  
46 574 structures with selection scores of 0 to 30 were visually compared to the structure of their group  
47  
48 575 consensus. High selection scores ( $s \geq 10.0$ ) were used to predict the positively selected sequences  
49  
50 576 of small ncRNAs. Secondary structures with high selection scores were manually inspected to  
51  
52 577 remove false positives. Specifically, the candidates with structures of low stability or those  
53  
54 578 fundamentally dissimilar to the family consensus indicating loss of function were excluded.  
55  
56  
57  
58  
59  
60  
61  
62  
63  
64  
65

1  
2 579 The selection test was adapted for lincRNAs and performed only on the two lacertid species  
3  
4 580 without any outgroup since lincRNA annotations of other closely-related species were  
5  
6 581 unavailable. Since the positive selection of secondary structure cannot be determined without  
7  
8 582 outgroups, we instead detected divergence of lincRNA structure within the lacertids. Local  
9  
10 583 conserved structure blocks were predicted for the orthologous lincRNA families and these  
11  
12 584 blocks were subjected to an adaptation of SSS-test based on local structures. The structural  
13  
14 585 selection for lincRNAs was assessed locally, since most base-pairings occur between  
15  
16 586 nucleotides within a short distance [123, 125]. Local blocks of high structural diversity were  
17  
18 587 excluded from further analysis. Since outgroups were not used for lincRNAs, a lower selection  
19  
20 588 score threshold ( $s \geq 4.0$ ) was applied to detect divergent candidates which were visually  
21  
22 589 inspected later to exclude false-positives.  
23  
24  
25  
26

## 27 590 **Ortholog prediction and selection tests**

28  
29  
30

31 591 In order to investigate the selection pressure in the lacertid branch (ancestor of *L. viridis* and *L.*  
32  
33 592 *bilineata*) compared to other vertebrates, the coding sequences (CDS) of five species, namely  
34  
35 593 anole lizard (*Anolis carolinensis*), chicken (*Gallus gallus*), frog (*Xenopus tropicalis*), spotted  
36  
37 594 garfish (*Lepisosteus oculatus*) and human (*Homo sapiens*) were downloaded from the Ensembl  
38  
39 595 database version 83 [126]. To keep the data consistent and avoid re-annotations, the CDS  
40  
41 596 annotations were also extracted from the Ensembl database. The orthologs between the protein-  
42  
43 597 coding sequences of the species were identified with ProteinOrtho V5 using the synteny option  
44  
45 598 to reduce false orthologs assignments. The output was converted to run the POTION pipeline  
46  
47 599 [127] which tests for selection acting on protein coding genes. Only the single-copy orthologs  
48  
49 600 in each species were retained for each orthologous group.  
50  
51  
52  
53  
54

55 601 The protein identity filtering in POTION was set to 30% in each orthologous group and  
56  
57 602 sequence size limits to more than 10 times or less than 0.2 of the median size in the group. Only  
58  
59 603 groups with at least 4 species were retained. The sequences in each orthologous group (after  
60  
61  
62  
63  
64  
65

1  
2  
3  
4  
5  
6  
7  
8  
9  
10  
11  
12  
13  
14  
15  
16  
17  
18  
19  
20  
21  
22  
23  
24  
25  
26  
27  
28  
29  
30  
31  
32  
33  
34  
35  
36  
37  
38  
39  
40  
41  
42  
43  
44  
45  
46  
47  
48  
49  
50  
51  
52  
53  
54  
55  
56  
57  
58  
59  
60  
61  
62  
63  
64  
65

604 filtering paralogs) were aligned, gap trimmed, phylogenetic trees were constructed and groups  
605 with recombinants were excluded from the selection tests. The intermediates files from the  
606 POTION pipeline were used to generate unrooted trees with lacertids (*L. viridis* and *L.*  
607 *bilineata*) in the foreground branches. The remaining species were used as the background to  
608 test for positive-selection using the branch-site model of codeml within the PAML  
609 package[128]. A likelihood ratio test (LRT) based on  $\chi^2$  distribution was used to detect genes  
610 with significant positive selection followed by multiple testing through Benjamini–Hochberg  
611 (BH) procedure. Genes with  $p < 0.05$  and  $q < 0.05$  were retained and referred to as being  
612 positively selected in the lacertid branch.

613 To detect adaptive evolution through positive selection within either lacertids, additional tests  
614 (PAML branch-site models) were performed with less distant outgroups using a set of five  
615 lizard species, namely *L. viridis*, *L. bilineata*, *Anolis carolinensis*, *Gekko japonicus* and *Pogona*  
616 *vitticeps*. The single-copy orthologs were identified with ProteinOrtho with a minimum protein  
617 identity of 70%, e-value of 1e-06 and minimum similarity of 0.99 for additional hits. The  
618 orthologous coding sequences from the five lizard species were aligned with MACSE while  
619 accounting for frame-shifts and the stop codon at the end of the sequence was removed.  
620 Unrooted trees were generated with three different foreground branches: i) lacertids (*L. viridis*  
621 and *L. bilineata*) ii) *L. viridis* alone and iii) *L. bilineata* alone. The rest of the workflow for  
622 detection of recombinants, removal of gaps and codeml tests was similar to the POTION  
623 pipeline followed by filtering for significant candidate genes ( $p < 0.05$ ,  $q < 0.05$ ). In order to  
624 avoid false predictions of positively selected sites (PSS) at the beginning or towards the end of  
625 alignments, where mismatches were allowed, the candidate genes predicted to contain PSS in  
626 either species were visually inspected.



628 **Data Access**

1  
2  
3  
4 629 The genome assembly, transcript data, DNA and RNA sequencing reads have been deposited  
5  
6 630 in the European Nucleotide Archive under the Bioproject PRJEB24178.  
7  
8

9  
10 631 GCA\_900245905 - *L. viridis* genome assembly  
11

12 632 GCA\_900245895 - *L. bilineata* genome assembly  
13  
14

15 633 The transcript assemblies, genome browser and online BLAST databases for the lacertid data  
16  
17  
18 634 are hosted at <http://lacerta.bioinf.uni-leipzig.de>  
19  
20

21 635 Genome annotations, variant calls (VCFs) and other supporting datasets are available at  
22  
23  
24 636 <http://doi.org/10.5281/zenodo.1219810>  
25  
26

27 637 The supporting files for the demography analysis including the Mathematica notebooks input  
28  
29  
30 638 files are provided at <https://bitbucket.org/amin-saffari/reversegame/src/master/>  
31  
32

33  
34 639  
35  
36

37 640 **Declarations**  
38  
39  
40

41 641 **Acknowledgements**  
42

43 642 The authors thank Annegrett Grimm for the sample collection and providing the photos of the  
44  
45  
46 643 two species; Conrad Helm, Detlef Bernhard, Michael Gerth, Ronny Wolf and Stefan Schaffer  
47  
48  
49 644 for their help in the laboratory; Steve Hoffmann and Thomas Hackl for valuable discussions  
50  
51 645 and Stephane Peyrégne for helpful suggestions and proofreading. The specimen from Hungary  
52  
53  
54 646 was kindly collected and provided by the team of Szabolcs Lengyel, Centre for Ecological  
55  
56 647 Research, Hungarian Academy of Science. Capture permit (No. 13778-7/ 2013) was issued by  
57  
58 648 the North Hungarian Environmental Protection, Nature Conservation and Water Management  
59  
60  
61 649 Inspectorate. Capture permit (No. 36) for the French specimen was issued by the Préfet de la  
62  
63  
64  
65

650 Côte d’Or. RF was financed by FCT [grant number SFRH/BPD/89313/2012] and is currently  
1  
2 651 funded by the European Union’s Horizon 2020 research and innovation programme, under the  
3  
4  
5 652 Marie Skłodowska-Curie grant agreement number 706376.  
6  
7

### 8 653 **Funding**

9

10 654 This project was funded by the Deutsche Forschungsgemeinschaft (FZT 118).  
11  
12  
13

### 14 655 **Declaration of interest**

15

16 656 The authors report no conflicts of interest. The authors alone are responsible for the content and  
17  
18  
19 657 writing of the paper.  
20  
21

### 22 658 **Author contributions**

23

24  
25 659 K. H. collected the samples; A. W. Illumina sequenced the genome and transcriptome; C. S.,  
26  
27 660 B. B. and J. O. were involved in the PacBio genome sequencing; S. R. R. K. performed the  
28  
29  
30 661 assembly and annotation; S. K. and S. R. R. K. annotated the non-coding RNA; M. B. W. C.  
31  
32 662 analyzed selection in non-coding RNA; S. R. R. K. and H. I. performed the positive selection  
33  
34  
35 663 analysis; S. R. R. K. and M. C. analyzed structural variants; A. S. and K. L. analysed the  
36  
37 664 population histories; S. R. R. K., R. F., K. N., P. F. S. and M. S. wrote the initial draft of the  
38  
39  
40 665 manuscript; H. I., M. C., A.S., K. L., S. K., M. B. W. C., J. O., B. B., C. B. and K. H. edited the  
41  
42 666 manuscript; R.F., K. N., K. H., P. F. S. and M. S. conceived the study.  
43  
44

### 45 667 **Additional files**

46

47  
48 668 Additional file 1: This supplement contains methods SM1-SM11, information SI1-SI11,  
49  
50  
51 669 Figures S1–S10, Tables S1–S17 and References.  
52

53 670 Additional file 2: The figure for the contig clusters in lacertids generated from synteny  
54  
55 671 information between *L. viridis* and *L. bilineata*.  
56

57  
58 672 Additional file 3: *Mathematica* notebook containing the code used and other supporting  
59  
60 673 information from the demography analysis of *L. viridis* and *L. bilineata*.  
61  
62  
63  
64  
65

## References

1. Coyne JA, Orr HA: **Speciation**: Sinauer Associates; 2004.
2. Presgraves DC: **The molecular evolutionary basis of species formation**. *Nat Rev Genet* 2010, **11**(3):175-180.
3. Charlesworth B, Coyne JA, Barton N: **The Relative Rates of Evolution of Sex Chromosomes and Autosomes**. *American naturalist* 1987, **130**(1):113-146.
4. Masly JP, Presgraves DC: **High-resolution genome-wide dissection of the two rules of speciation in *Drosophila***. *PLoS Biol* 2007, **5**(9):e243.
5. Mack KL, Campbell P, Nachman MW: **Gene regulation and speciation in house mice**. *Genome Res* 2016, **26**(4):451-461.
6. Nowick K, Carneiro M, Faria R: **A prominent role of KRAB-ZNF transcription factors in mammalian speciation?** *Trends Genet* 2013, **29**(3):130-139.
7. Ortiz-Barrientos D, Kane NC: **Meeting review: American Genetics Association Symposium on the genetics of speciation**. *Mol Ecol* 2007, **16**(14):2852-2854.
8. Ravinet M, Faria R, Butlin RK, Galindo J, Bierne N, Rafajlović M, Noor MAF, Mehlig B, Westram AM: **Interpreting the genomic landscape of speciation: a road map for finding barriers to gene flow**. *Journal of Evolutionary Biology* 2017, **30**(8):1450-1477.
9. Seehausen O, Butlin RK, Keller I, Wagner CE, Boughman JW, Hohenlohe PA, Peichel CL, Saetre GP, Bank C, Brannstrom A *et al*: **Genomics and the origin of species**. *Nat Rev Genet* 2014, **15**(3):176-192.
10. Wellenreuther M, Bernatchez L: **Eco-Evolutionary Genomics of Chromosomal Inversions**. *Trends in Ecology & Evolution* 2018, **33**(6):427-440.
11. Sedlazeck FJ, Rescheneder P, Smolka M, Fang H, Nattestad M, von Haeseler A, Schatz MC: **Accurate detection of complex structural variations using single-molecule sequencing**. *Nature Methods* 2018.
12. Sudmant PH, Rausch T, Gardner EJ, Handsaker RE, Abyzov A, Huddleston J, Zhang Y, Ye K, Jun G, Hsi-Yang Fritz M *et al*: **An integrated map of structural variation in 2,504 human genomes**. *Nature* 2015, **526**(7571):75-81.
13. Alkan C, Coe BP, Eichler EE: **Genome structural variation discovery and genotyping**. *Nat Rev Genet* 2011, **12**(5):363-376.
14. Davey JW, Barker SL, Rastas PM, Pinharanda A, Martin SH, Durbin R, McMillan WO, Merrill RM, Jiggins CD: **No evidence for maintenance of a sympatric *Heliconius* species barrier by chromosomal inversions**. *Evolution Letters* 2017, **1**(3):138-154.
15. Walter Costa MB, Honer Zu Siederdisen C, Tulpan D, Stadler PF, Nowick K: **Temporal ordering of substitutions in RNA evolution: Uncovering the structural evolution of the Human Accelerated Region 1**. *J Theor Biol* 2017, **438**:143-150.
16. Frías-Lasserre D, Villagra CA: **The Importance of ncRNAs as Epigenetic Mechanisms in Phenotypic Variation and Organic Evolution**. *Frontiers in Microbiology* 2017, **8**:2483.
17. Bhartiya D, Scaria V: **Genomic variations in non-coding RNAs: Structure, function and regulation**. *Genomics* 2016, **107**(2-3):59-68.
18. Gardner PP, Fasold M, Burge SW, Ninova M, Hertel J, Kehr S, Steeves TE, Griffiths-Jones S, Stadler PF: **Conservation and losses of non-coding RNAs in avian genomes**. *PLoS One* 2015, **10**(3):e0121797.
19. Sousa V, Hey J: **Understanding the Origin of Species with Genome-Scale Data: the Role of Gene Flow**. *Nature reviews Genetics* 2013, **14**(6):404-414.
20. Lohse K, Chmelik M, Martin SH, Barton NH: **Efficient Strategies for Calculating Blockwise Likelihoods Under the Coalescent**. *Genetics* 2016, **202**(2):775-786.

- 722 21. Camargo A, Sinervo B, Sites JW, Jr.: **Lizards as model organisms for linking phylogeographic and speciation studies.** *Mol Ecol* 2010, **19**(16):3250-3270.
- 1 723
- 2 724 22. Thorpe RS, Surget-Groba Y, Johansson H: **The relative importance of ecology and geographic isolation for speciation in anoles.** *Philosophical Transactions of the Royal Society B: Biological Sciences* 2008, **363**(1506):3071.
- 3 725
- 4 726
- 5 727 23. Alfoldi J, Di Palma F, Grabherr M, Williams C, Kong L, Mauceli E, Russell P, Lowe CB, Glor RE, Jaffe JD *et al*: **The genome of the green anole lizard and a comparative analysis with birds and mammals.** *Nature* 2011, **477**(7366):587-591.
- 6 728
- 7 729
- 8 730 24. Gao J, Li Q, Wang Z, Zhou Y, Martelli P, Li F, Xiong Z, Wang J, Yang H, Zhang G: **Sequencing, de novo assembling, and annotating the genome of the endangered Chinese crocodile lizard *Shinisaurus crocodilurus*.** *GigaScience* 2017, **6**(7):1-6.
- 9 731
- 10 732
- 11 733 25. Rice ES, Kohno S, John JS, Pham S, Howard J, Lareau LF, O'Connell BL, Hickey G, Armstrong J, Deran A *et al*: **Improved genome assembly of American alligator genome reveals conserved architecture of estrogen signaling.** *Genome Res* 2017, **27**(5):686-696.
- 12 734
- 13 735
- 14 736 26. Liu Y, Zhou Q, Wang Y, Luo L, Yang J, Yang L, Liu M, Li Y, Qian T, Zheng Y *et al*: **Gekko japonicus genome reveals evolution of adhesive toe pads and tail regeneration.** 2015, **6**:10033.
- 15 737
- 16 738 27. Georges A, Li Q, Lian J, O'Meally D, Deakin J, Wang Z, Zhang P, Fujita M, Patel HR, Holleley CE *et al*: **High-coverage sequencing and annotated assembly of the genome of the Australian dragon lizard *Pogona vitticeps*.** *GigaScience* 2015, **4**(1):45.
- 17 739
- 18 740
- 19 741 28. Castoe T, Koning A, Hall K, Card D, Schield D, Fujita M: **The Burmese python genome reveals the molecular basis for extreme adaptation in snakes.** *Proc Natl Acad Sci U S A* 2013, **110**.
- 20 742
- 21 743 29. Vonk F, Casewell N, Henkel C, Heimberg A, Jansen H, McCleary R: **The king cobra genome reveals dynamic gene evolution and adaptation in the snake venom system.** *Proc Natl Acad Sci U S A* 2013, **110**.
- 22 744
- 23 745
- 24 746 30. Shaffer H, Minx P, Warren D, Shedlock A, Thomson R, Valenzuela N: **The western painted turtle genome, a model for the evolution of extreme physiological adaptations in a slowly evolving lineage.** *Genome Biol* 2013, **14**.
- 25 747
- 26 748
- 27 749 31. Wang Z, Pascual-Anaya J, Zadissa A, Li W, Niimura Y, Huang Z: **The draft genomes of soft-shell turtle and green sea turtle yield insights into the development and evolution of the turtle-specific body plan.** *Nat Genet* 2013, **45**.
- 28 750
- 29 751
- 30 752 32. Tollis M, Hutchins ED, Stapley J, Rupp SM, Eckalbar WL, Maayan I, Lasku E, Infante CR, Dennis SR, Robertson JA *et al*: **Comparative Genomics Reveals Accelerated Evolution in Conserved Pathways during the Diversification of Anole Lizards.** *Genome Biology and Evolution* 2018, **10**(2):489-506.
- 31 753
- 32 754
- 33 755
- 34 756 33. Böhme MU, Fritz U, Kotenko T, Georg D, Ljubisavljević K, Tzankov N, Berendonk TU: **Phylogeography and cryptic variation within the *Lacerta viridis* complex (Lacertidae, Reptilia).** *Zoologica Scripta* 2007, **36**(2):119-131.
- 35 757
- 36 758
- 37 759 34. Marzahn E, Mayer W, Joger U, Ilgaz Ç, Jablonski D, Kindler C, Kumlutaş Y, Nistri A, Schneeweiss N, Vamberger M *et al*: **Phylogeography of the *Lacerta viridis* complex: mitochondrial and nuclear markers provide taxonomic insights.** *Journal of Zoological Systematics and Evolutionary Research* 2016, **54**(2):85-105.
- 38 760
- 39 761
- 40 762
- 41 763 35. Tvrtkovi N, Lazar B, Tome S, Grbac I: **The western green lizard *Lacerta (viridis) bilineata* Daudin, 1804 (Sauria: Lacertidae) in Slovenia and Croatia.** *Natura Croatica* 1998, **7**(4):363-369.
- 42 764
- 43 765
- 44 766 36. Amann T, Rykena S, Joger U, Nettmann HK, Veith M: **Zur artlichen Trennung von *Lacerta bilineata* DAUDIN, 1802 und *L. viridis* (LAURENTI, 1768)** *Salamandra* 1997, **33**(4):255-268.
- 45 767
- 46 768 37. Joger U, Amann T, Veith M: **Phylogeographie und genetische differenzierung im *Lacerta viridis/bilineata* komplex.** *Mertensiella* 2001, **13**:60-68.
- 47 769
- 48 770 38. Rykena S: **Kreuzungsexperimente zur Prüfung der Artgrenzen im Genus *Lacerta* sensu stricto.** *Zoosystematics And Evolution* 1991, **67**(1):55-68.
- 49 771
- 50 772 39. Noor MA, Grams KL, Bertucci LA, Reiland J: **Chromosomal inversions and the reproductive isolation of species.** *Proc Natl Acad Sci U S A* 2001, **98**(21):12084-12088.
- 51 773
- 52
- 53
- 54
- 55
- 56
- 57
- 58
- 59
- 60
- 61
- 62
- 63
- 64
- 65

- 774 40. Navarro A, Barton NH: **Chromosomal speciation and molecular divergence--accelerated evolution in rearranged chromosomes.** *Science* 2003, **300**(5617):321-324.
- 1 775
- 2 776 41. Faria R, Navarro A: **Chromosomal speciation revisited: rearranging theory with pieces of evidence.** *Trends Ecol Evol* 2010, **25**(11):660-669.
- 3 777
- 4 778 42. Olmo E: **Rate of chromosome changes and speciation in reptiles.** *Genetica* 2005, **125**(2-3):185-203.
- 5 779
- 6 780 43. Olmo E, Odierna G, Cobror O: **C-band variability and phylogeny of Lacertidae.** *Genetica* 1986, **71**:63-74.
- 7 781
- 8 782 44. Kupriyanova L, Kuksin A, Odierna G: **Karyotype, chromosome structure, reproductive modalities of three Southern Eurasian populations of the common lacertid lizard, Zootoca vivipara (Jacquin, 1787).** *Acta Herpetologica; Vol 3, No 2 (2008)* 2008.
- 9 783
- 10 784
- 11 785 45. Liu H, Chang LH, Sun Y, Lu X, Stubbs L: **Deep Vertebrate Roots for Mammalian Zinc Finger Transcription Factor Subfamilies.** *Genome Biol Evol* 2014, **6**(3):510-525.
- 12 786
- 13 787 46. Smeds L, Qvarnström A, Ellegren H: **Direct estimate of the rate of germline mutation in a bird.** *Genome Research* 2016, **26**(9):1211-1218.
- 14 788
- 15 789 47. Nam K, Mugal C, Nabholz B, Schielzeth H, Wolf JBW, Backström N, Künstner A, Balakrishnan CN, Heger A, Ponting CP *et al*: **Molecular evolution of genes in avian genomes.** *Genome Biology* 2010, **11**(6):R68-R68.
- 16 790
- 17 791
- 18 792 48. Chiarelli AB, Capanna E: **Cytotaxonomy and Vertebrate Evolution Edited by A.B. Chiarelli and E. Capanna; 1973.**
- 19 793
- 20 794 49. Townsend TM, Mulcahy DG, Noonan BP, Sites JW, Kuczynski CA, Wiens JJ, Reeder TW: **Phylogeny of iguanian lizards inferred from 29 nuclear loci, and a comparison of concatenated and species-tree approaches for an ancient, rapid radiation.** *Molecular Phylogenetics and Evolution* 2011, **61**(2):363-380.
- 21 795
- 22 796
- 23 797
- 24 798 50. Deakin JE, Edwards MJ, Patel H, O'Meally D, Lian J, Stenhouse R, Ryan S, Livernois AM, Azad B, Holleley CE *et al*: **Anchoring genome sequence to chromosomes of the central bearded dragon (Pogona vitticeps) enables reconstruction of ancestral squamate macrochromosomes and identifies sequence content of the Z chromosome.** *BMC Genomics* 2016, **17**:447.
- 25 799
- 26 800
- 27 801
- 28 802
- 29 803 51. Bermudez-Santana C, Attolini CS-O, Kirsten T, Engelhardt J, Prohaska SJ, Steigle S, Stadler PF: **Genomic organization of eukaryotic tRNAs.** *BMC Genomics* 2010, **11**(1):270.
- 30 804
- 31 805 52. Bunnefeld L, Frantz LA, Lohse K: **Inferring Bottlenecks from Genome-Wide Samples of Short Sequence Blocks.** *Genetics* 2015, **201**(3):1157-1169.
- 32 806
- 33 807 53. Zhao P, Li J, Kang H, Wang H, Fan Z, Yin Z, Wang J, Zhang Q, Wang Z, Liu J-F: **Structural Variant Detection by Large-scale Sequencing Reveals New Evolutionary Evidence on Breed Divergence between Chinese and European Pigs.** 2016, **6**:18501.
- 34 808
- 35 809
- 36 810 54. Kiss T, Fayet-Lebaron E, Jády BE: **Box H/ACA Small Ribonucleoproteins.** *Molecular Cell* 2010, **37**(5):597-606.
- 37 811
- 38 812 55. Matsunaga S, Takata H, Morimoto A, Hayashihara K, Higashi T, Akatsuchi K, Mizusawa E, Yamakawa M, Ashida M, Matsunaga TM *et al*: **RBMX: a regulator for maintenance and centromeric protection of sister chromatid cohesion.** *Cell Rep* 2012, **1**(4):299-308.
- 39 813
- 40 814
- 41 815 56. Sun R-P, Xi Q-Y, Sun J-J, Cheng X, Zhu Y-L, Ye D-Z, Chen T, Wei L-M, Ye R-S, Jiang Q-Y *et al*: **In low protein diets, microRNA-19b regulates urea synthesis by targeting SIRT5.** *Scientific Reports* 2016, **6**:33291.
- 42 816
- 43 817
- 44 818 57. Wang T, Xu Z: **miR-27 promotes osteoblast differentiation by modulating Wnt signaling.** *Biochem Biophys Res Commun* 2010, **402**(2):186-189.
- 45 819
- 46 820 58. Clevers H, Loh KM, Nusse R: **Stem cell signaling. An integral program for tissue renewal and regeneration: Wnt signaling and stem cell control.** *Science* 2014, **346**(6205):1248012.
- 47 821
- 48 822 59. Ricklefs RE, Losos JB, Townsend TM: **Evolutionary diversification of clades of squamate reptiles.** *J Evol Biol* 2007, **20**(5):1751-1762.
- 49 823
- 50 824 60. van Hazel I, Sabouhanian A, Day L, Endler JA, Chang BSW: **Functional characterization of spectral tuning mechanisms in the great bowerbird short-wavelength sensitive visual**
- 51 825
- 52
- 53
- 54
- 55
- 56
- 57
- 58
- 59
- 60
- 61
- 62
- 63
- 64
- 65

- 826 pigment (SWS1), and the origins of UV/violet vision in passerines and parrots. *BMC*  
1 827 *Evolutionary Biology* 2013, **13**:250-250.
- 2 828 61. de Lanuza GPI, Font E: **Ultraviolet vision in lacertid lizards: evidence from retinal structure,**  
3 829 **eye transmittance, SWS1 visual pigment genes and behaviour.** *The Journal of Experimental*  
4 830 *Biology* 2014, **217**(16):2899.
- 5 831 62. Laurent S, Pfeifer SP, Settles ML, Hunter SS, Hardwick KM, Ormond L, Sousa VC, Jensen JD,  
6 832 Rosenblum EB: **The population genomics of rapid adaptation: disentangling signatures of**  
7 833 **selection and demography in white sands lizards.** *Molecular Ecology* 2016, **25**(1):306-323.
- 8 834 63. Kim JS, Chae JH, Cheon YP, Kim CG: **Reciprocal localization of transcription factors YY1 and**  
9 835 **CP2c in spermatogonial stem cells and their putative roles during spermatogenesis.** *Acta*  
10 836 *Histochem* 2016, **118**(7):685-692.
- 11 837 64. Elmayan T, Proux F, Vaucheret H: **Arabidopsis RPA2: a genetic link among transcriptional gene**  
12 838 **silencing, DNA repair, and DNA replication.** *Curr Biol* 2005, **15**(21):1919-1925.
- 13 839 65. Trifonov S, Houtani T, Shimizu J-i, Hamada S, Kase M, Maruyama M, Sugimoto T: **GPR155: Gene**  
14 840 **organization, multiple mRNA splice variants and expression in mouse central nervous**  
15 841 **system.** *Biochemical and Biophysical Research Communications* 2010, **398**(1):19-25.
- 16 842 66. Laisk-Podar T, Kaart T, Peters M, Salumets A: **Genetic variants associated with female**  
17 843 **reproductive ageing – potential markers for assessing ovarian function and ovarian**  
18 844 **stimulation outcome.** *Reproductive BioMedicine Online* 2015, **31**(2):199-209.
- 19 845 67. Linder B, Plöttner O, Kroiss M, Hartmann E, Lagerbauer B, Meister G, Keidel E, Fischer U:  
20 846 **Tdrd3 is a novel stress granule-associated protein interacting with the Fragile-X syndrome**  
21 847 **protein FMRP.** *Human Molecular Genetics* 2008, **17**(20):3236-3246.
- 22 848 68. Tobiishi M, Sayo T, Yoshida H, Kusaka A, Kawabata K, Sugiyama Y, Ishikawa O, Inoue S: **Changes**  
23 849 **in epidermal hyaluronan metabolism following UVB irradiation.** *Journal of Dermatological*  
24 850 *Science* 2011, **64**(1):31-38.
- 25 851 69. Kolora SR, Faria R, Weigert A, Schaffer S, Grimm A, Henle K, Sahyoun AH, Stadler PF, Nowick K,  
26 852 Bleidorn C *et al*: **The complete mitochondrial genome of *Lacerta bilineata* and comparison**  
27 853 **with its closely related congener *L. viridis*.** *Mitochondrial DNA Part A* 2017, **28**(1):116-118.
- 28 854 70. Sperveslage J, Hoffmeister M, Henopp T, Klöppel G, Sipos B: **Establishment of robust controls**  
29 855 **for the normalization of miRNA expression in neuroendocrine tumors of the ileum and**  
30 856 **pancreas.** *Endocrine* 2014, **46**(2):226-230.
- 31 857 71. Finn RM, Ellard K, Eirin-Lopez JM, Ausio J: **Vertebrate nucleoplasmin and NASP: egg histone**  
32 858 **storage proteins with multiple chaperone activities.** *FASEB J* 2012, **26**(12):4788-4804.
- 33 859 72. Nagatomo H, Kohri N, Akizawa H, Hoshino Y, Yamauchi N, Kono T, Takahashi M, Kawahara M:  
34 860 **Requirement for nuclear autoantigenic sperm protein mRNA expression in bovine**  
35 861 **preimplantation development.** *Anim Sci J* 2016, **87**(3):457-461.
- 36 862 73. Shang Y, Wang H, Jia P, Zhao H, Liu C, Liu W, Song Z, Xu Z, Yang L, Wang Y *et al*: **Autophagy**  
37 863 **regulates spermatid differentiation via degradation of PDLIM1.** *Autophagy* 2016, **12**(9):1575-  
38 864 1592.
- 39 865 74. Yin J, Ni B, Tian ZQ, Yang F, Liao WG, Gao YQ: **Regulatory effects of autophagy on**  
40 866 **spermatogenesis.** *Biol Reprod* 2017, **96**(3):525-530.
- 41 867 75. Chen J, Shishkin AA, Zhu X, Kadri S, Maza I, Guttman M, Hanna JH, Regev A, Garber M:  
42 868 **Evolutionary analysis across mammals reveals distinct classes of long non-coding RNAs.**  
43 869 *Genome Biol* 2016, **17**:19.
- 44 870 76. Wiberg RA, Halligan DL, Ness RW, Necsulea A, Kaessmann H, Keightley PD: **Assessing Recent**  
45 871 **Selection and Functionality at Long Noncoding RNA Loci in the Mouse Genome.** *Genome Biol*  
46 872 *Evol* 2015, **7**(8):2432-2444.
- 47 873 77. Zhen Y, Andolfatto P: **Methods to detect selection on noncoding DNA.** *Methods Mol Biol* 2012,  
48 874 **856**:141-159.
- 49 875 78. Bleiweiss R: **Ultraviolet plumage reflectance distinguishes sibling bird species.** *Proceedings of*  
50 876 *the National Academy of Sciences of the United States of America* 2004, **101**(47):16561.

- 877 79. Bajer K, Molnár O, Török J, Herczeg G: **Female European green lizards (*Lacerta viridis*) prefer males with high ultraviolet throat reflectance.** *Behavioral Ecology and Sociobiology* 2010, **64**(12):2007-2014.
- 1 878
- 2 879
- 3 880 80. Bajer K, Molnár O, Török J, Herczeg G: **Ultraviolet nuptial colour determines fight success in male European green lizards (*Lacerta viridis*).** *Biology Letters* 2011, **7**(6):866-868.
- 4 881
- 5 882 81. Averbek M, Gebhardt CA, Voigt S, Beilharz S, Anderegg U, Termeer CC, Sleeman JP, Simon JC: **Differential Regulation of Hyaluronan Metabolism in the Epidermal and Dermal Compartments of Human Skin by UVB Irradiation.** *Journal of Investigative Dermatology* 2007, **127**(3):687-697.
- 6 883
- 7 884
- 8 885
- 9 886 82. Kurdykowski S, Mine S, Bardey V, Danoux L, Jeanmaire C, Pauly G, Brabencova E, Wegrowski Y, Maquart FX: **Ultraviolet-B irradiation induces differential regulations of hyaluronidase expression and activity in normal human keratinocytes.** *Photochem Photobiol* 2011, **87**(5):1105-1112.
- 10 887
- 11 888
- 12 889
- 13 890 83. Urrutia R: **KRAB-containing zinc-finger repressor proteins.** *Genome Biol* 2003, **4**.
- 14 891 84. Wolfe SA, Nekludova L, Pabo CO: **DNA recognition by Cys2His2 zinc finger proteins.** *Annu Rev Biophys Biomol Struct* 2000, **29**.
- 15 892
- 16 893 85. Englbrecht CC, Schoof H, Böhm S: **Conservation, diversification and expansion of C2H2 zinc finger proteins in the *Arabidopsis thaliana* genome.** *BMC Genomics* 2004, **5**(1):39.
- 17 894
- 18 895 86. Emerson RO, Thomas JH: **Adaptive evolution in zinc finger transcription factors.** *PLoS Genet* 2009, **5**(1):e1000325.
- 19 896
- 20 897 87. Nowick K, Fields C, Gernat T, Caetano-Anolles D, Kholina N, Stubbs L: **Gain, loss and divergence in primate zinc-finger genes: a rich resource for evolution of gene regulatory differences between species.** *PLoS One* 2011, **6**(6):e21553.
- 21 898
- 22 899
- 23 900 88. Rieseberg LH: **Chromosomal rearrangements and speciation.** *Trends in Ecology & Evolution* 2001, **16**(7):351-358.
- 24 901
- 25 902 89. Kirkpatrick M, Barton N: **Chromosome inversions, local adaptation and speciation.** *Genetics* 2006, **173**(1):419-434.
- 26 903
- 27 904 90. Böhme MU, Schneeweiß N, Fritz U, Schlegel M, Berendonk TU: **Small edge populations at risk: genetic diversity of the green lizard (*Lacerta viridis viridis*) in Germany and implications for conservation management.** *Conservation Genetics* 2007, **8**(3):555-563.
- 28 905
- 29 906 91. Joger U, Fritz U, Guicking D, Kalyabina-Hauf S, Nagy ZT, Wink M: **Phylogeography of western Palaearctic reptiles – Spatial and temporal speciation patterns.** *Zoologischer Anzeiger - A Journal of Comparative Zoology* 2007, **246**(4):293-313.
- 30 907
- 31 908
- 32 909 92. Weigert A, Helm C, Meyer M, Nickel B, Arendt D, Hausdorf B, Santos SR, Halanych KM, Purschke G, Bleidorn C *et al*: **Illuminating the base of the annelid tree using transcriptomics.** *Mol Biol Evol* 2014, **31**(6):1391-1401.
- 33 910
- 34 911
- 35 912 93. Kircher M, Sawyer S, Meyer M: **Double indexing overcomes inaccuracies in multiplex sequencing on the Illumina platform.** *Nucleic Acids Res* 2012, **40**(1):e3.
- 36 913
- 37 914 94. Meyer M, Kircher M: **Illumina sequencing library preparation for highly multiplexed target capture and sequencing.** *Cold Spring Harb Protoc* 2010, **2010**(6):pdb prot5448.
- 38 915
- 39 916 95. Nawrocki EP, Eddy SR: **Infernal 1.1: 100-fold faster RNA homology searches.** *Bioinformatics* 2013, **29**(22):2933-2935.
- 40 917
- 41 918 96. Nawrocki EP, Burge SW, Bateman A, Daub J, Eberhardt RY, Eddy SR, Floden EW, Gardner PP, Jones TA, Tate J *et al*: **Rfam 12.0: updates to the RNA families database.** *Nucleic Acids Res* 2015, **43**(Database issue):D130-137.
- 42 919
- 43 920
- 44 921 97. Lowe TM, Eddy SR: **tRNAscan-SE: a program for improved detection of transfer RNA genes in genomic sequence.** *Nucleic Acids Res* 1997, **25**.
- 45 922
- 46 923 98. Bartschat S, Kehr S, Tafer H, Stadler PF, Hertel J: **snoStrip: a snoRNA annotation pipeline.** *Bioinformatics* 2014, **30**(1):115-116.
- 47 924
- 48 925 99. Jorjani H, Kehr S, Jedlinski DJ, Gumienny R, Hertel J, Stadler PF, Zavolan M, Gruber AR: **An updated human snoRNAome.** *Nucleic Acids Res* 2016, **44**(11):5068-5082.
- 49 926
- 50 927
- 51 928
- 52 929
- 53 930
- 54 931
- 55 932
- 56 933
- 57 934
- 58 935
- 59 936
- 60 937
- 61 938
- 62 939
- 63 940
- 64 941
- 65 942

- 928 100. Taft RJ, Glazov EA, Lassmann T, Hayashizaki Y, Carninci P, Mattick JS: **Small RNAs derived from snoRNAs**. *RNA* 2009, **15**(7):1233-1240.
- 1 929
- 2 930 101. Haas BJ, Papanicolaou A, Yassour M, Grabherr M, Blood PD, Bowden J, Couger MB, Eccles D, Li B, Lieber M *et al*: **De novo transcript sequence reconstruction from RNA-Seq: reference generation and analysis with Trinity**. *Nature protocols* 2013, **8**(8):10.1038/nprot.2013.1084.
- 3 931
- 4 932
- 5 933 102. Hertel J, Stadler PF: **The Expansion of Animal MicroRNA Families Revisited**. *Life (Basel)* 2015, **5**(1):905-920.
- 6 934
- 7 935 103. Smit A, Hubley R: **RepeatModeler Open-1.0**. 2008-2015.
- 8 936 104. Smit A, Hubley R, Green P: **RepeatMasker Open-4.0**. 2013-2015.
- 9 937 105. Li H: **Aligning sequence reads, clone sequences and assembly contigs with BWA-MEM**. *arXiv:13033997* 2013.
- 10 938
- 11 939 106. Garrison E, Marth G: **Haplotype-based variant detection from short-read sequencing**. *arXiv preprint* 2012, **arXiv:1207.3907** ([q-bio.GN]\*).
- 12 940
- 13 941 107. Lohse K, Harrison RJ, Barton NH: **A general method for calculating likelihoods under the coalescent process**. *Genetics* 2011, **189**(3):977-987.
- 14 942
- 15 943 108. Nurnberger B, Lohse K, Fijarczyk A, Szymura JM, Blaxter ML: **Para-allopatry in hybridizing fire-bellied toads (*Bombina bombina* and *B. variegata*): Inference from transcriptome-wide coalescence analyses**. *Evolution* 2016, **70**(8):1803-1818.
- 16 944
- 17 945
- 18 946 109. Caughley G: **Parameters for Seasonally Breeding Populations**. *Ecology* 1967, **48**(5):834-839.
- 19 947 110. Elbing K: **Zur Wiederbesiedlung brandgeschädigter Teilhabitats durch Smaragdeidechsen (*Lacerta viridis*)**. *Salamandra* 2000, **36**(3):175-184.
- 20 948
- 21 949 111. Saint Girons H, Castanet J, Bradshaw D, Baron J-P: **Démographie comparée de deux populations françaises de *Lacerta viridis* (Laurenti, 1768)**. *Journal of Ecology* 1989, **44**(4):361-386.
- 22 950
- 23 951
- 24 952 112. Rykena S, Nettmann HK: ***Lacerta viridis* (Laurenti, 1768) – Smaragdeidechse**, vol. 2; 1984.
- 25 953 113. Tollis M, Ausubel G, Ghimire D, Boissinot S: **Multi-Locus Phylogeographic and Population Genetic Analysis of *Anolis carolinensis*: Historical Demography of a Genomic Model Species**. *PLoS One* 2012, **7**(6):e38474.
- 26 954
- 27 955 114. Mohiyuddin M, Mu JC, Li J, Bani Asadi N, Gerstein MB, Abyzov A, Wong WH, Lam HY: **MetaSV: an accurate and integrative structural-variant caller for next generation sequencing**. *Bioinformatics* 2015, **31**(16):2741-2744.
- 28 956
- 29 957
- 30 958 115. Chen K, Wallis JW, McLellan MD, Larson DE, Kalicki JM, Pohl CS, McGrath SD, Wendl MC, Zhang Q, Locke DP *et al*: **BreakDancer: an algorithm for high-resolution mapping of genomic structural variation**. *Nat Methods* 2009, **6**(9):677-681.
- 31 959
- 32 960
- 33 961 116. Abyzov A, Urban AE, Snyder M, Gerstein M: **CNVnator: an approach to discover, genotype, and characterize typical and atypical CNVs from family and population genome sequencing**. *Genome Res* 2011, **21**(6):974-984.
- 34 962
- 35 963
- 36 964 117. Ye K, Schulz MH, Long Q, Apweiler R, Ning Z: **Pindel: a pattern growth approach to detect break points of large deletions and medium sized insertions from paired-end short reads**. *Bioinformatics* 2009, **25**(21):2865-2871.
- 37 965
- 38 966 118. Xie C, Tammi MT: **CNV-seq, a new method to detect copy number variation using high-throughput sequencing**. *BMC Bioinformatics* 2009, **10**:80-80.
- 39 967
- 40 968 119. Kent WJ, Baertsch R, Hinrichs A, Miller W, Haussler D: **Evolution's cauldron: duplication, deletion, and rearrangement in the mouse and human genomes**. *Proc Natl Acad Sci U S A* 2003, **100**(20):11484-11489.
- 41 969
- 42 970
- 43 971 120. Blanchette M, Kent WJ, Riemer C, Elnitski L, Smit AF, Roskin KM, Baertsch R, Rosenbloom K, Clawson H, Green ED *et al*: **Aligning multiple genomic sequences with the threaded blockset aligner**. *Genome Res* 2004, **14**(4):708-715.
- 44 972
- 45 973 121. Hickey G, Paten B, Earl D, Zerbino D, Haussler D: **HAL: a hierarchical format for storing and analyzing multiple genome alignments**. *Bioinformatics* 2013, **29**(10):1341-1342.
- 46 974
- 47 975 122. Harris R: **Improved pairwise alignment of genomic DNA**. *Ph.D. Thesis*. The Pennsylvania State University.; 2007.
- 48 976
- 49 977
- 50 978
- 51 979
- 52 980
- 53 981
- 54 982
- 55 983
- 56 984
- 57 985
- 58 986
- 59 987
- 60 988
- 61 989
- 62 990
- 63 991
- 64 992
- 65 993



- 980 123. Walter Costa MB, Höner zu Siederdisen C, Stadler PF, Nowick K: **SSS-test: a novel test for**  
 1 981 **detecting selection on the secondary structures of non-coding RNAs. (submitted).** *Nucleic*  
 2 982 *Acids Res* 2017.
- 3 983 124. Lorenz R, Bernhart SH, Höner zu Siederdisen C, Tafer H, Flamm C, Stadler PF, Hofacker IL:  
 4 984 **ViennaRNA Package 2.0.** *Algorithms for Molecular Biology* 2011, **6**(1):26.
- 5 985 125. Lange SJ, Maticzka D, Mohl M, Gagnon JN, Brown CM, Backofen R: **Global or local? Predicting**  
 6 986 **secondary structure and accessibility in mRNAs.** *Nucleic Acids Res* 2012, **40**(12):5215-5226.
- 7 987 126. Yates A, Akanni W, Amode MR, Barrell D, Billis K, Carvalho-Silva D, Cummins C, Clapham P,  
 8 988 Fitzgerald S, Gil L *et al*: **Ensembl 2016.** *Nucleic Acids Res* 2016, **44**(D1):D710-716.
- 9 989 127. Hongo JA, de Castro GM, Cintra LC, Zerlotini A, Lobo FP: **POTION: an end-to-end pipeline for**  
 10 990 **positive Darwinian selection detection in genome-scale data through phylogenetic**  
 11 991 **comparison of protein-coding genes.** *BMC Genomics* 2015, **16**:567.
- 12 992 128. Yang Z: **PAML 4: phylogenetic analysis by maximum likelihood.** *Mol Biol Evol* 2007,  
 13 993 **24**(8):1586-1591.

14 994  
 15 995  
 16  
 17 996  
 18  
 19 997  
 20  
 21  
 22 998  
 23  
 24  
 25  
 26 999  
 27  
 28  
 29  
 30 1000  
 31  
 32

## 33 999 **Figure Legends**

34  
 35  
 36  
 37 1000 Figure 1. Thirteen different demographic scenarios were fitted. The models M1.1, M2.1 and  
 38  
 39  
 40 1001 M3.1 are strict divergence without gene flow; M1.2, M2.2 and M3.2 allow for post-divergence  
 41  
 42 1002 gene flow from *L. viridis* to *L. bilineata*; M1.3, M2.3 and M3.3 assume gene flow in the reverse  
 43  
 44  
 45 1003 direction i.e. (from *L. bilineata* to *L. viridis*). The models M4.2 and M5.2 allow for discrete  
 46  
 47 1004 admixture from *L. viridis* to *L. bilineata* and models M4.3 and M5.3 assume the admixture in  
 48  
 49  
 50 1005 the reverse direction (from *L. bilineata* to *L. viridis*). The effective population size is either  
 51  
 52 1006 assumed to be identical between both species and their ancestor (class M1.\*) or one of the  
 53  
 54 1007 species has a different effective population size compared to the other species and ancestor  
 55  
 56  
 57 1008 (classes M2.\*-5.\*).

58  
 59  
 60 1009  
 61  
 62  
 63  
 64  
 65

1010 Figure 2. Total counts and length ranges (in bp) of genomic rearrangements of SVs between L.  
 1 viridis and L. bilineata. The counts are represented by bars and length ranges by whiskers (y-  
 2 1011 axis is log10-scaled). The rearrangements plotted are categorized into deletions (DEL),  
 3  
 4 1012 duplications (DUP), insertions (INS) and inversions (INV).  
 5  
 6  
 7 1013  
 8  
 9

10 1014  
 11  
 12  
 13  
 14 1015 Figure 3. The folded blockwise site frequency spectrum (bSFS). The variation in alleles  
 15 represented by different colours (the ancestral state showed in red). Given a single genealogy  
 16 1016 (a diploid genome from two populations can form six possible genealogies), each block contains  
 17  
 18 1017 four mutation types: i) unique heterozygous sites in L. bilineata, ii) unique heterozygous sites  
 19 1018 in L. viridis, iii) shared heterozygous sites between L. viridis and L. bilineata or iv) homozygous  
 20  
 21 1019 sites which are different between L. viridis and L. bilineata i.e. homozygous fixed differences.  
 22  
 23 1020 The bSFS (spectrum of SFS) has been calculated by counting the number of occurrences of  
 24  
 25 1021 each SFS.  
 26  
 27  
 28  
 29 1022  
 30  
 31  
 32  
 33  
 34  
 35 1023  
 36  
 37

38 1024 **Tables**  
 39  
 40

41 1025 Table 1. The  $\Delta AIC$  of the best model (i.e IM 2 B(x) $\rightarrow$ V ) compared to the other scenarios. To lower the  
 42  
 43 1026 effect of linkage between blocks we adjusted the AIC values of each model by only sampling every  
 44  
 45 1027 1000 blocks. The best model is highlighted in bold. Note: ADM - Isolation with discreet admixture; IM  
 46  
 47 1028 - Isolation with migration and DIV - Strict divergence without gene flow.  
 48  
 49  
 50

| Model ID    | Model type                                | $\Delta AIC$ |
|-------------|-------------------------------------------|--------------|
| <b>M5.3</b> | <b>ADM 2B(x)<math>\rightarrow</math>V</b> | <b>-47.2</b> |
| M3.2        | ADM 2V (x) $\rightarrow$ B                | -141         |
| M4.3        | ADM 2B $\rightarrow$ V (x)                | -47.2        |
| M3.2        | ADM 2V $\rightarrow$ B(x)                 | -141         |

1  
2  
3  
4  
5  
6  
7  
8  
9  
10  
11  
12  
13  
14  
15  
16  
17  
18  
19  
20  
21  
22  
23  
24  
25  
26  
27  
28  
29  
30  
31  
32  
33  
34  
35  
36  
37  
38  
39  
40  
41  
42  
43  
44  
45  
46  
47  
48  
49  
50  
51  
52  
53  
54  
55  
56  
57  
58  
59  
60  
61  
62  
63  
64  
65

|             |                       |          |
|-------------|-----------------------|----------|
| <b>M3.3</b> | <b>IM 2B(x)-&gt;V</b> | <b>0</b> |
| M3.2        | IM 2V(x)->B           | -77.9    |
| M3.1        | DIV 2 b               | -1380    |
| M2.3        | IM 2B->V (x)          | -32.9    |
| M2.2        | IM 2V ->B(x)          | -86.5    |
| M2.1        | DIV 2                 | -1140    |
| M1.3        | IM 1B->V              | -487     |
| M1.2        | IM 1V ->B             | -128     |
| M1.1        | DIV 1                 | -1380    |

1029



Click here to access/download  
**Supplementary Material**  
Figure\_1.svg



Click here to access/download  
**Supplementary Material**  
Figure\_2.svg



Click here to access/download  
**Supplementary Material**  
Figure\_3.svg



Click here to access/download  
**Supplementary Material**  
Lacertids\_Manuscript-  
Gigascience\_Supplement\_FINAL.pdf

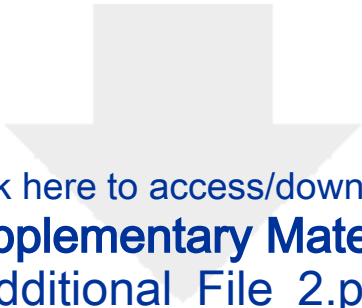

Click here to access/download  
**Supplementary Material**  
Additional\_File\_2.pdf





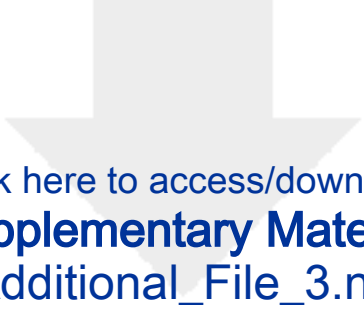

Click here to access/download  
**Supplementary Material**  
Additional\_File\_3.nb



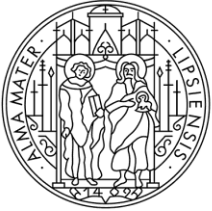

# UNIVERSITÄT LEIPZIG

Universität Leipzig, Institut für Biologie, Talstraße 33, 04103 Leipzig

Fakultät für  
Lebenswissenschaften  
Institut für Biologie  
**Molekulare Evolution und  
Systematik der Tiere**  
Prof. Dr. Martin Schlegel  
**17. May 2018**

Dear *Dr. Scott Edmunds*,

We enclose our manuscript “*Divergent evolution in the genomes of closely-related lacertids, Lacerta viridis and L. bilineata and implications for speciation*” for your consideration.

Lizards are valuable resources to study evolution in higher vertebrates due to their well-known phylogeographies and adaptive radiation. The phylogeography of the European green lizards (*Lacerta viridis* complex) in particular has been studied since three decades through ecological experiments and molecular markers. The *L. viridis* complex was recently delineated into two separate species, *L. viridis* and *L. bilineata*, owing to the reproductive barriers between their progeny. However, factors contributing to their divergence are unknown and their species status is still debatable due to the absence of morphological variation.

We present the genomes of *L. viridis* and *L. bilineata*, the first in *Lacertidae* family through *de novo* assemblies using Illumina and PacBio sequencing technologies. Transcriptomic data of multiple tissues from the same individuals were used for annotation and detecting signs of selection. We conducted genome-wide analyses mainly involving genomic variation, rearrangements, changes in non-coding elements and species-specific adaptations. We implemented the blockwise site frequency spectrum to study lacertid demographic histories and estimated their split around 2.7-3.05 Mya with gene flow in the direction from *L. viridis* to *L. bilineata*.

We found adaptation of cutaneous UV-B responsive genes as major drivers of preferential mating in lacertids. Species specific diversification of the non-coding repertoire; transcription factors divergence; adaptation of genes related to behavior, neuronal and reproductive development; association of positively selected genes with inversions as contributors to reproductive isolation. We provide first insights into the genomes and population histories of European green lizards pivotal for their conservation as well as important resources for future work on speciation.

We hope that you agree that our manuscript is of interest to the broad readership of *Gigascience* since it overlaps with multiple themes of your esteemed journal including comparative genomics, evolution and ecology.

All the authors declare no competing interests and approve the manuscript for submission. We confirm that the content has not been published or submitted elsewhere. We look forward to hearing from you.

With best regards,  
*Rohit Kolara, Peter F Stadler and Martin Schlegel*

**Universität Leipzig**  
Fakultät für Lebenswissenschaften  
Institut für Biologie  
Molekulare Evolution und Systematik  
der Tiere  
Talstraße 33  
04103 Leipzig

**Telefon**  
+49 341 97-36725

**Fax**  
+49 341 97-36789

**E-Mail**  
schlegel@rz.uni-leipzig.de

**Web**  
<http://home.uni-leipzig.de/agspzoo/>

**Postfach intern**  
220001

Kein Zugang für elektronisch  
signierte sowie für verschlüsselte  
elektronische Dokumente
