# Supplementary material for: Divergent evolution in the genomes of closely related lacertids, Lacerta viridis and L. bilineata, and implications for speciation
Source: PubMed Central journal article supplement (PMC6381762; doi:10.1093/gigascience/giy160), 2018-12-10
Supplement: giy160_giga-d-18-00173_revision_2.pdf [file giy160_giga-d-18-00173_revision_2.pdf]

## Divergent evolution in the genomes of closely-related lacertids, *Lacerta viridis* and *L. bilineata* and implications for speciation

--Manuscript Draft--

|                                                      |                                                                                                                                                                                                                                                                                                                                                                                                                                                                                                                                                                                                                                                                                                                                                                                                                                                                                                                                                                                                                                                                                                                                                                                                                                                                                                                                                                                                                                                                                                                                                                                                                                                                                                                                                                                                                                                                                                                                                                                                                                                                                                                                                              |                     |
|------------------------------------------------------|--------------------------------------------------------------------------------------------------------------------------------------------------------------------------------------------------------------------------------------------------------------------------------------------------------------------------------------------------------------------------------------------------------------------------------------------------------------------------------------------------------------------------------------------------------------------------------------------------------------------------------------------------------------------------------------------------------------------------------------------------------------------------------------------------------------------------------------------------------------------------------------------------------------------------------------------------------------------------------------------------------------------------------------------------------------------------------------------------------------------------------------------------------------------------------------------------------------------------------------------------------------------------------------------------------------------------------------------------------------------------------------------------------------------------------------------------------------------------------------------------------------------------------------------------------------------------------------------------------------------------------------------------------------------------------------------------------------------------------------------------------------------------------------------------------------------------------------------------------------------------------------------------------------------------------------------------------------------------------------------------------------------------------------------------------------------------------------------------------------------------------------------------------------|---------------------|
| <b>Manuscript Number:</b>                            | GIGA-D-18-00173R2                                                                                                                                                                                                                                                                                                                                                                                                                                                                                                                                                                                                                                                                                                                                                                                                                                                                                                                                                                                                                                                                                                                                                                                                                                                                                                                                                                                                                                                                                                                                                                                                                                                                                                                                                                                                                                                                                                                                                                                                                                                                                                                                            |                     |
| <b>Full Title:</b>                                   | Divergent evolution in the genomes of closely-related lacertids, <i>Lacerta viridis</i> and <i>L. bilineata</i> and implications for speciation                                                                                                                                                                                                                                                                                                                                                                                                                                                                                                                                                                                                                                                                                                                                                                                                                                                                                                                                                                                                                                                                                                                                                                                                                                                                                                                                                                                                                                                                                                                                                                                                                                                                                                                                                                                                                                                                                                                                                                                                              |                     |
| <b>Article Type:</b>                                 | Research                                                                                                                                                                                                                                                                                                                                                                                                                                                                                                                                                                                                                                                                                                                                                                                                                                                                                                                                                                                                                                                                                                                                                                                                                                                                                                                                                                                                                                                                                                                                                                                                                                                                                                                                                                                                                                                                                                                                                                                                                                                                                                                                                     |                     |
| <b>Funding Information:</b>                          | Deutsche Forschungsgemeinschaft (FZT118)                                                                                                                                                                                                                                                                                                                                                                                                                                                                                                                                                                                                                                                                                                                                                                                                                                                                                                                                                                                                                                                                                                                                                                                                                                                                                                                                                                                                                                                                                                                                                                                                                                                                                                                                                                                                                                                                                                                                                                                                                                                                                                                     | Dr. Martin Schlegel |
| <b>Abstract:</b>                                     | <p>Background: <i>Lacerta viridis</i> and <i>L. bilineata</i> are sister species of European green lizards (eastern and western clades respectively), which until recently were grouped together as the <i>L. viridis</i> complex. Genetic incompatibilities were observed between lacertid populations through crossing experiments, which led to the delineation of two separate species within the <i>L. viridis</i> complex. The population history of these sister species and processes driving divergence are unknown. We constructed high quality de novo genome assemblies for both <i>L. viridis</i> and <i>L. bilineata</i> through Illumina and PacBio sequencing, with annotation support provided from transcriptome sequencing of several tissues. To estimate gene flow between the two species and identify factors involved in reproductive isolation, we studied their evolutionary history, identified genomic rearrangements, detected signature of selection on non-coding RNA and protein-coding genes.</p> <p>Findings: Here we show that the gene flow was primarily unidirectional from <i>L. bilineata</i> to <i>L. viridis</i> after their split at least 1.15 Mya. We detected positive selection of the non-coding repertoire; mutations in transcription factors; accumulation of divergence through inversions; selection on genes involved in neural development, reproduction and behavior, as well as in UV-response possibly driven by sexual selection, whose contribution to reproductive isolation between these lacertid species need to be further evaluated.</p> <p>Conclusion: The combination of short and long sequence reads resulted in one of the most complete lizard genome assemblies. The characterization of a diverse array of genomic features provided valuable insights into the demographic history of divergence among European green lizards, as well as key species differences, some of which are candidates that could have played a role in speciation. In addition, our study generated valuable genomic resources that can be used to address conservation related issue in lacertids.</p> |                     |
| <b>Corresponding Author:</b>                         | Sree Rohit Raj Kolora<br><br>GERMANY                                                                                                                                                                                                                                                                                                                                                                                                                                                                                                                                                                                                                                                                                                                                                                                                                                                                                                                                                                                                                                                                                                                                                                                                                                                                                                                                                                                                                                                                                                                                                                                                                                                                                                                                                                                                                                                                                                                                                                                                                                                                                                                         |                     |
| <b>Corresponding Author Secondary Information:</b>   |                                                                                                                                                                                                                                                                                                                                                                                                                                                                                                                                                                                                                                                                                                                                                                                                                                                                                                                                                                                                                                                                                                                                                                                                                                                                                                                                                                                                                                                                                                                                                                                                                                                                                                                                                                                                                                                                                                                                                                                                                                                                                                                                                              |                     |
| <b>Corresponding Author's Institution:</b>           |                                                                                                                                                                                                                                                                                                                                                                                                                                                                                                                                                                                                                                                                                                                                                                                                                                                                                                                                                                                                                                                                                                                                                                                                                                                                                                                                                                                                                                                                                                                                                                                                                                                                                                                                                                                                                                                                                                                                                                                                                                                                                                                                                              |                     |
| <b>Corresponding Author's Secondary Institution:</b> |                                                                                                                                                                                                                                                                                                                                                                                                                                                                                                                                                                                                                                                                                                                                                                                                                                                                                                                                                                                                                                                                                                                                                                                                                                                                                                                                                                                                                                                                                                                                                                                                                                                                                                                                                                                                                                                                                                                                                                                                                                                                                                                                                              |                     |
| <b>First Author:</b>                                 | Sree Rohit Raj Kolora                                                                                                                                                                                                                                                                                                                                                                                                                                                                                                                                                                                                                                                                                                                                                                                                                                                                                                                                                                                                                                                                                                                                                                                                                                                                                                                                                                                                                                                                                                                                                                                                                                                                                                                                                                                                                                                                                                                                                                                                                                                                                                                                        |                     |
| <b>First Author Secondary Information:</b>           |                                                                                                                                                                                                                                                                                                                                                                                                                                                                                                                                                                                                                                                                                                                                                                                                                                                                                                                                                                                                                                                                                                                                                                                                                                                                                                                                                                                                                                                                                                                                                                                                                                                                                                                                                                                                                                                                                                                                                                                                                                                                                                                                                              |                     |
| <b>Order of Authors:</b>                             | Sree Rohit Raj Kolora<br>Anne Weigert<br>Amin Saffari<br>Stephanie Kehr<br>Maria Beatriz Walter Costa<br>Cathrin Spröer<br>Henrike Indrischek                                                                                                                                                                                                                                                                                                                                                                                                                                                                                                                                                                                                                                                                                                                                                                                                                                                                                                                                                                                                                                                                                                                                                                                                                                                                                                                                                                                                                                                                                                                                                                                                                                                                                                                                                                                                                                                                                                                                                                                                                |                     |

|                                                                               |                                                                                                                                                                                                                                                                                                                                                                                                                                                                                                                                                                                                                                                                                                                                                                                                                                                                                                                                                                                                                                                                                                                                                                                                                                                                                                                                                                                                                                                                                                                                                                                                              |
|-------------------------------------------------------------------------------|--------------------------------------------------------------------------------------------------------------------------------------------------------------------------------------------------------------------------------------------------------------------------------------------------------------------------------------------------------------------------------------------------------------------------------------------------------------------------------------------------------------------------------------------------------------------------------------------------------------------------------------------------------------------------------------------------------------------------------------------------------------------------------------------------------------------------------------------------------------------------------------------------------------------------------------------------------------------------------------------------------------------------------------------------------------------------------------------------------------------------------------------------------------------------------------------------------------------------------------------------------------------------------------------------------------------------------------------------------------------------------------------------------------------------------------------------------------------------------------------------------------------------------------------------------------------------------------------------------------|
|                                                                               | Manjusha Chintalapati                                                                                                                                                                                                                                                                                                                                                                                                                                                                                                                                                                                                                                                                                                                                                                                                                                                                                                                                                                                                                                                                                                                                                                                                                                                                                                                                                                                                                                                                                                                                                                                        |
|                                                                               | Konrad Lohse                                                                                                                                                                                                                                                                                                                                                                                                                                                                                                                                                                                                                                                                                                                                                                                                                                                                                                                                                                                                                                                                                                                                                                                                                                                                                                                                                                                                                                                                                                                                                                                                 |
|                                                                               | Gero Doose                                                                                                                                                                                                                                                                                                                                                                                                                                                                                                                                                                                                                                                                                                                                                                                                                                                                                                                                                                                                                                                                                                                                                                                                                                                                                                                                                                                                                                                                                                                                                                                                   |
|                                                                               | Jörg Overmann                                                                                                                                                                                                                                                                                                                                                                                                                                                                                                                                                                                                                                                                                                                                                                                                                                                                                                                                                                                                                                                                                                                                                                                                                                                                                                                                                                                                                                                                                                                                                                                                |
|                                                                               | Boyke Bunk                                                                                                                                                                                                                                                                                                                                                                                                                                                                                                                                                                                                                                                                                                                                                                                                                                                                                                                                                                                                                                                                                                                                                                                                                                                                                                                                                                                                                                                                                                                                                                                                   |
|                                                                               | Christoph Bleidorn                                                                                                                                                                                                                                                                                                                                                                                                                                                                                                                                                                                                                                                                                                                                                                                                                                                                                                                                                                                                                                                                                                                                                                                                                                                                                                                                                                                                                                                                                                                                                                                           |
|                                                                               | Annegret Grimm-Seyfarth                                                                                                                                                                                                                                                                                                                                                                                                                                                                                                                                                                                                                                                                                                                                                                                                                                                                                                                                                                                                                                                                                                                                                                                                                                                                                                                                                                                                                                                                                                                                                                                      |
|                                                                               | Klaus Henle                                                                                                                                                                                                                                                                                                                                                                                                                                                                                                                                                                                                                                                                                                                                                                                                                                                                                                                                                                                                                                                                                                                                                                                                                                                                                                                                                                                                                                                                                                                                                                                                  |
|                                                                               | Katja Nowick                                                                                                                                                                                                                                                                                                                                                                                                                                                                                                                                                                                                                                                                                                                                                                                                                                                                                                                                                                                                                                                                                                                                                                                                                                                                                                                                                                                                                                                                                                                                                                                                 |
|                                                                               | Rui Faria                                                                                                                                                                                                                                                                                                                                                                                                                                                                                                                                                                                                                                                                                                                                                                                                                                                                                                                                                                                                                                                                                                                                                                                                                                                                                                                                                                                                                                                                                                                                                                                                    |
|                                                                               | Peter F Stadler                                                                                                                                                                                                                                                                                                                                                                                                                                                                                                                                                                                                                                                                                                                                                                                                                                                                                                                                                                                                                                                                                                                                                                                                                                                                                                                                                                                                                                                                                                                                                                                              |
|                                                                               | Martin Schlegel                                                                                                                                                                                                                                                                                                                                                                                                                                                                                                                                                                                                                                                                                                                                                                                                                                                                                                                                                                                                                                                                                                                                                                                                                                                                                                                                                                                                                                                                                                                                                                                              |
| <b>Order of Authors Secondary Information:</b>                                |                                                                                                                                                                                                                                                                                                                                                                                                                                                                                                                                                                                                                                                                                                                                                                                                                                                                                                                                                                                                                                                                                                                                                                                                                                                                                                                                                                                                                                                                                                                                                                                                              |
| <b>Response to Reviewers:</b>                                                 | <p>Dear Dr. Scott Edmunds, Executive Editor of GigaScience:</p> <p>We would like to resubmit the revised manuscript entitled "Divergent evolution in the genomes of closely-related lacertids, <i>Lacerta viridis</i> and <i>L. bilineata</i> and implications for speciation", previously submitted to GigaScience (GIGA-D-18-00173). We believe that all the comments and suggestions have been addressed and the current version meets the high quality of research published in GigaScience.</p> <p>Sincerely,<br/>Sree Rohit Raj Kolora, on behalf of all authors</p> <p>Line 140: "since" seems out of place in the sentence<br/>This has been corrected</p> <p>Line 221: "our estimate of the split between <i>L. viridis</i> and <i>L. bilineata</i> corresponds to 1.15 Mya and 20.37 Mya respectively (Table S8)." Add comma before respectively<br/>The comma has been added</p> <p>Line 413: "Animals were captures" should be "Animals were captured"<br/>This has been corrected</p> <p>A. Please change the Data Access section to an Availability of Supporting Data Section, and in this please cite the GigaDB and Zenodo DOIs in the references.<br/>The section has been modified and the databases have been cited</p> <p>B. Please add relevant identifiers into the paper such as NCBI taxon IDs, ORCID IDs for the authors and RRDs for software tools.<br/>The relevant IDs have been added to the best of our knowledge</p> <p>C. Please add an Abbreviations section at the end of the paper to include relevant abbreviations.<br/>A section of abbreviations has been added</p> |
| <b>Additional Information:</b>                                                |                                                                                                                                                                                                                                                                                                                                                                                                                                                                                                                                                                                                                                                                                                                                                                                                                                                                                                                                                                                                                                                                                                                                                                                                                                                                                                                                                                                                                                                                                                                                                                                                              |
| <b>Question</b>                                                               | <b>Response</b>                                                                                                                                                                                                                                                                                                                                                                                                                                                                                                                                                                                                                                                                                                                                                                                                                                                                                                                                                                                                                                                                                                                                                                                                                                                                                                                                                                                                                                                                                                                                                                                              |
| Are you submitting this manuscript to a special series or article collection? | No                                                                                                                                                                                                                                                                                                                                                                                                                                                                                                                                                                                                                                                                                                                                                                                                                                                                                                                                                                                                                                                                                                                                                                                                                                                                                                                                                                                                                                                                                                                                                                                                           |
| <b>Experimental design and statistics</b>                                     | Yes                                                                                                                                                                                                                                                                                                                                                                                                                                                                                                                                                                                                                                                                                                                                                                                                                                                                                                                                                                                                                                                                                                                                                                                                                                                                                                                                                                                                                                                                                                                                                                                                          |
| Full details of the experimental design and                                   |                                                                                                                                                                                                                                                                                                                                                                                                                                                                                                                                                                                                                                                                                                                                                                                                                                                                                                                                                                                                                                                                                                                                                                                                                                                                                                                                                                                                                                                                                                                                                                                                              |

|                                                                                                                                                                                                                                                                                                                                                                                                                                                                                                                                                         |            |
|---------------------------------------------------------------------------------------------------------------------------------------------------------------------------------------------------------------------------------------------------------------------------------------------------------------------------------------------------------------------------------------------------------------------------------------------------------------------------------------------------------------------------------------------------------|------------|
| <p>statistical methods used should be given in the Methods section, as detailed in our <a href="#">Minimum Standards Reporting Checklist</a>. Information essential to interpreting the data presented should be made available in the figure legends.</p> <p>Have you included all the information requested in your manuscript?</p>                                                                                                                                                                                                                   |            |
| <p><b>Resources</b></p> <p>A description of all resources used, including antibodies, cell lines, animals and software tools, with enough information to allow them to be uniquely identified, should be included in the Methods section. Authors are strongly encouraged to cite <a href="#">Research Resource Identifiers</a> (RRIDs) for antibodies, model organisms and tools, where possible.</p> <p>Have you included the information requested as detailed in our <a href="#">Minimum Standards Reporting Checklist</a>?</p>                     | <p>Yes</p> |
| <p><b>Availability of data and materials</b></p> <p>All datasets and code on which the conclusions of the paper rely must be either included in your submission or deposited in <a href="#">publicly available repositories</a> (where available and ethically appropriate), referencing such data using a unique identifier in the references and in the “Availability of Data and Materials” section of your manuscript.</p> <p>Have you have met the above requirement as detailed in our <a href="#">Minimum Standards Reporting Checklist</a>?</p> | <p>Yes</p> |

[Click here to view linked References](#)

# 1 **Divergent evolution in the genomes of closely-related lacertids, *Lacerta***

## 2 ***viridis* and *L. bilineata* and implications for speciation**

3 Sree Rohit Raj Kolora, Anne Weigert<sup>‡</sup>, Amin Saffari<sup>‡</sup>, Stephanie Kehr, Maria Beatriz Walter

4 Costa, Cathrin Spröer, Henrike Indrischek, Manjusha Chintalapati, Konrad Lohse, Gero

5 Doose, Jörg Overmann, Boyke Bunk, Christoph Bleidorn, Annegret Grimm-Seyfarth, Klaus

6 Henle, Katja Nowick, Rui Faria, Peter F Stadler, Martin Schlegel

7 <sup>‡</sup> These authors contributed equally to this work.

8

### 9 **Abstract**

10 **Background:** *Lacerta viridis* and *L. bilineata* are sister species of European green lizards  
11 (eastern and western clades respectively), which until recently were grouped together as the *L.*  
12 *viridis* complex. Genetic incompatibilities were observed between lacertid populations through  
13 crossing experiments, which led to the delineation of two separate species within the *L. viridis*  
14 complex. The population history of these sister species and processes driving divergence are  
15 unknown. We constructed high quality *de novo* genome assemblies for both *L. viridis* and *L.*  
16 *bilineata* through Illumina and PacBio sequencing, with annotation support provided from  
17 transcriptome sequencing of several tissues. To estimate gene flow between the two species and  
18 identify factors involved in reproductive isolation, we studied their evolutionary history,  
19 identified genomic rearrangements, detected signature of selection on non-coding RNA and  
20 protein-coding genes.

21 **Findings:** Here we show that the gene flow was primarily unidirectional from *L. bilineata* to  
22 *L. viridis* after their split at least 1.15 Mya. We detected positive selection of the non-coding  
23 repertoire; mutations in transcription factors; accumulation of divergence through inversions;  
24 selection on genes involved in neural development, reproduction and behavior, as well as in

25 UV-response possibly driven by sexual selection, whose contribution to reproductive isolation  
26 between these lacertid species need to be further evaluated.

27 **Conclusion:** The combination of short and long sequence reads resulted in one of the most  
28 complete lizard genome assemblies. The characterization of a diverse array of genomic features  
29 provided valuable insights into the demographic history of divergence among European green  
30 lizards, as well as key species differences, some of which are candidates that could have played  
31 a role in speciation. In addition, our study generated valuable genomic resources that can be  
32 used to address conservation related issue in lacertids.

## 34 Introduction

35 Understanding what species are and the processes driving their emergence have been two  
36 central issues in biology [1]. During the last century, genes involved in reproductive isolation  
37 were mainly identified in model organisms, such as *Drosophila* [2]. These studies aiming at the  
38 so-called “speciation genes” revealed at least three general patterns: i) genes involved in post-  
39 zygotic incompatibilities show signatures of accelerated evolution [2]; ii) incompatibilities  
40 often involve a disproportionate number of genes located on sex chromosomes [3, 4] and iii)  
41 mis-expression is often observed in hybrids, suggesting that gene regulation is an important  
42 component of speciation [5-7]. However, the identification of incompatibilities using laborious  
43 lab crosses was only possible for model organisms, and thus the identification of loci involved  
44 in reproductive isolation [8] in natural populations remained largely unknown.

45 The advent of high throughput sequencing together with the development of novel approaches  
46 for whole genome analyses opened new research avenues to study the origin of species,  
47 including non-model organisms [9]. It has been shown that genes involved in adaptation and  
48 speciation are often found in regions of low recombination, such as genomic rearrangements,

49 suggesting that they play an important role in species diversification [10]. Several *in-silico* tools  
50 have been developed to detect structural variation with high precision using genomic data [11-  
51 13], thus enabling us to test evolutionary hypotheses such as the role of genomic rearrangements  
52 in speciation over a wider taxonomic range [14].

53 The assessment of divergence in regulatory elements and transcription factors between species  
54 further adds to a more complete understanding of the link between genotypes and phenotypes.  
55 In this respect, transcriptome sequencing offers an unprecedented resolution to investigate the  
56 general importance of divergence in gene regulation in speciation. In particular, zinc-finger  
57 genes, especially *Krüppel*-type zinc fingers (KZNFs), a family of transcription factors were  
58 pinpointed as strong candidates to play a role in the speciation of other vertebrates [6]. In  
59 addition, various epigenetic mechanisms between species mediated by non-coding RNA  
60 (ncRNA) can also contribute to speciation [15-18].

61 Nevertheless, our understanding of how speciation unfolds, as well as the mechanisms involved  
62 will remain limited without the knowledge of the demographic history between diverging taxa  
63 [8]. Model-based methods are now available to infer the demographic history of recently  
64 diverged taxa based on genome data from a few individuals of each species [19]. Thus, patterns  
65 of gene flow and population size changes during divergence can now be inferred without  
66 extensive sampling [20].

67 In summary, the identification of differences in genomic features between closely related  
68 species and their demographic history can now be assessed in a cost-effective manner. The  
69 resulting information is likely to provide insights about the main candidates playing a role in  
70 diversification, upon which more specific hypotheses concerning the mechanisms of divergence  
71 can be tested.

72 Lizards provide an excellent model for studying speciation due to the existing knowledge on  
73 their long-term demographics and adaptive morphologies, in addition to the ease of sample

74 collection and experimental manipulations [21]. Lizards of the genus *Anolis*, in particular, have  
75 been studied in detail, as their distribution on islands coupled with repeated adaptive radiations  
76 offer a perfect framework for evolutionary ecology studies [22]. Not surprisingly, the first  
77 sequenced squamate genome was an anole lizard [23]. Comparative genomic analysis of *Anolis*  
78 *carolinensis* (anole lizard) with the genomes of birds and mammals was pivotal in identifying  
79 accelerated evolution of egg proteins associated with amniote evolution [23]. Further sauropsid  
80 genomes (birds and reptiles) were sequenced in recent years, now covering a broader taxonomic  
81 range of Squamata, Archosauria and Chelonia [24-31]. For instance, the study of *Gekko*  
82 *japonicus* (gecko lizard) contributed to the understanding of evolution and adaptation of tail  
83 regeneration, clinging, nocturnal vision and diversification of the olfactory system [26]. In  
84 addition, the genomes of *Pogona vitticeps* (bearded dragon lizard) and *Shinisaurus*  
85 *crocodilurus* (Chinese crocodile lizard) have recently been characterized [24, 27]. However,  
86 comparative genome analyses of closely-related lizard species pairs have been limited to anoles,  
87 where adaptive evolution of genes related to brain development and behaviour was recently  
88 reported [32].

89 The family Lacertidae (Sauropsida, Squamata) has been well covered in-terms of  
90 phylogeographic studies, providing important information about the likely timing and  
91 geographic context of speciation [21]. Within this family, the *Lacerta viridis* complex shows  
92 an intricate evolutionary history with secondary contact zones [33, 34]. Here, we focus on the  
93 divergence between the western clade formally described as *Lacerta bilineata* (National Center  
94 for Biotechnology information [NCBI] Taxon ID: 95620) and the eastern clade of *Lacerta*  
95 *viridis* (NCBI Taxon ID: 65476) (corresponding to lineage B and lineage V respectively of  
96 Marzahn *et al.*) that currently occupy disjoint regions in Europe [34].

97 Adult individuals from the two taxa are very similar: throat colouration of hatchlings and early  
98 juveniles is the only described diagnostic trait so far [35]. Gene flow between these two species

99 was previously hypothesized in studies of allozyme variation [36, 37]. However, recent  
100 analyses based on mtDNA and one nuclear marker (fibint7) have cast doubt on the taxonomic  
101 classification of the individuals analyzed in those studies and did not provide conclusive  
102 evidence either for or against gene flow between *L. viridis* and *L. bilineata* [34].

103 Hybrids between different main lineages within the *L. viridis* complex (northern Italy and  
104 Hungary) exhibit reduced fitness under laboratory conditions [38]. This suggests that at least  
105 partial reproductive isolation between *L. viridis* and *L. bilineata* can exist in the wild due to  
106 genomic Bateson-Dobzhansky-Muller incompatibilities (BDMIs). Previous models have  
107 suggested that after a secondary contact, BDMIs can be maintained and further accumulate  
108 within genome rearrangements [39, 40], thus avoiding species fusion [41]. High karyotypic  
109 variability has been observed in reptiles [42], also within the *L. viridis* complex [43], raising  
110 the prospect that genomic rearrangements could also be involved in their diversification [44].  
111 Finally, lizard-specific KZNF genes have recently been predicted [45], making our focal pair  
112 of taxa an excellent case study of evolution in this class of genes and their role in speciation via  
113 changes in gene regulatory networks. Overall, the *L. viridis* complex comprises a very  
114 interesting system where different genomic components can be studied to elucidate the  
115 demographic history and possible processes involved in speciation.

116 Here, we combine short Illumina and long PacBio read sequencing approaches to construct high  
117 quality *de novo* genomes for both *L. bilineata* and *L. viridis*, with annotation support from  
118 transcriptomic data. We investigated the demographic history of divergence between the two  
119 lacertid taxa and performed a broad comparison of key genomic features providing important  
120 insights about their divergence that can be tested in future studies aiming to identify the  
121 mechanisms ultimately leading to speciation between this closely related species pair.

122



123

1

2

3

4

## 124 **Results**

5

6

7

### 125 **The genomes of *L. viridis* and *L. bilineata***

8

9

10

126 We employed a hybrid strategy of combining Illumina and PacBio sequencing data to produce

11

12

13

127 separate genome assemblies for the two lacertid species. Genome sequencing coverages of 34x

14

15

128 Illumina and 14x PacBio for *L. viridis*; and 37x Illumina and 11x PacBio for *L. bilineata* aided

16

17

18

129 in the construction of high quality genome assemblies (supplement SI-1; Figure S2, S3). The

19

20

130 genome assembly sizes were 1.44 Gbp and 1.42 Gbp for *L. viridis* and *L. bilineata* respectively.

21

22

23

131 The assembled lacertid genomes achieved better contiguity than the high coverage illumina-

24

25

132 only contigs of *G. japonicus* but lower than the chromosome level assembly of *A. carolinensis*

26

27

133 (368 kbp and 663 kbp for *L. bilineata* and *L. viridis* respectively versus 150 Mbp in *A.*

28

29

134 *carolinensis*) (Table S1). While the BUSCO (Benchmarking Universal Single-Copy Orthologs)

30

31

135 completeness in terms of single-copy ortholog (SCO) genes with vertebrate core gene set were

32

33

136 96% and 94% respectively, higher than in the available lizard genomes. Since the genome of *L.*

34

35

137 *viridis* had better contiguity than *L. bilineata* (higher N50 and lesser number of contigs), *L.*

36

37

138 *viridis* was used as the reference to predict genomic variants (structural variants (SVs) and

38

39

139 single nucleotide polymorphisms (SNPs) between the two taxa.

40

41

42

43

44

140 *Lacerta viridis* genome consisted of higher number of large segmental duplications (>5 kbp)

45

46

141 than *L. bilineata* (Figure S4). However, no significant differences were observed in segmental

47

48

142 duplications (>1 kbp) between the two lacertid genomes (F-test:  $p=0.35$  and Wilcoxon test:

49

50

143  $p=0.55$ ). Hence, the occurrence of lesser large segmental duplications in *L. bilineata* could be

51

52

144 a result of higher fragmentation in its genome assembly. Synteny information was used to create

53

54

145 unordered contig clusters (min. size of 1 Mbp covering one-third of the *L. viridis* genome)

55

56

146 which roughly represent positioning on the same chromosome (Suppl. File S2). The median

57

58

59

60

61

62

63

64

65

147 synonymous substitution rate ( $K_s$ ) and non-synonymous substitution rate ( $K_a$ ) based on 7,030  
1  
2 148 SCOs between the two lacertid species were 0.021 and 0.016 respectively. A mutation rate of  
3  
4  
5 149  $1 \times 10^{-9}$  substitutions per site per generation was estimated from the fourfold degenerate sites.  
6  
7 150 This mutation rate observed in the ancestral lacertid lineage is similar to the ancestral bird  
8  
9 151 lineage ( $1.15-1.23 \times 10^{-9}$  per site per generation) [46, 47].  
10

11  
12  
13 152 The identical structures of the HOX-cluster between the lacertid species and *A. carolinensis*  
14  
15 153 confirmed the high genomic assembly quality since the HOX-clusters are highly conserved  
16  
17  
18 154 (supplement SI-1). The number of chromosomes and the sex-determination system are different  
19  
20 155 between *A. carolinensis* ( $2n=36$ , 12 macro- and 24 microchromosomes; XY) and lacertid  
21  
22 156 lizards ( $2n=38$ ; 36 macro- and 2 microchromosomes; ZW) [43, 48]. However, genomic contigs  
23  
24  
25 157 of both lacertid species were syntenic without breaks or inter-chromosomal transpositions to  
26  
27 158 the macro-chromosomes of *A. carolinensis* (Figure S2), even though the lacertids and anoles  
28  
29  
30 159 split more than 150 Mya [49]. The only exception to this was a *L. viridis* contig that splits into  
31  
32 160 two macro-chromosomes of the *A. carolinensis* genome. This particular contig of *L. viridis* was  
33  
34  
35 161 syntenic to five separate contigs in *L. bilineata* assembly, confirming a higher fragmentation in  
36  
37 162 genome assembly of the latter.  
38  
39  
40

41 163 The assembled transcripts were crucial for gene annotations since the *ab initio* methods  
42  
43 164 predicted more fragmented proteins and coding sequences (CDS) (38,000-55,000) when  
44  
45  
46 165 compared to the final gene models (22,100-22,500) (Table S2). A majority of the longest *de*  
47  
48 166 *novo* assembled transcript isoforms were from the ovarian tissue followed by the brain. Since  
49  
50  
51 167 the sequencing throughput was highest for the liver tissue in both species, this finding was not  
52  
53 168 likely the result of sequencing artifacts. We identified 22,156 genes in *L. viridis* and 22,491  
54  
55  
56 169 genes in *L. bilineata* supported by *de novo* assembled transcripts (supplement SI-2; Table S2).  
57  
58 170 The higher number of genes in *L. bilineata* was due to the fragmentation of a few genes onto  
59  
60 171 multiple contigs, which can be resolved in the future with scaffolding information. Compared  
61  
62  
63  
64  
65

172 to *A. carolinensis*, we observed an over-representation of genes involved in transfer RNA  
173 (tRNA) aminoacylation (Panther release 20170413, fold-enrichment=2.13-2.25,  $p<0.03$ ) and  
174 tRNA metabolic process (Panther release 20170413, fold-enrichment=1.84-1.89,  $p<0.003$ ) in  
175 both lacertids, indicating an expansion of tRNA-processing genes before their split. Putative Z-  
176 chromosome linked contigs consisted of few non-coding elements (7-11 microRNAs, 1  
177 snoRNA, 2-3 snRNAs and 46-53 functional tRNAs) (supplement SI-3). The total length of the  
178 contigs assigned to the Z-chromosome in lacertids was larger (13.5-15.6 Mbp) than the Z-  
179 chromosomes of *P. vitticeps* (8 Mbp) but the number of identified genes were similar (205-221  
180 and 219, respectively) [50].

181 The number of predicted members of the different non-coding RNA classes was similar in *L.*  
182 *viridis* and *L. bilineata* (Table S3). Compared to other selected tetrapod species, there was an  
183 increase in the number of tRNAs (both functional- and pseudo-tRNAs) in the two lacertid  
184 species (Figure S5, S6). However, the numbers of tRNAs and pseudo-tRNAs are known to vary  
185 significantly in eukaryotes [51]. We found an over-representation of tRNA-processing genes  
186 supported by the expansion of tRNA elements in both lacertid species maintained through  
187 deletion-duplication events. microRNAs and snoRNAs in the lacertids exhibited losses  
188 compared to *A. carolinensis* (Figure S7, S8). Even though the numbers of snoRNAs and  
189 miRNAs were almost identical, the members in each ncRNA class diversified between the two  
190 sister species. Repeat content also differed between *L. viridis* and *L. bilineata*; with the latter  
191 exhibiting a gain of long-terminal repeat (LTR) elements (Table S4, S5).

## 192 **Demographic history of divergence**

193 Across all sites, mean heterozygosity was slightly lower in *L. bilineata* than in *L. viridis*  
194 ( $\pi=0.0022$  and  $0.0029$  respectively). Absolute divergence per site between the two species as

195 measured by  $D_{xy}$  was around 0.0123. A maximum pairwise  $F_{ST}$  of 0.688 was estimated between  
1  
2 196 *L. viridis* and *L. bilineata*.

3  
4  
5 197 We inferred past divergence and gene flow between the two lacertid species using a likelihood  
6  
7  
8 198 method based on the site frequency spectrum of short sequence blocks i.e. blockwise site  
9  
10 199 frequency spectrum (bSFS) [20, 52]. Since the likelihood calculation assumes no recombination  
11  
12 200 within blocks and an infinite sites mutation model, we partitioned the genome into short (i.e.  
13  
14 201 200 bases) blocks. Our dataset consisted of 5,654,020 blocks, of which 46,825 were filtered out  
15  
16 202 (0.83%) since they contained both fixed differences and shared heterozygous sites thus  
17  
18 203 violating the 4-gametes criterion under the assumption of no recombination within blocks.  
19  
20  
21  
22

23  
24 204 In total, we have 2785 distinct mutational configurations i.e. the counts of the four entries of  
25  
26 205 the folded joint site frequency spectrum (heterozygous sites unique to *L. viridis* and *L. bilineata*;  
27  
28 206 heterozygous sites shared by both lacertids; fixed differences) in each block. 1965 of these  
29  
30 207 blocks appeared more than once in the data (Supplementary Information 3).  
31  
32  
33

34 208 We compared the AIC scores of thirteen different demographic scenarios (Table 1) given the  
35  
36  
37 209 pattern of bSFS between the two lacertid species (Supplementary file 3). However, this  
38  
39 210 composite likelihood computation does not account for the correlation between adjacent blocks  
40  
41  
42 211 due to the physical linkage. To correct for this, we assumed that every 1000th block is  
43  
44 212 effectively unlinked (Supplementary Information 3 Section LD), i.e. statistically independent,  
45  
46 213 and corrected  $\ln C:L$  scores by a factor of 1/200.  
47  
48  
49

50 214 The best of the thirteen models (M3.3) supports isolation between the two lacertid species with  
51  
52 215 unidirectional gene flow from *L. bilineata* to *L. viridis* and fits significantly better than simpler  
53  
54 216 scenarios like divergence without gene flow (or just a single  $N_e$  parameter) or admixture (Table  
55  
56  
57 217 1). This model (M3.3) also suggests a smaller effective population size of *L. bilineata*  
58  
59 218 ( $N_e=37890$ ) compared to its ancestor and *L. viridis* ( $N_e=95400$ ) (supplement SI-4; Table S6)  
60  
61  
62  
63  
64  
65

1  
2  
3  
4  
5  
6  
7  
8  
9  
10  
11  
12  
13  
14  
15  
16  
17  
18  
19  
20  
21  
22  
23  
24  
25  
26  
27  
28  
29  
30  
31  
32  
33  
34  
35  
36  
37  
38  
39  
40  
41  
42  
43  
44  
45  
46  
47  
48  
49  
50  
51  
52  
53  
54  
55  
56  
57  
58  
59  
60  
61  
62  
63  
64  
65

219 and a migration rate of  $M=0.288$  migrants per generation from *L. bilineata* to *L. viridis* (Table  
220 S7).

221 Assuming a generation time of 3.5 years and a mutation rate of  $1.77 \times 10^{-8}$  (based on cyt-b gene)  
222 or  $1 \times 10^{-9}$  (based on the fourfold degenerate sites), our estimate of the split between *L. viridis*  
223 and *L. bilineata* corresponds to 1.15 Mya and 20.37 Mya, respectively (Table S8).

### 224 **Detection of genomic rearrangements**

225 We detected 20,160 genomic rearrangements or structural variants (SVs) longer than 50bp  
226 between the two lacertids (Figure 2; Table S9) covering 39.4 Mbp of the *L. viridis* genome  
227 (2.7% of the genome). Compared to *L. bilineata*, 10.8 Mbp (0.07%) of the *L. viridis* genome  
228 was covered with large rearrangements affecting genes (covering the entire length of more than  
229 one gene). These regions were enriched for RNA-directed DNA polymerase activity (22.46  
230 fold-enrichment,  $p=5.11e-03$ ).

231 Indels are the most frequent genomic rearrangements mainly affecting introns, repeat elements  
232 and pseudo-tRNAs (supplement SI-5; Table S10). This is similar to the observations made with  
233 respect to SVs in humans and pigs [12, 53]. Most SVs overlapping exons cover entire exons  
234 and do not result in frame shift mutations, with the exception of EXD2 and HERC2, suggesting  
235 that their functions can be complemented by other genes (supplement SI-6).

### 236 **Structural selection of ncRNAs**

237 MicroRNAs (miRNA) were the most structurally conserved family of ncRNAs followed by  
238 small nucleolar RNAs (snoRNA) (Figure S9). The four types of ncRNAs and the number of  
239 groups in each category are shown in Table S11 (supplement SI-7). High levels of diversity  
240 were observed in tRNAs, especially in pseudo-tRNA, which was further supported by high copy  
241 numbers of tRNAs with a low conservation among tRNA orthologs between the two lacertid  
242 species.

243 All ncRNAs with low structural diversity across orthologs were computationally tested for sites  
1  
2 244 with positive selection in either species. The positively selected snoRNA families belong to the  
3  
4 245 H/ACA box class, which can introduce changes in post-translational mechanisms and  
5  
6  
7 246 pseudouridylation between the two species [54]. SNORD61 (Small Nucleolar RNA, C/D Box  
8  
9  
10 247 61) (Figure S10a) was inferred to have evolved under positive selection in *L. bilineata*. The  
11  
12 248 human ortholog of SNORD61 occurs in the intron of a RBMX (RNA binding motif protein, X-  
13  
14 249 linked gene), known to be involved in the dosage compensation and cohesion regulation of  
15  
16  
17 250 sister chromatids [55]. Two microRNAs showed signs of positive selection in *L. viridis*:  
18  
19 251 MIR6516 (mir-6516-3p) (Figure S10b), associated with urea synthesis in pigs [56] and MIR27  
20  
21  
22 252 (mir-27a and mir27-d) (Figure S10c), known to play a role in regeneration and osteoblast  
23  
24 253 differentiation in mice [57, 58]. However, mir-27d was absent in *L. bilineata*, so the structural  
25  
26  
27 254 divergence in the mir-27 family between the two lacertid species can be due to the presence of  
28  
29 255 an additional MIR27 sequence in *L. viridis*. Two lincRNAs orthologs (LiNC66 and LiNC29)  
30  
31  
32 256 overlapping genomic regions conserved across tetrapods were structurally divergent between  
33  
34 257 the two species, as indicated by high selection scores and stable secondary structures (Figure  
35  
36 258 S10d-e).

### 39 259 **Varying selection pressures in protein-coding genes**

40  
41  
42 260 The visual opsins are pivotal for adaptation to diurnal habitats in Squamata [24, 59]. For  
43  
44 261 instance, the nocturnal *G. japonicus* lost two of the five functional opsin paralogs compared to  
45  
46  
47 262 diurnal anoles [26]. All five paralogs of visual opsins in *A. carolinensis* (22 transcripts from  
48  
49 263 ENSEMBL) were also present in *L. viridis* and *L. bilineata* (20 transcript sequences), indicating  
50  
51  
52 264 conservation of genes for diurnal vision. We observed high conservation of SWS1 (opsins  
53  
54 265 related to UV vision), described to be involved in sexual selection [60, 61] and of the  
55  
56  
57 266 pigmentation protein MC1R, previously associated with adaptive colouration in sand lizards  
58  
59 267 [62] (supplement SI-8).

268 Genes involved in neuronal activity, behaviour, auditory perception and female reproductive  
1  
2 269 system development were conserved in the lacertid ancestor i.e. before the split between the  
3  
4  
5 270 two species (compared to five other vertebrates in the background). Genes with different  
6  
7 271 selective constraints between the two species (i.e. differently influenced by purifying selection  
8  
9  
10 272 after their split) were related to brain and neural development, embryo and cartilage  
11  
12 273 development along with behavioural responses (Table S12).

13  
14  
15 274 The test for positive selection in either of the two species was performed with the branch-site  
16  
17  
18 275 model of codeml (model M2) using a subset of other lizards as background branches. The  
19  
20 276 number of genes with positively selected sites (PSS) in different foreground branches (*L.*  
21  
22 277 *viridis*; *L. bilineata*; or the ancestor of *L. viridis* and *L. bilineata*) are shown in the Table S13  
23  
24  
25 278 (supplement SI-9). The predicted ontologies of genes with PSS in either of the two species  
26  
27 279 indicate variation in growth and developmental processes, behavioural responses (temperature  
28  
29  
30 280 and pH) and transcriptional regulation (Table S14). One of the genes with PSS in *L. bilineata*  
31  
32 281 (STAR7) is located on the Z-chromosome. We identified two transcription factor genes, UBIP1  
33  
34  
35 282 and RPA2 involved in gene silencing and reproductive functions [63, 64], with adaptive  
36  
37 283 differences between the two species. Three genes with PSS overlapped inverted regions;  
38  
39  
40 284 GPR155 gene with PSS in *L. bilineata*, both TDRD3 and UGPA with PSS in *L. viridis*. GPR155  
41  
42 285 is involved in cognitive functions and expressed in mice forebrain [65] while TDRD3 is directly  
43  
44  
45 286 associated with oocyte formation and X-linked developmental disorders [66, 67]. Three genes  
46  
47 287 NASP, PDL11 and RTKN were positively selected in the ancestor of the lacertid branch  
48  
49  
50 288 compared to background branches that include more distant classes such as mammals and birds  
51  
52 289 (supplement SI-9, Table S15).

53  
54  
55 290 The prostacyclin synthase (PTGIS) involved in regeneration through prostaglandin synthesis is  
56  
57  
58 291 positively selected in *A. carolinensis* and *G. japonicus* [26]. This gene evolved under positive  
59  
60  
61  
62  
63  
64  
65

1  
2  
3  
4  
5  
6  
7  
8  
9  
10  
11  
12  
13  
14  
15  
16  
17  
18  
19  
20  
21  
22  
23  
24  
25  
26  
27  
28  
29  
30  
31  
32  
33  
34  
35  
36  
37  
38  
39  
40  
41  
42  
43  
44  
45  
46  
47  
48  
49  
50  
51  
52  
53  
54  
55  
56  
57  
58  
59  
60  
61  
62  
63  
64  
65

292 selection in the lacertid ancestor with *A. carolinensis* and *G. japonicus* as the background,  
293 hinting at evolutionary changes in regenerative mechanisms among lacertid lizards.

### 294 **Diversification of UV-responsive genes**

295 We identified three paralogs of the hyaluronidases (HYAL1, HYAL2 and HYAL4) in both the  
296 lacertid genomes. Two genes (STIK1 and HYAL2) coding for proteins in the extra-cellular  
297 matrix of the skin reacting to UV-B light (GO:0071493) [68] were positively selected in the  
298 ancestral branch of the two species, while the HYAL1 paralog was positively selected in the *L.*  
299 *viridis* branch (supplement SI-8). Arylsulfatase gene (ARSB) which is involved in the  
300 chondroitin sulfate biosynthesis pathway along with HYAL was also positively selected in *L.*  
301 *viridis*. Significant pathway enrichment of chondroitin sulfate biosynthesis was observed for  
302 PSGs in *L. viridis* ( $p=2.6e-06$ ,  $q=1.3e-05$ ).

### 303 **Divergence of Kruppel-type zinc-finger (KZNF) proteins**

304 To investigate the role of KRAB-ZNFs in reproductive isolation of the two lacertid species, we  
305 compared the DNA-binding domains of KZNF orthologs. From the 53 KZNF orthologs, six  
306 C2H2 zinc-finger proteins showed binding specific differences between the two lacertid species  
307 (supplement SI-10). While the longest transcripts of these six KZNFs were assembled from  
308 ovarian tissues (Table S16), they were also expressed in all the other tissues analyzed (brain,  
309 heart, liver and kidneys).

### 310 **Impact of rearrangements on sequence evolution**

311 Deletions are the most frequent type of SVs in the genome and occurred on both positively  
312 selected genes and those with no signs of positive selection. Duplications and insertions only  
313 occurred in genes evolving without signs of positive selection while deletions and inversions  
314 occurred in genes irrespective of their selective regime. The ratio between number of regions



1  
2  
3  
4  
5  
6  
7  
8  
9  
10  
11  
12  
13  
14  
15  
16  
17  
18  
19  
20  
21  
22  
23  
24  
25  
26  
27  
28  
29  
30  
31  
32  
33  
34  
35  
36  
37  
38  
39  
40  
41  
42  
43  
44  
45  
46  
47  
48  
49  
50  
51  
52  
53  
54  
55  
56  
57  
58  
59  
60  
61  
62  
63  
64  
65

315 with rearrangements or SVs to those with no detected rearrangements was not significantly  
316 different between genes under positive selection and those with no signs of positive selection  
317 (Boschloo's exact test, two-sided; difference in proportion=0.125,  $p=0.06$ ,  $q=0.1$ ). Since this  
318 can be due to abundant indels obscuring the association in other categories of SVs, we tested  
319 the association between each SV category with PSGs separately, applying independent  
320 Boschloo exact-tests (Table S17). An association of PSGs within inversions when compared to  
321 other SV categories was observed, but this did not remain significant after multiple testing  
322 ( $p=0.028$ ,  $q=0.06$ ). We also observed a significant association of PSGs over genes with no signs  
323 of positive selection within inversions compared to both non-rearranged regions ( $p=0.009$ ,  
324  $q=0.03$ ) and collinear regions ( $p=0.006$ ,  $q=0.03$ ). The inversions overlapping PSGs seem to  
325 reflect independent events, since the inversions are located on different contigs in the genome  
326 with size ranges between 70 kbp and 700 kbp.

## 328 **Discussion**

329 We provide the assembled genomes of two closely-related lacertid species, *L. viridis* and *L.*  
330 *bilineata*, investigated their history of divergence and analyzed the patterns of genomic  
331 variation between these species.

332 The assembly contiguity was highest with partial error correction of PacBio reads (without  
333 splitting at chimeric junctions) followed by hybrid assembly through DBG2OLC implementing  
334 removal of chimeric joins. This hybrid assembly strategy aided in generating high quality  
335 contig-level genomes with moderate genome coverages (~35X Illumina and ~15X PacBio).  
336 Our lacertid genome assemblies showed higher completeness than the available lizard genomes  
337 (Table S1).

338 The time of population divergence between *L. viridis* and *L. bilineata* was estimated as at least  
1  
2 339 1.15 Mya (per generation), whereas the previously estimated mitochondrial divergence time  
3  
4 340 was 2.6-3.4 Mya [33, 69]. *L. viridis* and *L. bilineata* show a high level of genome-wide  
5  
6 341 differentiation ( $F_{ST}=0.688$ ). The best demographic model (M3.3) supported unidirectional gene  
7  
8 342 flow from *L. bilineata* to *L. viridis* and higher effective population size for *L. viridis* than *L.*  
9  
10 343 *bilineata* consistent with the difference in genetic diversity between the two lacertid species.  
11  
12  
13  
14

15 344 Species-specific diversity within various ncRNA classes and adaptive differences in ncRNA  
16  
17 345 orthologs capable of altering their secondary structures are two important factors contributing  
18  
19 346 to evolutionary divergence, since varying ncRNA structures imply functional changes [17].  
20  
21 347 Copy number variation and differences in the content of miRNA families hint at variability in  
22  
23 348 gene regulatory networks between the lacertid sister species. Species-specific splicing  
24  
25 349 mechanisms can be attributed to the losses of snoRNA families (SNORA17 and SNORA20) in  
26  
27 350 *L. bilineata* and structural changes in SNORD61, which is involved in dosage compensation in  
28  
29 351 humans [70].  
30  
31  
32  
33  
34  
35

36 352 Positive selection of sites in NASP and PDLIM1 in the lacertid ancestral branch compared to  
37  
38 353 distant background branches, including mammals and birds, may indicate disparate  
39  
40 354 evolutionary changes in the ancestor of *L. viridis* and *L. bilineata* with regard to reproductive  
41  
42 355 processes i.e. spermatogenesis, fertilization and embryo implantation [71-74]. In contrast,  
43  
44 356 positive selection acting on coding sites in just one lacertid species after their split suggests  
45  
46 357 adaptive differences which could play a role in the speciation process [75-77].  
47  
48  
49  
50

51 358 UV-reflectance of plumages in birds is an important trait involved in the sexual selection of  
52  
53 359 morphologically similar sibling species of Passeriformes [78]. Sexual selection in *L. viridis* has  
54  
55 360 been linked to UV-response. Males with more UV-reflective patches on the skin are preferably  
56  
57 361 selected by the females [79, 80]. We show that hyaluronidases, known to be differentially  
58  
59  
60  
61  
62  
63  
64  
65

362 expressed on exposure to UV-B in the skin of mice [68, 81, 82] evolved rapidly in *L. viridis*.

363 We speculate that differential cutaneous response to UV through changes in the chondroitin

364 sulfate (CS) biosynthesis pathway could be driven by mating preferences, which could

365 ultimately contribute to speciation. Further studies are needed to test this hypothesis.

366 KRAB-ZNFs or KZNFs (zinc finger proteins with a *Krüppel*-associated box (KRAB)) are

367 transcriptional regulators confined to tetrapod vertebrates [83] and are known to play a role in

368 species specific changes in gene regulatory network through binding domain differences

369 between humans and chimps [6, 84-87]. The divergence of transcription factors, especially

370 differences in DNA-binding regions of KZNFs as observed here, could eventually have

371 contributed to some degree of reproductive isolation between the two species, which should be

372 further tested. This receives further support from adaptive differences in the transcription

373 factors (UBIP1 and RPA2) crucial for spermatogenesis [63, 64]. Varying levels of purifying

374 selection in genes influencing forebrain development and behaviour suggest different selective

375 constraints between *L. viridis* and *L. bilineata*. The behavioural differences can be related to

376 varying ecological habitats and environmental conditions [35] after the split of *L. viridis* and *L.*

377 *bilineata*. Selective differences in genes related to behaviour and brain development have been

378 reported to be involved in the diversification of anoles [32].

379 Genomic regions harbouring inversions are known to suppress recombination in

380 heterokaryotypes facilitating speciation in the presence of gene flow [88] and in maintaining

381 favourable combinations of locally adapted alleles at different loci [89]. Genomic inversions

382 between the two lacertid species are significantly associated with positively selected genes

383 (PSGs). Two of the three PSGs occurring within inversions play a role in cognitive and

384 reproductive functions (GPR155 and TDRD3), suggesting that they could be involved in

385 speciation. However, it is currently unknown if these inversions represent fixed differences

386 between the two species and the lengths of these inversions is at a lower scale (less than 1 Mbp)

387 than those known to play a role in adaptation and speciation [10]. Future studies should try to  
388 address these issues, as well as the role of these genes in reproductive isolation between *L.*  
389 *viridis* and *L. bilineata*.

390

## 391 **Conclusions**

392 We assembled the first high quality genomes of two closely-related species of European green  
393 lizards with a cost-effective strategy. Genes related to transcriptional regulation, behaviour,  
394 neural and reproductive development have diversified the most between the two lacertid  
395 species. Species-specific diversity of ncRNAs, adaptive evolution in regulatory elements and  
396 transcription factors (including binding domain differences in KZNFs) indicate variation in  
397 gene regulatory networks between the two species. Adaptive evolution of genes responsible for  
398 differential cutaneous response to UV-exposure, in particular, could be driven by mate choice,  
399 and ultimately contribute to reproductive isolation. Altogether, we provide the first  
400 comprehensive study of the evolutionary history, genic, structural and regulatory differences  
401 between the genomes of two closely-related lacertid species. This comprises an important  
402 baseline for understanding the genomic regions and mechanisms involved in the speciation of  
403 European green lizards. In addition to a detailed analysis of the demographic history and  
404 evolutionary scenario of European green lizards, our study provides valuable resources that will  
405 help establish conservation guidelines for lacertids experiencing population declines due to  
406 habitat loss [90].

407

## 408 **Materials and Methods**

## 409 **Sampling**

1  
2  
3 410 Two adult females were sampled for this study, a *L. viridis* from Tokaj, north-eastern Hungary  
4  
5 411 (21.39775°E, 48.11363°N) (September 2013) and a *L. bilineata* from Mâlain, France  
6  
7 412 (4°48'2.01"E, 47°21'16.27"N) (July 2014). There is no known morphological variation  
8  
9 413 between the individuals of the two species (Figure S1). These represent two of the four main  
10  
11 414 clades within the *L. viridis* complex [33, 34, 38, 91]. Animals were captured with permits of  
12  
13 415 the issuing authorities (please refer to the acknowledgements) and handled according to the  
14  
15 416 guidelines of the Herpetological Animal Care and Use Committee (HACC) of the American  
16  
17 417 Society of Ichthyologists and Herpetologists. Tissues from the brain, heart, liver, kidney and  
18  
19 418 ovaries were dissected for tissue-specific transcriptome sequencing and the remaining tissues  
20  
21 419 were stored separately at -80°C.  
22  
23  
24  
25  
26  
27

## 28 420 **Whole-genome and transcriptome sequencing**

29  
30  
31 421 Tail tissue from each sample was digested with proteinase K and genomic DNA was extracted  
32  
33 422 using a chloroform-based method [92]. The whole genome was sequenced using both short  
34  
35 423 (Illumina) and long read (PacBio) sequencing techniques. Short-read libraries with insert sizes  
36  
37 424 of 380bp and 450bp were prepared for each individual separately. The Illumina paired-end  
38  
39 425 sequences were double-indexed using a multiplexing sequencing protocol [93, 94] on a  
40  
41 426 HiSeq2500. SMRTbell™ template library was prepared according to the instructions from  
42  
43 427 PacificBiosciences, Menlo Park, CA, USA, following the Procedure and Checklist – Greater  
44  
45 428 Than 10 kb Template Preparation. Briefly, for preparation of 15kb libraries 10µg (*L. bilineata*)  
46  
47 429 and 20µg (*L. viridis*) genomic DNA was damage-repaired twice, end-repaired and ligated  
48  
49 430 overnight to hairpin adapters applying components from the DNA/Polymerase Binding Kit P6  
50  
51 431 from Pacific BioSciences, Menlo Park, CA, USA. Reactions were carried out according to the  
52  
53 432 manufacturer's instructions. BluePippin™ Size-Selection to greater than 15kb was performed  
54  
55 433 according to the manufacturer's instructions (Sage Science, Beverly, MA, USA). Conditions  
56  
57  
58  
59  
60  
61  
62  
63  
64  
65

1  
2  
3  
4  
5  
6  
7  
8  
9  
10  
11  
12  
13  
14  
15  
16  
17  
18  
19  
20  
21  
22  
23  
24  
25  
26  
27  
28  
29  
30  
31  
32  
33  
34  
35  
36  
37  
38  
39  
40  
41  
42  
43  
44  
45  
46  
47  
48  
49  
50  
51  
52  
53  
54  
55  
56  
57  
58  
59  
60  
61  
62  
63  
64  
65

434 for annealing of sequencing primers and binding of polymerase to purified SMRTbell™  
435 template were assessed with the Calculator in RS Remote, PacificBiosciences, Menlo Park, CA,  
436 USA. Long-read sequencing was carried out for both genomes with 20 SMRT Cells applying  
437 P6-C4 chemistry on a PacBio RS-II sequencer. Average PacBio read lengths of 14kb and 12kb  
438 were retrieved for *L. viridis* and *L. bilineata*, respectively.

439 RNA from each tissue was extracted using Trizol Reagent (Life Technologies, Carlsbad, CA,  
440 USA) and purified with the RNeasy® Mini Kit (Qiagen, Hilden, Germany). The mRNA was  
441 purified using the Dynabeads® mRNA Purification Kit (Life Technologies, Carlsbad, CA,  
442 USA). The purity and concentration of RNA and cDNA were checked using Nanodrop and  
443 Bioanalyzer 2100 (Agilent Technologies, CA, USA) and fragments of length 200-250bp were  
444 obtained using Ambion® RNA fragmentation reagent. The first and second strands of cDNA  
445 were synthesized using random hexamer primers with SuperScript® II reverse transcriptase  
446 (Life Technologies, Carlsbad, CA, USA) and DNA Polymerase I with RNase H treatment (Life  
447 Technologies, Carlsbad, CA, USA) respectively.

448 *L. viridis* was sequenced on a single lane for a more accurate estimate of genome size and repeat  
449 content. In order to avoid lane- and run-biases, sequencing was distributed over three lanes with  
450 all genomes and transcriptomes.

#### 451 **Non-coding RNA (ncRNA) annotation and Repeat analysis**

452 Small ncRNAs were annotated on the genomic contigs by performing an infernal cmscan v1.1.1  
453 (Infernal, RRID:SCR\_011809) using the RFAM covariance models as input and homologous  
454 ncRNA genes were filtered with a cut-off of 1e-06 [95, 96].

455 Additionally, ncRNA class-specific annotation methods were used for tRNAs, snoRNAs and  
456 miRNAs. tRNAs were annotated using tRNAscan-SE v1.3.1 software (tRNAscan-SE,  
457 RRID:SCR\_010835) with default parameters [97]. The BLAST-based snoStrip pipeline [98]

1  
2  
3  
4  
5  
6  
7  
8  
9  
10  
11  
12  
13  
14  
15  
16  
17  
18  
19  
20  
21  
22  
23  
24  
25  
26  
27  
28  
29  
30  
31  
32  
33  
34  
35  
36  
37  
38  
39  
40  
41  
42  
43  
44  
45  
46  
47  
48  
49  
50  
51  
52  
53  
54  
55  
56  
57  
58  
59  
60  
61  
62  
63  
64  
65

458 was used to annotate snoRNAs. A comprehensive set of snoRNAs from vertebrates and aves  
459 were used as query set [99]. To detect miRNAs, the avian set of miRNAs were used as query  
460 sequences for a BLAST search in the lizard genomes. All resulting blast hits were filtered for  
461 the conservation of the seed region. The annotated snoRNAs and miRNAs in lacertids were  
462 validated by blast searches against this reference database and mature miRNA sequence  
463 homologies were used. In the case of overlapping miRNA and snoRNA annotations, both were  
464 retained as it is known that snoRNAs can be processed into small derived RNAs (sdRNAs)  
465 from miRNA-like RNAs [100]. Putative lincRNAs were predicted based on the transcripts with  
466 no coding potential as assessed by Transdecoder of the Trinity v2.6.5 suite (Trinity,  
467 RRID:SCR\_013048) [101] and mapping on their respective genome without chimeric paths.  
468 Furthermore, only the conserved lincRNAs with one-to-one orthologs between lacertids were  
469 retained.

470 For comparison, ncRNA families (except lincRNA) were also annotated in other selected  
471 sauropsid genomes. A reference database was created using sequenced and annotated genomes  
472 from reptiles, aves and other vertebrates. The program ePoPe [102] was used to understand the  
473 evolution of snoRNAs and miRNAs in the lacertids through the construction of phylogenetic  
474 trees based on the gains and losses of ncRNA families.

475 The RepeatModeler v1.0.4 pipeline (RepeatModeler, RRID:SCR\_015027) [103] was used to  
476 predict repeats in the genomes of lacertids. The predicted repeat-families were used as initial  
477 libraries for *de novo* annotation of repeats using RepeatMasker v4.0.5 (RepeatMasker,  
478 RRID:SCR\_012954) [104]. The evolution of these repeats was investigated using the repeat  
479 library available for tetrapod species (Database: 20140131).

## 480 **Population histories, gene flow and coalescence**

1  
2  
3  
4  
5  
6  
7  
8  
9  
10  
11  
12  
13  
14  
15  
16  
17  
18  
19  
20  
21  
22  
23  
24  
25  
26  
27  
28  
29  
30  
31  
32  
33  
34  
35  
36  
37  
38  
39  
40  
41  
42  
43  
44  
45  
46  
47  
48  
49  
50  
51  
52  
53  
54  
55  
56  
57  
58  
59  
60  
61  
62  
63  
64  
65

481 To assess the demographic history between *L. viridis* and *L. bilineata* we used the blockwise  
482 composite likelihood approach. We analytically computed the probabilities of mutational  
483 configurations in blocks of fixed length using the blockwise site frequency spectrum (bSFS)  
484 framework [20].

485 We mapped the illumina reads from *L. viridis* and *L. bilineata* to the *L. viridis* reference genome  
486 with BWA MEM v0.7.12-r1039 software [105]. The homozygosity/heterozygosity of each site  
487 in both lacertids was predicted based on the reference genome with FreeBayes v9.9.13  
488 (FreeBayes, RRID:SCR\_010761) [106] with a minimum read support of five and minimum  
489 allele frequency of 0.2. The intergenic regions of the genome were chopped into blocks of  
490 length 200 bp, this resulted in 5,654,020 blocks in total. The number of four mutation types  
491 defined by the joint SFS (Figure 3) were counted using Heffalump query  
492 (<https://bitbucket.org/ustenzel/heffalump> commit 7773784). In total, 2785 distinct mutational  
493 configurations were obtained, of which 1965 appeared more than once. We then summarized  
494 the frequency of each polymorphism pattern across all blocks [107, 108]. This data summary is  
495 referred to as distribution of bSFS.

496 Blocks containing both fixed differences and shared heterozygous sites, violate the 4-gametes  
497 criterion and 46,825 blocks (0.83%) were removed under the assumption of no recombination  
498 within blocks. To account for physical linkage between adjacent blocks, we assumed that every  
499 1000th block is effectively unlinked, i.e. statistically independent, and corrected lnC:L scores  
500 by a factor of 1/200. We fitted thirteen different demographic scenarios (Figure 2) accounting  
501 for the presence or absence of gene flow, direction of gene flow, continuous or discrete  
502 migration and changes in effective population sizes. Models were compared using the Akaike  
503 information criterion (AIC) of their composite log-likelihoods.

504 We estimated the generation length based on the mean age of the mothers of all offspring [109]  
505 given the age structure data by Elbing [110] and Saint Girons *et al.* [111] for three German



1  
2  
3  
4  
5  
6  
7  
8  
9  
10  
11  
12  
13  
14  
15  
16  
17  
18  
19  
20  
21  
22  
23  
24  
25  
26  
27  
28  
29  
30  
31  
32  
33  
34  
35  
36  
37  
38  
39  
40  
41  
42  
43  
44  
45  
46  
47  
48  
49  
50  
51  
52  
53  
54  
55  
56  
57  
58  
59  
60  
61  
62  
63  
64  
65

506 populations of *L. viridis* and two French populations of *L. bilineata*, respectively. In captivity,  
507 females that breed for the first time lay on average 8.5 eggs, whereas older females lay 11.1  
508 eggs [112]. Given this data, we estimated a mean generation length of 3.6 and 2.9 years for *L.*  
509 *viridis* and *L. bilineata*, respectively. We therefore assumed a generation time of about 3-4 years  
510 for both species. To scale our result in real-time, we used a mutation rate of  $1 \times 10^{-9}$  per site per  
511 generation based on the fourfold degenerate sites of the single-copy gene orthologs between *L.*  
512 *viridis* and *L. bilineata* (supplementary methods SM-4). The lower limit of the mutation rate  
513 was assumed as  $1.77 \times 10^{-8}$  per site per generation (3.5 years as the generation time) based on  
514 the pairwise distance of 6.19% in the cytochrome b gene between *L. viridis* and *L. bilineata*  
515 [34]. This assumption is similar to the mutation rate of NADH-2 in *A. carolinensis* (1.3%  
516 mutations per million years) [113].

#### 517 **Detection of genomic rearrangements from read-based pipelines and syntenic blocks**

518 Genomic rearrangements between the lacertids were detected based on both read-based  
519 methods and syntenic blocks information. *L. viridis* was used as the reference genome since the  
520 assembly was more contiguous for this species. Genomic reads from *L. bilineata* were used as  
521 the query and the reads of *L. viridis* mapped against the reference were used as control.

522 **Read-based pipelines:** Genomic rearrangements were detected between lacertids using read  
523 mapping based methods for Illumina paired-end reads and for PacBio-reads separately,  
524 followed by SV callers specifically developed to deal with short and long read sequences,  
525 respectively. In both approaches, reads of *L. bilineata* (query) and of *L. viridis* (control) were  
526 separately mapped against the same reference (*L. viridis*).

527 The alignment of Illumina reads was carried out with BWA MEM v0.7.12 [105] and  
528 rearrangements were detected with MetaSV v0.5.2 pipeline [114] which uses  
529 BREAKDANCER v1.1.2 (BREAKDANCER, RRID:SCR\_001799) [115] to infer structural

530 variants (SVs) using paired-end read information, CNVnator v0.3.1 (CNVnator,  
1  
2 531 RRID:SCR\_010821) [116] to predict copy-number variants (CNVs) from abnormal read-  
3  
4  
5 532 coverages and Pindel v0.2.4 (Pindel, RRID:SCR\_000560) [117] to detect large SV-related  
6  
7 533 breakpoint events. The insert-size was estimated as  $400\pm 50$  from one million observations  
8  
9  
10 534 based on the alignment of paired-end Illumina reads. A minimum support of five reads and  
11  
12 535 mapping quality of 30 was set as the threshold to support SVs from BREAKDANCER. A bin-  
13  
14 536 size of 500 was used to run CNVnator and only precise SV-events were called. While for Pindel,  
15  
16  
17 537 only variants with minimum read support of 5 paired-reads were used. MetaSV pipeline was  
18  
19 538 used to merge the SVs from these three different SV-callers and local *de novo* assemblies were  
20  
21  
22 539 constructed using the ABYSS assembler for insertions. In order to maintain a high level of  
23  
24 540 sensitivity and specificity (>90%) in the detection of SVs, only the rearrangements called with  
25  
26  
27 541 a minimum support of 8 uniquely mapped paired-end reads were used for further analyses  
28  
29 542 [118].

30  
31  
32 543 The PacBio reads were aligned to the reference with NGMLR v0.2.1 and the alignment was fed  
33  
34  
35 544 to Sniffles v1.0.3 SV-caller [11] to call variants with a minimum support of seven reads (at least  
36  
37 545 half of the PacBio genome coverage of 14X).

38  
39  
40 546 ***Syntenic blocks approach:*** In addition to read-based methods, rearrangements were also  
41  
42  
43 547 detected from the blocks of synteny obtained through the UCSC pipeline [119]. The alignments  
44  
45 548 were converted to single-coverage genomes using *single\_cov2* of the MultiZ pipeline [120] to  
46  
47  
48 549 avoid spurious assignments. Strand changes within syntenic blocks were clustered as inversions  
49  
50 550 (I) based on the orientation of the successive (I+1) and preceding (I-1) blocks. Regions with  
51  
52  
53 551 missing bases in the query alone were predicted to be deletions while gaps in the reference  
54  
55 552 genome alone were considered as insertions. Additionally, Hierarchical Alignment (HAL)  
56  
57 553 format [121] of the single-coverage genomes was used to predict rearrangements with the  
58  
59  
60 554 *halBranchMutations* tool. This tool generates annotations for the location of rearrangements

555 based on the branch of interest in the HAL file (between *L. viridis* and *L. bilineata* in our case).  
1  
2 556 The events detected in both directions i.e. *L. viridis* reference with *L. bilineata* as query and *L.*  
3  
4 557 *bilineata* reference and *L. viridis* as query were retained. The length threshold was set to 50bp  
5  
6  
7 558 and the predicted rearrangements were filtered based on quality to reduce false-positives  
8  
9  
10 559 (supplement SM-7).

11  
12 560 Segmental duplications in the two lacertid species were detected by self-aligning the two  
13  
14  
15 561 genomes separately with chained LASTZ [122] (step=9, H=3000, K=5000). High identity  
16  
17 562 matches (90% identity) within each genome of 1kb or more were defined as segmental  
18  
19  
20 563 duplications.

#### 23 564 **Structural selection in non-coding RNAs (ncRNA)**

24  
25  
26 565 The predicted ncRNAs (miRNA, snoRNA, tRNA and lincRNA) in lacertids were tested for  
27  
28  
29 566 structural selection (selection of sites acting on secondary structure in either of the lacertids)  
30  
31 567 with *Gekko japonicus* as outgroup. We used the Selection on the Secondary Structure test (SSS-  
32  
33  
34 568 test) [123], a statistical test that assigns selection scores for each given sequence based on the  
35  
36 569 comparison between the structure of the given sequence and the structure of group consensus.  
37  
38  
39 570 It also provides a diversity value for the family that indicates its structural conservation. The  
40  
41 571 diversity value (d-score) is the family's median vase-pair distance to its consensus. The  
42  
43 572 miRNAs, snoRNAs and tRNAs were divided into sub-groups based on their families or their  
44  
45  
46 573 anti-codon sequences, and only those sub-groups with at least three sequences were tested. The  
47  
48  
49 574 groups that exhibited high structural diversity (median base pair distance to the consensus,  
50  
51 575  $d \geq 10.0$ ) were excluded from further analyses.

52  
53  
54 576 A ncRNA structural test to detect positively selected structures is only appropriate for  
55  
56 577 structurally conserved groups. Low d-score values ( $d < 10.0$ ) were used to distinguish  
57  
58  
59 578 conservation chosen based on structural uniformity of the groups. This cut-off was based on the  
60  
61  
62  
63  
64  
65

579 visual inspection of the secondary structures of families with d-scores of 1 to 20. Secondary  
580 structures of ncRNA sequences were predicted using RNAfold [124]. In a similar fashion,  
581 structures with selection scores of 0 to 30 were visually compared to the structure of their group  
582 consensus. High selection scores ( $s \geq 10.0$ ) were used to predict the positively selected sequences  
583 of small ncRNAs. Secondary structures with high selection scores were manually inspected to  
584 remove false positives. Specifically, the candidates with structures of low stability or those  
585 fundamentally dissimilar to the family consensus indicating loss of function were excluded.

586 The selection test was adapted for lincRNAs and performed only on the two lacertid species  
587 without any outgroup since lincRNA annotations of other closely-related species were  
588 unavailable. Since the positive selection of secondary structure cannot be determined without  
589 outgroups, we instead detected divergence of lincRNA structure within the lacertids. Local  
590 conserved structure blocks were predicted for the orthologous lincRNA families and these  
591 blocks were subjected to an adaptation of SSS-test based on local structures. The structural  
592 selection for lincRNAs was assessed locally, since most base-pairings occur between  
593 nucleotides within a short distance [123, 125]. Local blocks of high structural diversity were  
594 excluded from further analysis. Since outgroups were not used for lincRNAs, a lower selection  
595 score threshold ( $s \geq 4.0$ ) was applied to detect divergent candidates which were visually  
596 inspected later to exclude false-positives.

### 597 **Ortholog prediction and selection tests**

598 In order to investigate the selection pressure in the lacertid branch (ancestor of *L. viridis* and *L.*  
599 *bilineata*) compared to other vertebrates, the coding sequences (CDS) of five species, namely  
600 anole lizard (*Anolis carolinensis*), chicken (*Gallus gallus*), frog (*Xenopus tropicalis*), spotted  
601 garfish (*Lepisosteus oculatus*) and human (*Homo sapiens*) were downloaded from the Ensembl  
602 database version 83 (Ensembl, RRID:SCR\_002344) [126]. To keep the data consistent and  
603 avoid re-annotations, the CDS annotations were also extracted from the Ensembl database. The

1  
2  
3  
4  
5  
6  
7  
8  
9  
10  
11  
12  
13  
14  
15  
16  
17  
18  
19  
20  
21  
22  
23  
24  
25  
26  
27  
28  
29  
30  
31  
32  
33  
34  
35  
36  
37  
38  
39  
40  
41  
42  
43  
44  
45  
46  
47  
48  
49  
50  
51  
52  
53  
54  
55  
56  
57  
58  
59  
60  
61  
62  
63  
64  
65

604 orthologs between the protein-coding sequences of the species were identified with  
605 ProteinOrtho V5 using the synteny option to reduce false orthologs assignments. The output  
606 was converted to run the POTION pipeline [127] which tests for selection acting on protein  
607 coding genes. Only the single-copy orthologs in each species were retained for each orthologous  
608 group.

609 The protein identity filtering in POTION was set to 30% in each orthologous group and  
610 sequence size limits to more than 10 times or less than 0.2 of the median size in the group. Only  
611 groups with at least 4 species were retained. The sequences in each orthologous group (after  
612 filtering paralogs) were aligned, gap trimmed, phylogenetic trees were constructed and groups  
613 with recombinants were excluded from the selection tests. The intermediates files from the  
614 POTION pipeline were used to generate unrooted trees with lacertids (*L. viridis* and *L.*  
615 *bilineata*) in the foreground branches. The remaining species were used as the background to  
616 test for positive-selection using the branch-site model of codeml within the PAML v4.8 package  
617 (PAML, RRID:SCR\_014932) [128]. A likelihood ratio test (LRT) based on  $\chi^2$  distribution was  
618 used to detect genes with significant positive selection followed by multiple testing through  
619 Benjamini–Hochberg (BH) procedure. Genes with  $p < 0.05$  and  $q < 0.05$  were retained and  
620 referred to as being positively selected in the lacertid branch.

621 To detect adaptive evolution through positive selection within either lacertids, additional tests  
622 (PAML branch-site models) were performed with less distant outgroups using a set of five  
623 lizard species, namely *L. viridis*, *L. bilineata*, *Anolis carolinensis*, *Gekko japonicus* and *Pogona*  
624 *vitticeps*. The single-copy orthologs were identified with ProteinOrtho with a minimum protein  
625 identity of 70%, e-value of 1e-06 and minimum similarity of 0.99 for additional hits. The  
626 orthologous coding sequences from the five lizard species were aligned with MACSE while  
627 accounting for frame-shifts and the stop codon at the end of the sequence was removed.  
628 Unrooted trees were generated with three different foreground branches: i) lacertids (*L. viridis*

1  
2  
3  
4  
5  
6  
7  
8  
9  
10  
11  
12  
13  
14  
15  
16  
17  
18  
19  
20  
21  
22  
23  
24  
25  
26  
27  
28  
29  
30  
31  
32  
33  
34  
35  
36  
37  
38  
39  
40  
41  
42  
43  
44  
45  
46  
47  
48  
49  
50  
51  
52  
53  
54  
55  
56  
57  
58  
59  
60  
61  
62  
63  
64  
65

629 and *L. bilineata*) ii) *L. viridis* alone and iii) *L. bilineata* alone. The rest of the workflow for  
630 detection of recombinants, removal of gaps and codeml tests was similar to the POTION  
631 pipeline followed by filtering for significant candidate genes ( $p < 0.05$ ,  $q < 0.05$ ). In order to  
632 avoid false predictions of positively selected sites (PSS) at the beginning or towards the end of  
633 alignments, where mismatches were allowed, the candidate genes predicted to contain PSS in  
634 either species were visually inspected.

## 636 **Abbreviations**

637 bp: base pairs; BH: Benjamini-Hochberg; bSFS: blockwise site frequency spectrum; BUSCO:  
638 Benchmarking Universal Single-Copy Orthologs; CDS: Coding sequences; CNVs: copy-  
639 number variants; DNA: Deoxyribo nucleic acid; GO: Gene ontology; GC: Guanine-Cytosine;  
640 Gb: Giga base pairs; HAL: Hierarchical alignment format; HMM: Hidden markov model;  
641 HYAL: Hyaluronidase; Indels: insertions and deletions; kb: kilo bases; KZNF: Krüppel-type  
642 zinc finger; LRT: Likelihood ratio test; LTR: long-terminal repeat; lincRNA: long intergenic  
643 non-coding RNA; LINE: long interspersed nuclear element; Mbp: Mega base pair; miRNA:  
644 microRNA; Mya: Million years ago; NCBI: National Center for Biotechnology information;  
645 ncRNA: non-coding RNA; PSGs: Positively selected genes; PSS: Positively selected site;  
646 rRNA: ribosomal RNA; RNA: Ribonucleic acid; sdRNA: small derived RNA; SFS: Site  
647 frequency spectrum; SINE: Short interspersed nuclear element; SNP: Single nucleotide  
648 polymorphism; snoRNA: Small nucleolar RNA; SVs: Structural variants; tRNA: transfer RNA;  
649 VCF: Variant call format

## 651 **Availability of Supporting Data**

1  
2  
3  
4  
5  
6  
7  
8  
9  
10  
11  
12  
13  
14  
15  
16  
17  
18  
19  
20  
21  
22  
23  
24  
25  
26  
27  
28  
29  
30  
31  
32  
33  
34  
35  
36  
37  
38  
39  
40  
41  
42  
43  
44  
45  
46  
47  
48  
49  
50  
51  
52  
53  
54  
55  
56  
57  
58  
59  
60  
61  
62  
63  
64  
65

652 Genome assembly, annotations, transcript data, variant calls (VCFs), snapshots of the code and  
653 other supporting datasets are available in Zenodo [129] and in the GigaScience GigaDB [130]  
654 repositories.

## 656 **Declarations**

## 657 **Acknowledgements**

658 The authors thank the reviewers, curators and the journal editors for their constructive criticisms  
659 on our manuscript. We gratefully acknowledge the support of the German Centre for Integrative  
660 Biodiversity Research (iDiv) Halle-Jena-Leipzig funded by the German Research Foundation  
661 (FZT 118). We also thank Conrad Helm, Detlef Bernhard, Michael Gerth, Ronny Wolf and  
662 Stefan Schaffer for their help in the laboratory; Steve Hoffmann and Thomas Hackl for valuable  
663 discussions and Stephane Peyrégne for helpful suggestions and proofreading. The specimen  
664 from Hungary was kindly collected and provided by the team of Szabolcs Lengyel, Centre for  
665 Ecological Research, Hungarian Academy of Science. Capture permit (No. 13778-7/ 2013) was  
666 issued by the North Hungarian Environmental Protection, Nature Conservation and Water  
667 Management Inspectorate. Capture permit (No. 36) for the French specimen was issued by the  
668 Préfet de la Côte d'Or. KN and RF thank the Volkswagen Foundation for funding within the  
669 framework "Support for Europe". RF was financed by FCT [grant number  
670 SFRH/BPD/89313/2012] and is currently funded by the European Union's Horizon 2020  
671 research and innovation programme, under the Marie Skłodowska-Curie grant agreement  
672 number 706376.

## 673 **Funding**

674 This project was funded by the Deutsche Forschungsgemeinschaft (FZT 118).

675 **Declaration of interest**

1  
2 676 The authors report no conflicts of interest. The authors alone are responsible for the content and  
3  
4  
5 677 writing of the paper.  
6  
7

8 678 **Author contributions**  
9

10 679 K. H. and A. G. collected the samples; A. W. Illumina sequenced the genome and  
11  
12  
13 680 transcriptome; C. S., B. B. and J. O. were involved in the PacBio genome sequencing; S. R. R.  
14  
15 681 K. performed the assembly and annotation; S. K. and S. R. R. K. annotated the non-coding  
16  
17  
18 682 RNA; M. B. W. C. analyzed selection in non-coding RNA; S. R. R. K. and H. I. performed the  
19  
20 683 positive selection analysis; S. R. R. K. and M. C. analyzed structural variants; A. S. and K. L.  
21  
22 684 analysed the population histories; S. R. R. K., R. F., K. N., P. F. S. and M. S. wrote the initial  
23  
24  
25 685 draft of the manuscript; H. I., M. C., A.S., K. L., S. K., M. B. W. C., J. O., B. B., C. B. and K.  
26  
27 686 H. edited the manuscript; R.F., K. N., K. H., P. F. S. and M. S. conceived the study.  
28  
29  
30

31 687 **Additional files**  
32

33  
34 688 Additional file 1: This supplement contains methods SM1-SM11, information SI1-SI11,  
35  
36 689 Figures S1–S10, Tables S1–S17 and References.  
37

38  
39 690 Additional file 2: The figure for the contig clusters in lacertids generated from synteny  
40  
41 691 information between *L. viridis* and *L. bilineata*.  
42

43 692 Additional file 3: *Mathematica* notebook containing the code used and other supporting  
44  
45 693 information from the demography analysis of *L. viridis* and *L. bilineata*.  
46  
47  
48  
49

50 694  
51  
52

53 695 **References**  
54  
55

- 56 696 1. Coyne JA, Orr HA: **Speciation**: Sinauer Associates; 2004.  
57 697 2. Presgraves DC: **The molecular evolutionary basis of species formation**. *Nat Rev Genet* 2010,  
58 698 **11**(3):175-180.  
59 699 3. Charlesworth B, Coyne JA, H. Barton N: **The Relative Rates of Evolution of Sex Chromosomes**  
60 700 **and Autosomes**. *American naturalist* 1987, **130**(1):113-146.  
61  
62  
63  
64  
65



- 701 4. Masly JP, Presgraves DC: **High-resolution genome-wide dissection of the two rules of**  
1 702 **speciation in *Drosophila***. *PLoS Biol* 2007, **5**(9):e243.
- 2 703 5. Mack KL, Campbell P, Nachman MW: **Gene regulation and speciation in house mice**. *Genome*  
3 704 *Res* 2016, **26**(4):451-461.
- 4 705 6. Nowick K, Carneiro M, Faria R: **A prominent role of KRAB-ZNF transcription factors in**  
5 706 **mammalian speciation?** *Trends Genet* 2013, **29**(3):130-139.
- 7 707 7. Ortiz-Barrientos D, Kane NC: **Meeting review: American Genetics Association Symposium on**  
8 708 **the genetics of speciation**. *Mol Ecol* 2007, **16**(14):2852-2854.
- 9 709 8. Ravinet M, Faria R, Butlin RK, Galindo J, Bierne N, Rafajlović M, Noor MAF, Mehlig B, Westram  
10 710 AM: **Interpreting the genomic landscape of speciation: a road map for finding barriers to**  
11 711 **gene flow**. *Journal of Evolutionary Biology* 2017, **30**(8):1450-1477.
- 12 712 9. Seehausen O, Butlin RK, Keller I, Wagner CE, Boughman JW, Hohenlohe PA, Peichel CL, Saetre  
13 713 GP, Bank C, Brannstrom A *et al*: **Genomics and the origin of species**. *Nat Rev Genet* 2014,  
14 714 **15**(3):176-192.
- 15 715 10. Wellenreuther M, Bernatchez L: **Eco-Evolutionary Genomics of Chromosomal Inversions**.  
16 716 *Trends in Ecology & Evolution* 2018, **33**(6):427-440.
- 17 717 11. Sedlazeck FJ, Rescheneder P, Smolka M, Fang H, Nattestad M, von Haeseler A, Schatz MC:  
18 718 **Accurate detection of complex structural variations using single-molecule sequencing**.  
19 719 *Nature Methods* 2018.
- 20 720 12. Sudmant PH, Rausch T, Gardner EJ, Handsaker RE, Abyzov A, Huddleston J, Zhang Y, Ye K, Jun  
21 721 G, Hsi-Yang Fritz M *et al*: **An integrated map of structural variation in 2,504 human genomes**.  
22 722 *Nature* 2015, **526**(7571):75-81.
- 23 723 13. Alkan C, Coe BP, Eichler EE: **Genome structural variation discovery and genotyping**. *Nat Rev*  
24 724 *Genet* 2011, **12**(5):363-376.
- 25 725 14. Davey JW, Barker SL, Rastas PM, Pinharanda A, Martin SH, Durbin R, McMillan WO, Merrill RM,  
26 726 Jiggins CD: **No evidence for maintenance of a sympatric *Heliconius* species barrier by**  
27 727 **chromosomal inversions**. *Evolution Letters* 2017, **1**(3):138-154.
- 28 728 15. Walter Costa MB, Honer Zu Siederdisen C, Tulpan D, Stadler PF, Nowick K: **Temporal ordering**  
29 729 **of substitutions in RNA evolution: Uncovering the structural evolution of the Human**  
30 730 **Accelerated Region 1**. *J Theor Biol* 2017, **438**:143-150.
- 31 731 16. Frías-Lasserre D, Villagra CA: **The Importance of ncRNAs as Epigenetic Mechanisms in**  
32 732 **Phenotypic Variation and Organic Evolution**. *Frontiers in Microbiology* 2017, **8**:2483.
- 33 733 17. Bhartiya D, Scaria V: **Genomic variations in non-coding RNAs: Structure, function and**  
34 734 **regulation**. *Genomics* 2016, **107**(2-3):59-68.
- 35 735 18. Gardner PP, Fasold M, Burge SW, Ninova M, Hertel J, Kehr S, Steeves TE, Griffiths-Jones S,  
36 736 Stadler PF: **Conservation and losses of non-coding RNAs in avian genomes**. *PLoS One* 2015,  
37 737 **10**(3):e0121797.
- 38 738 19. Sousa V, Hey J: **Understanding the Origin of Species with Genome-Scale Data: the Role of**  
39 739 **Gene Flow**. *Nature reviews Genetics* 2013, **14**(6):404-414.
- 40 740 20. Lohse K, Chmelik M, Martin SH, Barton NH: **Efficient Strategies for Calculating Blockwise**  
41 741 **Likelihoods Under the Coalescent**. *Genetics* 2016, **202**(2):775-786.
- 42 742 21. Camargo A, Sinervo B, Sites JW, Jr.: **Lizards as model organisms for linking phylogeographic**  
43 743 **and speciation studies**. *Mol Ecol* 2010, **19**(16):3250-3270.
- 44 744 22. Thorpe RS, Surget-Groba Y, Johansson H: **The relative importance of ecology and geographic**  
45 745 **isolation for speciation in anoles**. *Philosophical Transactions of the Royal Society B: Biological*  
46 746 *Sciences* 2008, **363**(1506):3071.
- 47 747 23. Alföldi J, Di Palma F, Grabherr M, Williams C, Kong L, Mauceli E, Russell P, Lowe CB, Glor RE,  
48 748 Jaffe JD *et al*: **The genome of the green anole lizard and a comparative analysis with birds**  
49 749 **and mammals**. *Nature* 2011, **477**(7366):587-591.
- 50 750 24. Gao J, Li Q, Wang Z, Zhou Y, Martelli P, Li F, Xiong Z, Wang J, Yang H, Zhang G: **Sequencing, de**  
51 751 **novo assembling, and annotating the genome of the endangered Chinese crocodile lizard**  
52 752 ***Shinisaurus crocodilurus***. *GigaScience* 2017, **6**(7):1-6.

- 753 25. Rice ES, Kohno S, John JS, Pham S, Howard J, Lareau LF, O'Connell BL, Hickey G, Armstrong J,  
 1 754 Deran A *et al*: **Improved genome assembly of American alligator genome reveals conserved**  
 2 755 **architecture of estrogen signaling**. *Genome Res* 2017, **27**(5):686-696.
- 3 756 26. Liu Y, Zhou Q, Wang Y, Luo L, Yang J, Yang L, Liu M, Li Y, Qian T, Zheng Y *et al*: **Gekko japonicus**  
 4 757 **genome reveals evolution of adhesive toe pads and tail regeneration**. 2015, **6**:10033.
- 5 758 27. Georges A, Li Q, Lian J, O'Meally D, Deakin J, Wang Z, Zhang P, Fujita M, Patel HR, Holleley CE  
 6 759 *et al*: **High-coverage sequencing and annotated assembly of the genome of the Australian**  
 7 760 **dragon lizard Pogona vitticeps**. *GigaScience* 2015, **4**(1):45.
- 8 761 28. Castoe T, Koning A, Hall K, Card D, Schield D, Fujita M: **The Burmese python genome reveals**  
 9 762 **the molecular basis for extreme adaptation in snakes**. *Proc Natl Acad Sci U S A* 2013, **110**.
- 10 763 29. Vonk F, Casewell N, Henkel C, Heimberg A, Jansen H, McCleary R: **The king cobra genome**  
 11 764 **reveals dynamic gene evolution and adaptation in the snake venom system**. *Proc Natl Acad*  
 12 765 *Sci U S A* 2013, **110**.
- 13 766 30. Shaffer H, Minx P, Warren D, Shedlock A, Thomson R, Valenzuela N: **The western painted turtle**  
 14 767 **genome, a model for the evolution of extreme physiological adaptations in a slowly evolving**  
 15 768 **lineage**. *Genome Biol* 2013, **14**.
- 16 769 31. Wang Z, Pascual-Anaya J, Zadissa A, Li W, Niimura Y, Huang Z: **The draft genomes of soft-shell**  
 17 770 **turtle and green sea turtle yield insights into the development and evolution of the turtle-**  
 18 771 **specific body plan**. *Nat Genet* 2013, **45**.
- 19 772 32. Tollis M, Hutchins ED, Stapley J, Rupp SM, Eckalbar WL, Maayan I, Lasku E, Infante CR, Dennis  
 20 773 SR, Robertson JA *et al*: **Comparative Genomics Reveals Accelerated Evolution in Conserved**  
 21 774 **Pathways during the Diversification of Anole Lizards**. *Genome Biology and Evolution* 2018,  
 22 775 **10**(2):489-506.
- 23 776 33. Böhme MU, Fritz U, Kotenko T, Georg D, Ljubisavljević K, Tzankov N, Berendonk TU:  
 24 777 **Phylogeography and cryptic variation within the Lacerta viridis complex (Lacertidae,**  
 25 778 **Reptilia)**. *Zoologica Scripta* 2007, **36**(2):119-131.
- 26 779 34. Marzahn E, Mayer W, Joger U, Ilgaz Ç, Jablonski D, Kindler C, Kumlutaş Y, Nistri A, Schneeweiss  
 27 780 N, Vamberger M *et al*: **Phylogeography of the Lacerta viridis complex: mitochondrial and**  
 28 781 **nuclear markers provide taxonomic insights**. *Journal of Zoological Systematics and*  
 29 782 *Evolutionary Research* 2016, **54**(2):85-105.
- 30 783 35. Tvrtkovi N, Lazar B, Tome S, Grbac I: **The western green lizard Lacerta (viridis) bilineata**  
 31 784 **Daudin, 1804 (Sauria: Lacertidae) in Slovenia and Croatia**. *Natura Croatica* 1998, **7**(4):363-  
 32 785 369.
- 33 786 36. Amann T, Rykena S, Joger U, Nettmann HK, Veith M: **Zur artlichen Trennung von Lacerta**  
 34 787 **bilineata DAUDIN, 1802 und L. viridis (LAURENTI, 1768)** *Salamandra* 1997, **33**(4):255-268.
- 35 788 37. Joger U, Amann T, Veith M: **Phylogeographie und genetische differenzierung im Lacerta**  
 36 789 **viridis/bilineata komplex**. *Mertensiella* 2001, **13**:60-68.
- 37 790 38. Rykena S: **Kreuzungsexperimente zur Prüfung der Artgrenzen im Genus Lacerta sensu stricto**.  
 38 791 *Zoosystematics And Evolution* 1991, **67**(1):55-68.
- 39 792 39. Noor MA, Grams KL, Bertucci LA, Reiland J: **Chromosomal inversions and the reproductive**  
 40 793 **isolation of species**. *Proc Natl Acad Sci U S A* 2001, **98**(21):12084-12088.
- 41 794 40. Navarro A, Barton NH: **Chromosomal speciation and molecular divergence--accelerated**  
 42 795 **evolution in rearranged chromosomes**. *Science* 2003, **300**(5617):321-324.
- 43 796 41. Faria R, Navarro A: **Chromosomal speciation revisited: rearranging theory with pieces of**  
 44 797 **evidence**. *Trends Ecol Evol* 2010, **25**(11):660-669.
- 45 798 42. Olmo E: **Rate of chromosome changes and speciation in reptiles**. *Genetica* 2005, **125**(2-  
 46 799 3):185-203.
- 47 800 43. Olmo E, Odierna G, Cobror O: **C-band variability and phylogeny of Lacertidae**. *Genetica* 1986,  
 48 801 **71**:63-74.
- 49 802 44. Kupriyanova L, Kuksin A, Odierna G: **Karyotype, chromosome structure, reproductive**  
 50 803 **modalities of three Southern Eurasian populations of the common lacertid lizard, Zootoca**  
 51 804 **vivipara (Jacquin, 1787)**. *Acta Herpetologica; Vol 3, No 2 (2008)* 2008.

- 805 45. Liu H, Chang LH, Sun Y, Lu X, Stubbs L: **Deep Vertebrate Roots for Mammalian Zinc Finger**  
1 806 **Transcription Factor Subfamilies.** *Genome Biol Evol* 2014, **6**(3):510-525.
- 2 807 46. Smeds L, Qvarnström A, Ellegren H: **Direct estimate of the rate of germline mutation in a bird.**  
3 808 *Genome Research* 2016, **26**(9):1211-1218.
- 4 809 47. Nam K, Mugal C, Nabholz B, Schielzeth H, Wolf JBW, Backström N, Künstner A, Balakrishnan  
5 810 CN, Heger A, Ponting CP *et al*: **Molecular evolution of genes in avian genomes.** *Genome*  
6 811 *Biology* 2010, **11**(6):R68-R68.
- 7 812 48. Chiarelli AB, Capanna E: **Cytotaxonomy and Vertebrate Evolution Edited by A.B. Chiarelli and**  
8 813 **E. Capanna; 1973.**
- 9 814 49. Townsend TM, Mulcahy DG, Noonan BP, Sites JW, Kuczynski CA, Wiens JJ, Reeder TW:  
10 815 **Phylogeny of iguanian lizards inferred from 29 nuclear loci, and a comparison of**  
11 816 **concatenated and species-tree approaches for an ancient, rapid radiation.** *Molecular*  
12 817 *Phylogenetics and Evolution* 2011, **61**(2):363-380.
- 13 818 50. Deakin JE, Edwards MJ, Patel H, O'Meally D, Lian J, Stenhouse R, Ryan S, Livernois AM, Azad B,  
14 819 Holleley CE *et al*: **Anchoring genome sequence to chromosomes of the central bearded**  
15 820 **dragon (*Pogona vitticeps*) enables reconstruction of ancestral squamate**  
16 821 **macrochromosomes and identifies sequence content of the Z chromosome.** *BMC Genomics*  
17 822 2016, **17**:447.
- 18 823 51. Bermudez-Santana C, Attolini CS-O, Kirsten T, Engelhardt J, Prohaska SJ, Steigele S, Stadler PF:  
19 824 **Genomic organization of eukaryotic tRNAs.** *BMC Genomics* 2010, **11**(1):270.
- 20 825 52. Bunnefeld L, Frantz LA, Lohse K: **Inferring Bottlenecks from Genome-Wide Samples of Short**  
21 826 **Sequence Blocks.** *Genetics* 2015, **201**(3):1157-1169.
- 22 827 53. Zhao P, Li J, Kang H, Wang H, Fan Z, Yin Z, Wang J, Zhang Q, Wang Z, Liu J-F: **Structural Variant**  
23 828 **Detection by Large-scale Sequencing Reveals New Evolutionary Evidence on Breed**  
24 829 **Divergence between Chinese and European Pigs.** 2016, **6**:18501.
- 25 830 54. Kiss T, Fayet-Lebaron E, Jády BE: **Box H/ACA Small Ribonucleoproteins.** *Molecular Cell* 2010,  
26 831 **37**(5):597-606.
- 27 832 55. Matsunaga S, Takata H, Morimoto A, Hayashihara K, Higashi T, Akatsuchi K, Mizusawa E,  
28 833 Yamakawa M, Ashida M, Matsunaga TM *et al*: **RBMX: a regulator for maintenance and**  
29 834 **centromeric protection of sister chromatid cohesion.** *Cell Rep* 2012, **1**(4):299-308.
- 30 835 56. Sun R-P, Xi Q-Y, Sun J-J, Cheng X, Zhu Y-L, Ye D-Z, Chen T, Wei L-M, Ye R-S, Jiang Q-Y *et al*: **In**  
31 836 **low protein diets, microRNA-19b regulates urea synthesis by targeting SIRT5.** *Scientific*  
32 837 *Reports* 2016, **6**:33291.
- 33 838 57. Wang T, Xu Z: **miR-27 promotes osteoblast differentiation by modulating Wnt signaling.**  
34 839 *Biochem Biophys Res Commun* 2010, **402**(2):186-189.
- 35 840 58. Clevers H, Loh KM, Nusse R: **Stem cell signaling. An integral program for tissue renewal and**  
36 841 **regeneration: Wnt signaling and stem cell control.** *Science* 2014, **346**(6205):1248012.
- 37 842 59. Ricklefs RE, Losos JB, Townsend TM: **Evolutionary diversification of clades of squamate**  
38 843 **reptiles.** *J Evol Biol* 2007, **20**(5):1751-1762.
- 39 844 60. van Hazel I, Sabouhian A, Day L, Endler JA, Chang BSW: **Functional characterization of**  
40 845 **spectral tuning mechanisms in the great bowerbird short-wavelength sensitive visual**  
41 846 **pigment (SWS1), and the origins of UV/violet vision in passerines and parrots.** *BMC*  
42 847 *Evolutionary Biology* 2013, **13**:250-250.
- 43 848 61. de Lanuza GPI, Font E: **Ultraviolet vision in lacertid lizards: evidence from retinal structure,**  
44 849 **eye transmittance, SWS1 visual pigment genes and behaviour.** *The Journal of Experimental*  
45 850 *Biology* 2014, **217**(16):2899.
- 46 851 62. Laurent S, Pfeifer SP, Settles ML, Hunter SS, Hardwick KM, Ormond L, Sousa VC, Jensen JD,  
47 852 Rosenblum EB: **The population genomics of rapid adaptation: disentangling signatures of**  
48 853 **selection and demography in white sands lizards.** *Molecular Ecology* 2016, **25**(1):306-323.
- 49 854 63. Kim JS, Chae JH, Cheon YP, Kim CG: **Reciprocal localization of transcription factors YY1 and**  
50 855 **CP2c in spermatogonial stem cells and their putative roles during spermatogenesis.** *Acta*  
51 856 *Histochem* 2016, **118**(7):685-692.

- 857 64. Elmayan T, Proux F, Vaucheret H: **Arabidopsis RPA2: a genetic link among transcriptional gene silencing, DNA repair, and DNA replication.** *Curr Biol* 2005, **15**(21):1919-1925.
- 1 858
- 2 859 65. Trifonov S, Houtani T, Shimizu J-i, Hamada S, Kase M, Maruyama M, Sugimoto T: **GPR155: Gene organization, multiple mRNA splice variants and expression in mouse central nervous system.** *Biochemical and Biophysical Research Communications* 2010, **398**(1):19-25.
- 3 860
- 4 861
- 5 862 66. Laisk-Podar T, Kaart T, Peters M, Salumets A: **Genetic variants associated with female reproductive ageing – potential markers for assessing ovarian function and ovarian stimulation outcome.** *Reproductive BioMedicine Online* 2015, **31**(2):199-209.
- 6 863
- 7 864
- 8 865 67. Linder B, Plöttner O, Kroiss M, Hartmann E, Laggerbauer B, Meister G, Keidel E, Fischer U: **Tdrd3 is a novel stress granule-associated protein interacting with the Fragile-X syndrome protein FMRP.** *Human Molecular Genetics* 2008, **17**(20):3236-3246.
- 9 866
- 10 867
- 11 868 68. Tobiishi M, Sayo T, Yoshida H, Kusaka A, Kawabata K, Sugiyama Y, Ishikawa O, Inoue S: **Changes in epidermal hyaluronan metabolism following UVB irradiation.** *Journal of Dermatological Science* 2011, **64**(1):31-38.
- 12 869
- 13 870
- 14 871 69. Kolora SR, Faria R, Weigert A, Schaffer S, Grimm A, Henle K, Sahyoun AH, Stadler PF, Nowick K, Bleidorn C *et al*: **The complete mitochondrial genome of *Lacerta bilineata* and comparison with its closely related congener *L. viridis*.** *Mitochondrial DNA Part A* 2017, **28**(1):116-118.
- 15 872
- 16 873
- 17 874 70. Sperveslage J, Hoffmeister M, Henopp T, Klöppel G, Sipos B: **Establishment of robust controls for the normalization of miRNA expression in neuroendocrine tumors of the ileum and pancreas.** *Endocrine* 2014, **46**(2):226-230.
- 18 875
- 19 876
- 20 877 71. Finn RM, Ellard K, Eirin-Lopez JM, Ausio J: **Vertebrate nucleoplasmin and NASP: egg histone storage proteins with multiple chaperone activities.** *FASEB J* 2012, **26**(12):4788-4804.
- 21 878
- 22 879 72. Nagatomo H, Kohri N, Akizawa H, Hoshino Y, Yamauchi N, Kono T, Takahashi M, Kawahara M: **Requirement for nuclear autoantigenic sperm protein mRNA expression in bovine preimplantation development.** *Anim Sci J* 2016, **87**(3):457-461.
- 23 880
- 24 881
- 25 882 73. Shang Y, Wang H, Jia P, Zhao H, Liu C, Liu W, Song Z, Xu Z, Yang L, Wang Y *et al*: **Autophagy regulates spermatid differentiation via degradation of PDLIM1.** *Autophagy* 2016, **12**(9):1575-1592.
- 26 883
- 27 884
- 28 885 74. Yin J, Ni B, Tian ZQ, Yang F, Liao WG, Gao YQ: **Regulatory effects of autophagy on spermatogenesis.** *Biol Reprod* 2017, **96**(3):525-530.
- 29 886
- 30 887 75. Chen J, Shishkin AA, Zhu X, Kadri S, Maza I, Guttman M, Hanna JH, Regev A, Garber M: **Evolutionary analysis across mammals reveals distinct classes of long non-coding RNAs.** *Genome Biol* 2016, **17**:19.
- 31 888
- 32 889
- 33 890 76. Wiberg RA, Halligan DL, Ness RW, Necsulea A, Kaessmann H, Keightley PD: **Assessing Recent Selection and Functionality at Long Noncoding RNA Loci in the Mouse Genome.** *Genome Biol Evol* 2015, **7**(8):2432-2444.
- 34 891
- 35 892
- 36 893 77. Zhen Y, Andolfatto P: **Methods to detect selection on noncoding DNA.** *Methods Mol Biol* 2012, **856**:141-159.
- 37 894
- 38 895 78. Bleiweiss R: **Ultraviolet plumage reflectance distinguishes sibling bird species.** *Proceedings of the National Academy of Sciences of the United States of America* 2004, **101**(47):16561.
- 39 896
- 40 897 79. Bajer K, Molnár O, Török J, Herczeg G: **Female European green lizards (*Lacerta viridis*) prefer males with high ultraviolet throat reflectance.** *Behavioral Ecology and Sociobiology* 2010, **64**(12):2007-2014.
- 41 898
- 42 899
- 43 900 80. Bajer K, Molnár O, Török J, Herczeg G: **Ultraviolet nuptial colour determines fight success in male European green lizards (*Lacerta viridis*).** *Biology Letters* 2011, **7**(6):866-868.
- 44 901
- 45 902 81. Averbek M, Gebhardt CA, Voigt S, Beilharz S, Anderegg U, Termeer CC, Sleeman JP, Simon JC: **Differential Regulation of Hyaluronan Metabolism in the Epidermal and Dermal Compartments of Human Skin by UVB Irradiation.** *Journal of Investigative Dermatology* 2007, **127**(3):687-697.
- 46 903
- 47 904
- 48 905
- 49 906 82. Kurdykowski S, Mine S, Bardey V, Danoux L, Jeanmaire C, Pauly G, Brabencova E, Wegrowski Y, Maquart FX: **Ultraviolet-B irradiation induces differential regulations of hyaluronidase**
- 50 907
- 51
- 52
- 53
- 54
- 55
- 56
- 57
- 58
- 59
- 60
- 61
- 62
- 63
- 64
- 65

- 908 expression and activity in normal human keratinocytes. *Photochem Photobiol* 2011,  
1 909 **87**(5):1105-1112.
- 2 910 83. Urrutia R: **KRAB-containing zinc-finger repressor proteins**. *Genome Biol* 2003, **4**.
- 3 911 84. Wolfe SA, Nekludova L, Pabo CO: **DNA recognition by Cys2His2 zinc finger proteins**. *Annu Rev*  
4 912 *Biophys Biomol Struct* 2000, **29**.
- 5 913 85. Englbrecht CC, Schoof H, Böhm S: **Conservation, diversification and expansion of C2H2 zinc**  
6 914 **finger proteins in the Arabidopsis thaliana genome**. *BMC Genomics* 2004, **5**(1):39.
- 7 915 86. Emerson RO, Thomas JH: **Adaptive evolution in zinc finger transcription factors**. *PLoS Genet*  
8 916 2009, **5**(1):e1000325.
- 9 917 87. Nowick K, Fields C, Gernat T, Caetano-Anolles D, Kholina N, Stubbs L: **Gain, loss and divergence**  
10 918 **in primate zinc-finger genes: a rich resource for evolution of gene regulatory differences**  
11 919 **between species**. *PLoS One* 2011, **6**(6):e21553.
- 12 920 88. Rieseberg LH: **Chromosomal rearrangements and speciation**. *Trends in Ecology & Evolution*  
13 921 2001, **16**(7):351-358.
- 14 922 89. Kirkpatrick M, Barton N: **Chromosome inversions, local adaptation and speciation**. *Genetics*  
15 923 2006, **173**(1):419-434.
- 16 924 90. Böhme MU, Schneeweiß N, Fritz U, Schlegel M, Berendonk TU: **Small edge populations at risk:**  
17 925 **genetic diversity of the green lizard (Lacerta viridis viridis) in Germany and implications for**  
18 926 **conservation management**. *Conservation Genetics* 2007, **8**(3):555-563.
- 19 927 91. Joger U, Fritz U, Guicking D, Kalyabina-Hauf S, Nagy ZT, Wink M: **Phylogeography of western**  
20 928 **Palaeartic reptiles – Spatial and temporal speciation patterns**. *Zoologischer Anzeiger - A*  
21 929 *Journal of Comparative Zoology* 2007, **246**(4):293-313.
- 22 930 92. Weigert A, Helm C, Meyer M, Nickel B, Arendt D, Hausdorf B, Santos SR, Halanych KM,  
23 931 Purschke G, Bleidorn C *et al*: **Illuminating the base of the annelid tree using transcriptomics**.  
24 932 *Mol Biol Evol* 2014, **31**(6):1391-1401.
- 25 933 93. Kircher M, Sawyer S, Meyer M: **Double indexing overcomes inaccuracies in multiplex**  
26 934 **sequencing on the Illumina platform**. *Nucleic Acids Res* 2012, **40**(1):e3.
- 27 935 94. Meyer M, Kircher M: **Illumina sequencing library preparation for highly multiplexed target**  
28 936 **capture and sequencing**. *Cold Spring Harb Protoc* 2010, **2010**(6):pdb prot5448.
- 29 937 95. Nawrocki EP, Eddy SR: **Infernal 1.1: 100-fold faster RNA homology searches**. *Bioinformatics*  
30 938 2013, **29**(22):2933-2935.
- 31 939 96. Nawrocki EP, Burge SW, Bateman A, Daub J, Eberhardt RY, Eddy SR, Floden EW, Gardner PP,  
32 940 Jones TA, Tate J *et al*: **Rfam 12.0: updates to the RNA families database**. *Nucleic Acids Res*  
33 941 2015, **43**(Database issue):D130-137.
- 34 942 97. Lowe TM, Eddy SR: **tRNAscan-SE: a program for improved detection of transfer RNA genes in**  
35 943 **genomic sequence**. *Nucleic Acids Res* 1997, **25**.
- 36 944 98. Bartschat S, Kehr S, Tafer H, Stadler PF, Hertel J: **snoStrip: a snoRNA annotation pipeline**.  
37 945 *Bioinformatics* 2014, **30**(1):115-116.
- 38 946 99. Jorjani H, Kehr S, Jedlinski DJ, Gumienny R, Hertel J, Stadler PF, Zavolan M, Gruber AR: **An**  
39 947 **updated human snoRNAome**. *Nucleic Acids Res* 2016, **44**(11):5068-5082.
- 40 948 100. Taft RJ, Glazov EA, Lassmann T, Hayashizaki Y, Carninci P, Mattick JS: **Small RNAs derived from**  
41 949 **snoRNAs**. *RNA* 2009, **15**(7):1233-1240.
- 42 950 101. Haas BJ, Papanicolaou A, Yassour M, Grabherr M, Blood PD, Bowden J, Couger MB, Eccles D, Li  
43 951 B, Lieber M *et al*: **De novo transcript sequence reconstruction from RNA-Seq: reference**  
44 952 **generation and analysis with Trinity**. *Nature protocols* 2013, **8**(8):10.1038/nprot.2013.1084.
- 45 953 102. Hertel J, Stadler PF: **The Expansion of Animal MicroRNA Families Revisited**. *Life (Basel)* 2015,  
46 954 **5**(1):905-920.
- 47 955 103. Smit A, Hubley R: **RepeatModeler Open-1.0**. 2008-2015.
- 48 956 104. Smit A, Hubley R, Green P: **RepeatMasker Open-4.0**. 2013-2015.
- 49 957 105. Li H: **Aligning sequence reads, clone sequences and assembly contigs with BWA-MEM**.  
50 958 *arXiv:13033997* 2013.
- 51  
52  
53  
54  
55  
56  
57  
58  
59  
60  
61  
62  
63  
64  
65

- 959 106. Garrison E, Marth G: **Haplotype-based variant detection from short-read sequencing**. *arXiv preprint* 2012, **arXiv:1207.3907** ([q-bio.GN]\*).
- 1 960
- 2 961 107. Lohse K, Harrison RJ, Barton NH: **A general method for calculating likelihoods under the**
- 3 962 **coalescent process**. *Genetics* 2011, **189**(3):977-987.
- 4 963 108. Nurnberger B, Lohse K, Fijarczyk A, Szymura JM, Blaxter ML: **Para-allopatry in hybridizing fire-**
- 5 964 **bellied toads (*Bombina bombina* and *B. variegata*): Inference from transcriptome-wide**
- 6 965 **coalescence analyses**. *Evolution* 2016, **70**(8):1803-1818.
- 7 966 109. Caughley G: **Parameters for Seasonally Breeding Populations**. *Ecology* 1967, **48**(5):834-839.
- 8 967 110. Elbing K: **Zur Wiederbesiedlung brandgeschädigter Teilhabitate durch Smaragdeidechsen**
- 9 968 **(*Lacerta viridis*)**. *Salamandra* 2000, **36**(3):175-184.
- 10 969 111. Saint Girons H, Castanet J, Bradshaw D, Baron J-P: **Démographie comparée de deux**
- 11 970 **populations françaises de *Lacerta viridis* (Laurenti, 1768)**. *Journal of Ecology* 1989, **44**(4):361-
- 12 971 386.
- 13 972 112. Rykena S, Nettmann HK: ***Lacerta viridis* (Laurenti, 1768) – Smaragdeidechse**, vol. 2; 1984.
- 14 973 113. Tollis M, Ausubel G, Ghimire D, Boissinot S: **Multi-Locus Phylogeographic and Population**
- 15 974 **Genetic Analysis of *Anolis carolinensis*: Historical Demography of a Genomic Model Species**.
- 16 975 *PLoS One* 2012, **7**(6):e38474.
- 17 976 114. Mohiyuddin M, Mu JC, Li J, Bani Asadi N, Gerstein MB, Abyzov A, Wong WH, Lam HY: **MetaSV:**
- 18 977 **an accurate and integrative structural-variant caller for next generation sequencing**.
- 19 978 *Bioinformatics* 2015, **31**(16):2741-2744.
- 20 979 115. Chen K, Wallis JW, McLellan MD, Larson DE, Kalicki JM, Pohl CS, McGrath SD, Wendl MC, Zhang
- 21 980 Q, Locke DP *et al*: **BreakDancer: an algorithm for high-resolution mapping of genomic**
- 22 981 **structural variation**. *Nat Methods* 2009, **6**(9):677-681.
- 23 982 116. Abyzov A, Urban AE, Snyder M, Gerstein M: **CNVnator: an approach to discover, genotype,**
- 24 983 **and characterize typical and atypical CNVs from family and population genome sequencing**.
- 25 984 *Genome Res* 2011, **21**(6):974-984.
- 26 985 117. Ye K, Schulz MH, Long Q, Apweiler R, Ning Z: **Pindel: a pattern growth approach to detect**
- 27 986 **break points of large deletions and medium sized insertions from paired-end short reads**.
- 28 987 *Bioinformatics* 2009, **25**(21):2865-2871.
- 29 988 118. Xie C, Tammi MT: **CNV-seq, a new method to detect copy number variation using high-**
- 30 989 **throughput sequencing**. *BMC Bioinformatics* 2009, **10**:80-80.
- 31 990 119. Kent WJ, Baertsch R, Hinrichs A, Miller W, Haussler D: **Evolution's cauldron: duplication,**
- 32 991 **deletion, and rearrangement in the mouse and human genomes**. *Proc Natl Acad Sci U S A*
- 33 992 **2003, 100**(20):11484-11489.
- 34 993 120. Blanchette M, Kent WJ, Riemer C, Elnitski L, Smit AF, Roskin KM, Baertsch R, Rosenbloom K,
- 35 994 Clawson H, Green ED *et al*: **Aligning multiple genomic sequences with the threaded blockset**
- 36 995 **aligner**. *Genome Res* 2004, **14**(4):708-715.
- 37 996 121. Hickey G, Paten B, Earl D, Zerbino D, Haussler D: **HAL: a hierarchical format for storing and**
- 38 997 **analyzing multiple genome alignments**. *Bioinformatics* 2013, **29**(10):1341-1342.
- 39 998 122. Harris R: **Improved pairwise alignment of genomic DNA**. *. Ph.D. Thesis*. The Pennsylvania State
- 40 999 University.; 2007.
- 41 1000 123. Walter Costa MB, Höner zu Siederdisen C, Stadler PF, Nowick K: **SSS-test: a novel test for**
- 42 1001 **detecting selection on the secondary structures of non-coding RNAs. (submitted)**. *Nucleic*
- 43 1002 *Acids Res* 2017.
- 44 1003 124. Lorenz R, Bernhart SH, Höner zu Siederdisen C, Tafer H, Flamm C, Stadler PF, Hofacker IL:
- 45 1004 **ViennaRNA Package 2.0. Algorithms for Molecular Biology** 2011, **6**(1):26.
- 46 1005 125. Lange SJ, Maticzka D, Mohl M, Gagnon JN, Brown CM, Backofen R: **Global or local? Predicting**
- 47 1006 **secondary structure and accessibility in mRNAs**. *Nucleic Acids Res* 2012, **40**(12):5215-5226.
- 48 1007 126. Yates A, Akanni W, Amode MR, Barrell D, Billis K, Carvalho-Silva D, Cummins C, Clapham P,
- 49 1008 Fitzgerald S, Gil L *et al*: **Ensembl 2016**. *Nucleic Acids Res* 2016, **44**(D1):D710-716.
- 50
- 51
- 52
- 53
- 54
- 55
- 56
- 57
- 58
- 59
- 60
- 61
- 62
- 63
- 64
- 65

- 1009 127. Hongo JA, de Castro GM, Cintra LC, Zerlotini A, Lobo FP: **POTION: an end-to-end pipeline for**  
11010 **positive Darwinian selection detection in genome-scale data through phylogenetic**  
21011 **comparison of protein-coding genes.** *BMC Genomics* 2015, **16**:567.  
31012 128. Yang Z: **PAML 4: phylogenetic analysis by maximum likelihood.** *Mol Biol Evol* 2007,  
41013 **24**(8):1586-1591.  
51014 129. Kolora R, Weigert A, Saffari A, Kehr S, Spröer C, Overmann J, Bunk B, Faria R, Nowick K, Henle  
71015 K *et al*: **Divergent evolution between sister species of European green lizards (Version 1)**  
81016 **[Data set].** *Zenodo* 2018. <http://doi.org/10.5281/zenodo.1219810>  
91017 130. Kolora R, Weigert A, Saffari A, Kehr S, Costa MW, Spröer C, Indrischek H, Doose G, Chintalapati  
101018 M, Lohse K *et al*: **Supporting data for 'Divergent evolution in the genomes of closely-related**  
121019 **lacertids, *Lacerta viridis* and *L.bilineata* and implications for speciation'.** *GigaScience*  
131020 *Database* 2018. <http://dx.doi.org/10.5524/100533>

14  
151021

16  
171022

18  
19

20  
211023

## Figure Legends

22  
23

241024

Figure 1. Thirteen different demographic scenarios were fitted. The models M1.1, M2.1 and  
M3.1 are strict divergence without gene flow; M1.2, M2.2 and M3.2 allow for post-divergence  
gene flow from *L.viridis* to *L. bilineata*; M1.3, M2.3 and M3.3 assume gene flow in the reverse  
direction i.e. (from *L. bilineata* to *L. viridis*). The models M4.2 and M5.2 allow for discrete  
admixture from *L. viridis* to *L. bilineata* and models M4.3 and M5.3 assume the admixture in  
the reverse direction (from *L. bilineata* to *L. viridis*). The effective population size is either  
assumed to be identical between both species and their ancestor (class M1.\*) or one of the  
species has a different effective population size compared to the other species and ancestor  
(classes M2.\*-5.\*).

26  
271025

28  
291026

30  
311027

32  
331028

34  
351029

36  
371030

38  
391031

40  
411032

42  
431033

44  
45

46  
471034

Figure 2. Total counts and length ranges (in bp) of genomic rearrangements of SVs between *L.*  
*viridis* and *L. bilineata*. The counts are represented by bars and length ranges by whiskers (y-  
axis is log<sub>10</sub>-scaled). The rearrangements plotted are categorized into deletions (DEL),  
duplications (DUP), insertions (INS) and inversions (INV).

48  
49

50  
511035

52  
531036

54  
551037

56  
57

58  
59

60  
61

62  
63  
64  
65

1038

1  
2

3 1039

4

5 1040

6

7 1041

8

9 1042

10

11 1043

12

13 1044

14

15 1045

16

17 1046

18

19 1047

20

21 1048

22

23 1049

24

25 1050

26

27 1051

28

29 1052

30

31

32

33

34

35

36

37

38

39

40

41

42

43

44

45

46

47

48

49

50

51

52

53

54

55

56

57

58

59

60

61

62

63

64

65

Figure 3. The folded blockwise site frequency spectrum (bSFS). The variation in alleles represented by different colours (the ancestral state showed in red). Given a single genealogy (a diploid genome from two populations can form six possible genealogies), each block contains four mutation types: i) unique heterozygous sites in *L. bilineata*, ii) unique heterozygous sites in *L. viridis*, iii) shared heterozygous sites between *L. viridis* and *L. bilineata* or iv) homozygous sites which are different between *L. viridis* and *L. bilineata* i.e. homozygous fixed differences. The bSFS (spectrum of SFS) has been calculated by counting the number of occurrences of each SFS.

## Tables

Table 1. The  $\Delta AIC$  of the best model (i.e IM 2 B(x) $\rightarrow$ V ) compared to the other scenarios. To lower the effect of linkage between blocks we adjusted the AIC values of each model by only sampling every 1000 blocks. The best model is highlighted in bold. Note: ADM - Isolation with discrete admixture; IM - Isolation with migration and DIV - Strict divergence without gene flow.

| Model ID    | Model type                               | $\Delta AIC$ |
|-------------|------------------------------------------|--------------|
| M5.3        | ADM 2B(x) $\rightarrow$ V                | -47.2        |
| M3.2        | ADM 2V (x) $\rightarrow$ B               | -141         |
| M4.3        | ADM 2B $\rightarrow$ V (x)               | -47.2        |
| M3.2        | ADM 2V $\rightarrow$ B(x)                | -141         |
| <b>M3.3</b> | <b>IM 2B(x)<math>\rightarrow</math>V</b> | <b>0</b>     |
| M3.2        | IM 2V(x) $\rightarrow$ B                 | -77.9        |
| M3.1        | DIV 2 b                                  | -1380        |
| M2.3        | IM 2B $\rightarrow$ V (x)                | -32.9        |
| M2.2        | IM 2V $\rightarrow$ B(x)                 | -86.5        |



1  
2  
3  
4  
5  
6  
7  
8  
9  
10 1053  
11  
12  
13  
14  
15  
16  
17  
18  
19  
20  
21  
22  
23  
24  
25  
26  
27  
28  
29  
30  
31  
32  
33  
34  
35  
36  
37  
38  
39  
40  
41  
42  
43  
44  
45  
46  
47  
48  
49  
50  
51  
52  
53  
54  
55  
56  
57  
58  
59  
60  
61  
62  
63  
64  
65

|      |           |       |
|------|-----------|-------|
| M2.1 | DIV 2     | -1140 |
| M1.3 | IM 1B->V  | -487  |
| M1.2 | IM 1V ->B | -128  |
| M1.1 | DIV 1     | -1380 |



Click here to access/download  
**Supplementary Material**  
Figure\_1.svg



Click here to access/download  
**Supplementary Material**  
Figure\_2.svg



Click here to access/download  
**Supplementary Material**  
Figure\_3.svg

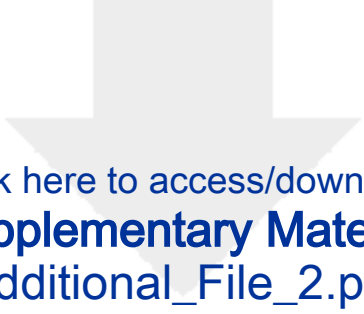

Click here to access/download  
**Supplementary Material**  
Additional\_File\_2.pdf

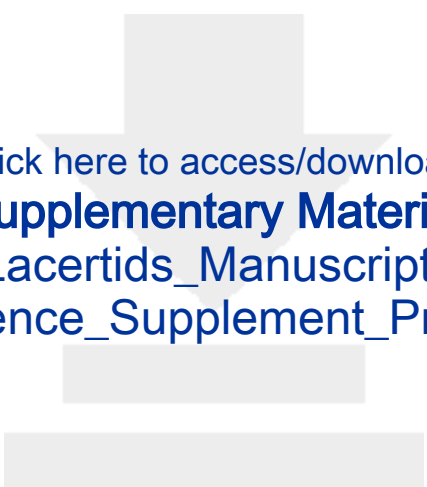

Click here to access/download  
**Supplementary Material**  
Lacertids\_Manuscript-  
Gigascience\_Supplement\_Proofs.pdf

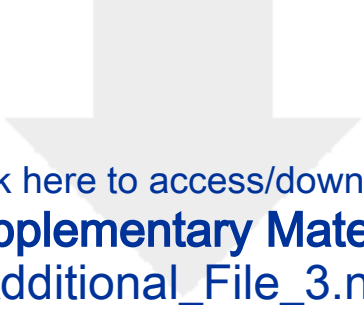

Click here to access/download  
**Supplementary Material**  
Additional\_File\_3.nb

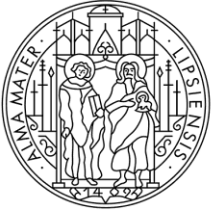

# UNIVERSITÄT LEIPZIG

Universität Leipzig, Institut für Biologie, Talstraße 33, 04103 Leipzig

Fakultät für  
Lebenswissenschaften  
Institut für Biologie  
**Molekulare Evolution und  
Systematik der Tiere**  
Prof. Dr. Martin Schlegel  
**17. May 2018**

Dear *Dr. Scott Edmunds*,

We enclose our manuscript “*Divergent evolution in the genomes of closely-related lacertids, Lacerta viridis and L. bilineata and implications for speciation*” for your consideration.

Lizards are valuable resources to study evolution in higher vertebrates due to their well-known phylogeographies and adaptive radiation. The phylogeography of the European green lizards (*Lacerta viridis* complex) in particular has been studied since three decades through ecological experiments and molecular markers. The *L. viridis* complex was recently delineated into two separate species, *L. viridis* and *L. bilineata*, owing to the reproductive barriers between their progeny. However, factors contributing to their divergence are unknown and their species status is still debatable due to the absence of morphological variation.

We present the genomes of *L. viridis* and *L. bilineata*, the first in *Lacertidae* family through *de novo* assemblies using Illumina and PacBio sequencing technologies. Transcriptomic data of multiple tissues from the same individuals were used for annotation and detecting signs of selection. We conducted genome-wide analyses mainly involving genomic variation, rearrangements, changes in non-coding elements and species-specific adaptations. We implemented the blockwise site frequency spectrum to study lacertid demographic histories and estimated their split around 2.7-3.05 Mya with gene flow in the direction from *L. viridis* to *L. bilineata*.

We found adaptation of cutaneous UV-B responsive genes as major drivers of preferential mating in lacertids. Species specific diversification of the non-coding repertoire; transcription factors divergence; adaptation of genes related to behavior, neuronal and reproductive development; association of positively selected genes with inversions as contributors to reproductive isolation. We provide first insights into the genomes and population histories of European green lizards pivotal for their conservation as well as important resources for future work on speciation.

We hope that you agree that our manuscript is of interest to the broad readership of *Gigascience* since it overlaps with multiple themes of your esteemed journal including comparative genomics, evolution and ecology.

All the authors declare no competing interests and approve the manuscript for submission. We confirm that the content has not been published or submitted elsewhere. We look forward to hearing from you.

With best regards,  
*Rohit Kolora, Peter F Stadler and Martin Schlegel*

**Universität Leipzig**  
Fakultät für Lebenswissenschaften  
Institut für Biologie  
Molekulare Evolution und Systematik  
der Tiere  
Talstraße 33  
04103 Leipzig

**Telefon**  
+49 341 97-36725

**Fax**  
+49 341 97-36789

**E-Mail**  
schlegel@rz.uni-leipzig.de

**Web**  
<http://home.uni-leipzig.de/agspzoo/>

**Postfach intern**  
220001

Kein Zugang für elektronisch  
signierte sowie für verschlüsselte  
elektronische Dokumente
